# Supplementary material for: Under Normoxia Simvastatin Shifts Lipid Metabolism of B16.F10 Melanoma Cells to Support Their Aggressiveness
Source: Preprints.org preprint supplement (doi:10.20944/preprints202409.1655.v1), 2024-09-23
Supplement: Supplementary file 1 [file supplementary]

## Sheet: All genes
	Supplementary table 1. All genes
Transcript_ID	Gene_ID	SIM.value	CONTROL.value	FR SIM vs. CTR	p-value	FDR-adjusted p-value	is DEG?	Gene_name	Gene_description
TCONS_00022106	ENSMUSG00000029860	7.25854	10.0192	-1.38034	0.133574	0.442427	FALSE	Zyx	zyxin [Source:MGI Symbol;Acc:MGI:103072]
ENSMUST00000203849	ENSMUSG00000029860	4.21462	5.74605	-1.36336	0.255127	0.588875	FALSE	Zyx	zyxin [Source:MGI Symbol;Acc:MGI:103072]
TCONS_00022105	ENSMUSG00000029860	12.1873	9.61369	1.26771	0.490929	0.747692	FALSE	Zyx	zyxin [Source:MGI Symbol;Acc:MGI:103072]
ENSMUST00000043616	ENSMUSG00000034636	13.651	12.0584	1.13208	0.204987	0.541391	FALSE	Zyg11b	zyg-ll family member B, cell cycle regulator [Source:MGI Symbol;Acc:MGI:2685277]
TCONS_00015664	ENSMUSG00000039686	3.20972	0.0694483	46.2174	0.197203	0.536035	FALSE	Zer1	zyg-11 related, cell cycle regulator [Source:MGI Symbol;Acc:MGI:2442511]
ENSMUST00000113677	ENSMUSG00000039686	3.21471	5.23279	-1.62776	0.394502	0.693623	FALSE	Zer1	zyg-11 related, cell cycle regulator [Source:MGI Symbol;Acc:MGI:2442511]
ENSMUST00000044751	ENSMUSG00000039686	2.07735	0.343384	6.04963	0.451127	0.726248	FALSE	Zer1	zyg-11 related, cell cycle regulator [Source:MGI Symbol;Acc:MGI:2442511]
ENSMUST00000075117	ENSMUSG00000034430	10.9345	8.57092	1.27576	0.112247	0.402891	FALSE	Zxdc	ZXD family zinc finger C [Source:MGI Symbol;Acc:MGI:1933108]
ENSMUST00000122091	ENSMUSG00000032400	8.45843	12.1068	-1.43133	0.03265	0.204636	FALSE	Zwilch	zwilch kinetochore protein [Source:MGI Symbol;Acc:MGI:1915264]
ENSMUST00000034803	ENSMUSG00000032264	24.6925	29.9391	-1.21248	0.0481834	0.255509	FALSE	Zw10	zw10 kinetochore protein [Source:MGI Symbol;Acc:MGI:1349478]
ENSMUST00000160337	ENSMUSG00000019923	4.29488	6.21012	-1.44593	0.152284	0.4728	FALSE	Zwint	ZW10 interactor [Source:MGI Symbol;Acc:MGI:1289227]
ENSMUST00000020081	ENSMUSG00000019923	40.1826	42.8191	-1.06561	0.308561	0.619594	FALSE	Zwint	ZW10 interactor [Source:MGI Symbol;Acc:MGI:1289227]
TCONS_00029085	XLOC_018020	6.20809	4.4257	1.40274	0.00517648	0.0844067	FALSE	ZNT4	Zinc transporter 4
ENSMUST00000172518	ENSMUSG00000036315	13.7178	10.2712	1.33555	0.266215	0.598783	FALSE	Znrd1	zinc ribbon domain containing, 1 [Source:MGI Symbol;Acc:MGI:1913386]
ENSMUST00000058754	ENSMUSG00000043207	19.8618	18.2173	1.09027	0.25176	0.586672	FALSE	Zmpste24	zinc metallopeptidase, STE24 [Source:MGI Symbol;Acc:MGI:1890508]
ENSMUST00000096430	ENSMUSG00000071757	6.88916	6.49298	1.06102	0.822899	0.921921	FALSE	Zhx2	zinc fingers and homeoboxes 2 [Source:MGI Symbol;Acc:MGI:2683087]
ENSMUST00000207107	ENSMUSG00000055670	12.8541	8.77711	1.4645	0.00100599	0.0490145	FALSE	Zzef1	zinc finger, ZZ-type with EF hand domain 1 [Source:MGI Symbol;Acc:MGI:2444286]
TCONS_00017412	ENSMUSG00000039068	1.8113	5.97133	-3.29671	0.215286	0.551051	FALSE	Zzz3	zinc finger, ZZ domain containing 3 [Source:MGI Symbol;Acc:MGI:1920453]
ENSMUST00000106101	ENSMUSG00000039068	6.92533	5.66465	1.22255	0.363992	0.668187	FALSE	Zzz3	zinc finger, ZZ domain containing 3 [Source:MGI Symbol;Acc:MGI:1920453]
TCONS_00029457	ENSMUSG00000073062	1.73773	0.000764667	2272.54	0.198487	0.536105	FALSE	Zxdb	zinc finger, X-linked, duplicated B [Source:MGI Symbol;Acc:MGI:3694898]
ENSMUST00000101388	ENSMUSG00000073062	1.1066	1.67884	-1.51711	0.352745	0.658133	FALSE	Zxdb	zinc finger, X-linked, duplicated B [Source:MGI Symbol;Acc:MGI:3694898]
ENSMUST00000117281	ENSMUSG00000073060	3.40503	3.17575	1.0722	0.433492	0.71507	FALSE	Zxda	zinc finger, X-linked, duplicated A [Source:MGI Symbol;Acc:MGI:1921689]
ENSMUST00000106057	ENSMUSG00000028180	3.00122	3.09171	-1.03015	0.540535	0.766382	FALSE	Zranb2	zinc finger, RAN-binding domain containing 2 [Source:MGI Symbol;Acc:MGI:1858211]
ENSMUST00000106058	ENSMUSG00000028180	5.04797	6.91795	-1.37044	0.550994	0.773567	FALSE	Zranb2	zinc finger, RAN-binding domain containing 2 [Source:MGI Symbol;Acc:MGI:1858211]
ENSMUST00000184802	ENSMUSG00000028180	0.452054	1.50995	-3.34019	0.801805	0.912783	FALSE	Zranb2	zinc finger, RAN-binding domain containing 2 [Source:MGI Symbol;Acc:MGI:1858211]
ENSMUST00000136378	ENSMUSG00000074578	1.53713	3.4821	-2.26532	0.0162675	0.142712	TRUE	Zfas1	zinc finger, NFX1-type containing 1, antisense RNA 1 [Source:MGI Symbol;Acc:MGI:1916199]
ENSMUST00000143587	ENSMUSG00000074578	2.57689	3.68007	-1.42811	0.388749	0.689081	FALSE	Zfas1	zinc finger, NFX1-type containing 1, antisense RNA 1 [Source:MGI Symbol;Acc:MGI:1916199]
ENSMUST00000048988	ENSMUSG00000039501	3.038	0.400795	7.57993	0.321589	0.630937	FALSE	Znfx1	zinc finger, NFX1-type containing 1 [Source:MGI Symbol;Acc:MGI:2138982]
TCONS_00016548	ENSMUSG00000039501	1.85246	0.469476	3.9458	0.51467	0.750245	FALSE	Znfx1	zinc finger, NFX1-type containing 1 [Source:MGI Symbol;Acc:MGI:2138982]
TCONS_00016547	ENSMUSG00000039501	6.95861	5.84543	1.19044	0.934608	0.972355	FALSE	Znfx1	zinc finger, NFX1-type containing 1 [Source:MGI Symbol;Acc:MGI:2138982]
ENSMUST00000128676	ENSMUSG00000039501	1.8304	1.49476	1.22454	0.979034	0.990534	FALSE	Znfx1	zinc finger, NFX1-type containing 1 [Source:MGI Symbol;Acc:MGI:2138982]
ENSMUST00000177633	ENSMUSG00000039671	9.58455	5.47699	1.74997	0.331606	0.640669	FALSE	Zmynd8	zinc finger, MYND-type containing 8 [Source:MGI Symbol;Acc:MGI:1918025]
TCONS_00016533	ENSMUSG00000039671	0.2683	1.18344	-4.4109	0.426448	0.714068	FALSE	Zmynd8	zinc finger, MYND-type containing 8 [Source:MGI Symbol;Acc:MGI:1918025]
ENSMUST00000109266	ENSMUSG00000039671	2.68762	1.65865	1.62037	0.472017	0.740206	FALSE	Zmynd8	zinc finger, MYND-type containing 8 [Source:MGI Symbol;Acc:MGI:1918025]
TCONS_00016532	ENSMUSG00000039671	5.2975	7.38854	-1.39472	0.783322	0.905048	FALSE	Zmynd8	zinc finger, MYND-type containing 8 [Source:MGI Symbol;Acc:MGI:1918025]
TCONS_00016536	ENSMUSG00000039671	2.44681	2.53868	-1.03755	0.921008	0.965864	FALSE	Zmynd8	zinc finger, MYND-type containing 8 [Source:MGI Symbol;Acc:MGI:1918025]
ENSMUST00000110634	ENSMUSG00000021156	14.1389	10.3733	1.36301	0.620883	0.815322	FALSE	Zmynd11	zinc finger, MYND domain containing 11 [Source:MGI Symbol;Acc:MGI:1913755]
ENSMUST00000223421	ENSMUSG00000021156	4.94632	5.85677	-1.18407	0.832818	0.925919	FALSE	Zmynd11	zinc finger, MYND domain containing 11 [Source:MGI Symbol;Acc:MGI:1913755]
TCONS_00008607	ENSMUSG00000040123	3.59743	1.84354	1.95137	0.262184	0.594979	FALSE	Zmym5	zinc finger, MYM-type 5 [Source:MGI Symbol;Acc:MGI:3041170]
ENSMUST00000173954	ENSMUSG00000040123	1.9895	1.89766	1.0484	0.635183	0.824024	FALSE	Zmym5	zinc finger, MYM-type 5 [Source:MGI Symbol;Acc:MGI:3041170]
TCONS_00019660	ENSMUSG00000042446	1.8708	3.84036	-2.05278	0.0273396	0.187223	TRUE	Zmym4	zinc finger, MYM-type 4 [Source:MGI Symbol;Acc:MGI:1915035]
ENSMUST00000106108	ENSMUSG00000042446	3.42529	2.9995	1.14196	0.758716	0.892648	FALSE	Zmym4	zinc finger, MYM-type 4 [Source:MGI Symbol;Acc:MGI:1915035]
TCONS_00029950	ENSMUSG00000031310	5.97074	4.61638	1.29338	0.175356	0.505893	FALSE	Zmym3	zinc finger, MYM-type 3 [Source:MGI Symbol;Acc:MGI:1927231]
ENSMUST00000055013	ENSMUSG00000043872	2.80598	1.26588	2.21662	0.20286	0.539524	FALSE	Zmym1	zinc finger, MYM domain containing 1 [Source:MGI Symbol;Acc:MGI:1915560]
ENSMUST00000109785	ENSMUSG00000041164	9.32338	8.6264	1.0808	0.98841	0.994432	FALSE	Zmiz2	zinc finger, MIZ-type containing 2 [Source:MGI Symbol;Acc:MGI:106374]
ENSMUST00000162645	ENSMUSG00000007817	2.18767	1.14201	1.91564	0.819358	0.920536	FALSE	Zmiz1	zinc finger, MIZ-type containing 1 [Source:MGI Symbol;Acc:MGI:3040693]
ENSMUST00000007961	ENSMUSG00000007817	1.21001	1.51083	-1.24862	0.969957	0.986904	FALSE	Zmiz1	zinc finger, MIZ-type containing 1 [Source:MGI Symbol;Acc:MGI:3040693]
TCONS_00003324	ENSMUSG00000009076	17.2701	22.7133	-1.31518	0.181432	0.514765	FALSE	Zmat5	zinc finger, matrin type 5 [Source:MGI Symbol;Acc:MGI:1914428]
ENSMUST00000199033	ENSMUSG00000074182	0.288844	1.11805	-3.87077	0.949207	0.978782	FALSE	Znhit6	zinc finger, HIT type 6 [Source:MGI Symbol;Acc:MGI:1916996]
ENSMUST00000103195	ENSMUSG00000020526	7.49742	12.6885	-1.69238	0.148123	0.467314	FALSE	Znhit3	zinc finger, HIT type 3 [Source:MGI Symbol;Acc:MGI:3051596]
ENSMUST00000162726	ENSMUSG00000075227	9.79802	10.577	-1.07951	0.97392	0.988353	FALSE	Znhit2	zinc finger, HIT domain containing 2 [Source:MGI Symbol;Acc:MGI:1352481]
ENSMUST00000106657	ENSMUSG00000034557	12.1287	9.92773	1.22169	0.255063	0.588875	FALSE	Zfyve9	zinc finger, FYVE domain containing 9 [Source:MGI Symbol;Acc:MGI:2652838]
ENSMUST00000021547	ENSMUSG00000066440	8.03948	5.03091	1.59802	0.0108635	0.117641	TRUE	Zfyve26	zinc finger, FYVE domain containing 26 [Source:MGI Symbol;Acc:MGI:1924767]
ENSMUST00000022217	ENSMUSG00000021706	6.79878	4.76162	1.42783	0.0667764	0.305042	FALSE	Zfyve16	zinc finger, FYVE domain containing 16 [Source:MGI Symbol;Acc:MGI:2145181]
ENSMUST00000156586	ENSMUSG00000021706	1.14551	1.77634	-1.55071	0.795964	0.910444	FALSE	Zfyve16	zinc finger, FYVE domain containing 16 [Source:MGI Symbol;Acc:MGI:2145181]
ENSMUST00000048319	ENSMUSG00000042628	9.49136	7.22201	1.31423	0.394584	0.693623	FALSE	Zfyve1	zinc finger, FYVE domain containing 1 [Source:MGI Symbol;Acc:MGI:3026685]
TCONS_00006547	ENSMUSG00000042628	5.21351	1.98247	2.62981	0.655371	0.835943	FALSE	Zfyve1	zinc finger, FYVE domain containing 1 [Source:MGI Symbol;Acc:MGI:3026685]
TCONS_00006546	ENSMUSG00000042628	1.11509	1.52359	-1.36633	0.888142	0.950686	FALSE	Zfyve1	zinc finger, FYVE domain containing 1 [Source:MGI Symbol;Acc:MGI:3026685]
ENSMUST00000037960	ENSMUSG00000036985	6.13419	3.34188	1.83555	0.107798	0.393658	FALSE	Zdhhc9	zinc finger, DHHC domain containing 9 [Source:MGI Symbol;Acc:MGI:2444393]
ENSMUST00000123054	ENSMUSG00000036985	1.3661	1.21799	1.1216	0.935773	0.972873	FALSE	Zdhhc9	zinc finger, DHHC domain containing 9 [Source:MGI Symbol;Acc:MGI:2444393]
ENSMUST00000076957	ENSMUSG00000060166	6.14484	4.53686	1.35443	0.169643	0.498537	FALSE	Zdhhc8	zinc finger, DHHC domain containing 8 [Source:MGI Symbol;Acc:MGI:1338012]
ENSMUST00000076891	ENSMUSG00000024982	21.0657	21.1719	-1.00504	0.360213	0.664941	FALSE	Zdhhc6	zinc finger, DHHC domain containing 6 [Source:MGI Symbol;Acc:MGI:1914230]
ENSMUST00000035840	ENSMUSG00000034075	23.2726	21.5007	1.08241	0.741545	0.884028	FALSE	Zdhhc5	zinc finger, DHHC domain containing 5 [Source:MGI Symbol;Acc:MGI:1923573]
ENSMUST00000161915	ENSMUSG00000001844	6.02905	5.13767	1.1735	0.686889	0.8543	FALSE	Zdhhc4	zinc finger, DHHC domain containing 4 [Source:MGI Symbol;Acc:MGI:1920131]
ENSMUST00000140497	ENSMUSG00000025786	2.14318	0.543277	3.94492	0.365984	0.669574	FALSE	Zdhhc3	zinc finger, DHHC domain containing 3 [Source:MGI Symbol;Acc:MGI:1926134]
TCONS_00028969	ENSMUSG00000025786	3.78883	6.01286	-1.587	0.430728	0.714068	FALSE	Zdhhc3	zinc finger, DHHC domain containing 3 [Source:MGI Symbol;Acc:MGI:1926134]
TCONS_00028970	ENSMUSG00000025786	0.828006	2.16412	-2.61365	0.502246	0.747692	FALSE	Zdhhc3	zinc finger, DHHC domain containing 3 [Source:MGI Symbol;Acc:MGI:1926134]
ENSMUST00000026892	ENSMUSG00000025786	4.39536	2.2579	1.94666	0.594578	0.800483	FALSE	Zdhhc3	zinc finger, DHHC domain containing 3 [Source:MGI Symbol;Acc:MGI:1926134]
ENSMUST00000006632	ENSMUSG00000006463	4.70959	3.15127	1.49451	0.157458	0.480772	FALSE	Zdhhc24	zinc finger, DHHC domain containing 24 [Source:MGI Symbol;Acc:MGI:1917855]
ENSMUST00000030110	ENSMUSG00000028403	1.14988	0.704953	1.63114	0.36581	0.669574	FALSE	Zdhhc21	zinc finger, DHHC domain containing 21 [Source:MGI Symbol;Acc:MGI:1915518]
TCONS_00019413	ENSMUSG00000028403	9.37097	7.43658	1.26012	0.384263	0.685251	FALSE	Zdhhc21	zinc finger, DHHC domain containing 21 [Source:MGI Symbol;Acc:MGI:1915518]
ENSMUST00000089473	ENSMUSG00000021969	9.02991	7.10064	1.2717	0.0284602	0.190312	FALSE	Zdhhc20	zinc finger, DHHC domain containing 20 [Source:MGI Symbol;Acc:MGI:1923215]
ENSMUST00000049389	ENSMUSG00000039470	4.48303	4.93654	-1.10116	0.202001	0.538996	FALSE	Zdhhc2	zinc finger, DHHC domain containing 2 [Source:MGI Symbol;Acc:MGI:1923452]
TCONS_00019744	ENSMUSG00000037553	3.21237	0.43146	7.44535	0.0281937	0.189557	TRUE	Zdhhc18	zinc finger, DHHC domain containing 18 [Source:MGI Symbol;Acc:MGI:3527792]
ENSMUST00000135999	ENSMUSG00000037553	1.82891	0.967934	1.88949	0.730024	0.878696	FALSE	Zdhhc18	zinc finger, DHHC domain containing 18 [Source:MGI Symbol;Acc:MGI:3527792]
ENSMUST00000084238	ENSMUSG00000037553	4.10981	4.08092	1.00708	0.880118	0.946323	FALSE	Zdhhc18	zinc finger, DHHC domain containing 18 [Source:MGI Symbol;Acc:MGI:3527792]
ENSMUST00000225968	ENSMUSG00000025157	9.4612	10.1035	-1.06789	0.03641	0.21609	FALSE	Zdhhc16	zinc finger, DHHC domain containing 16 [Source:MGI Symbol;Acc:MGI:1921418]
ENSMUST00000118927	ENSMUSG00000030471	6.07517	5.48109	1.10839	0.893776	0.953323	FALSE	Zdhhc13	zinc finger, DHHC domain containing 13 [Source:MGI Symbol;Acc:MGI:1919227]
TCONS_00024083	ENSMUSG00000030471	3.10829	2.65828	1.16929	0.966195	0.985259	FALSE	Zdhhc13	zinc finger, DHHC domain containing 13 [Source:MGI Symbol;Acc:MGI:1919227]
ENSMUST00000196282	ENSMUSG00000029427	1.42858	2.16848	-1.51792	0.34526	0.651369	FALSE	Zcchc8	zinc finger, CCHC domain containing 8 [Source:MGI Symbol;Acc:MGI:1917900]
ENSMUST00000031376	ENSMUSG00000029427	3.24729	3.72936	-1.14845	0.652562	0.834459	FALSE	Zcchc8	zinc finger, CCHC domain containing 8 [Source:MGI Symbol;Acc:MGI:1917900]
ENSMUST00000107824	ENSMUSG00000035649	3.52916	3.04183	1.16021	0.920237	0.965615	FALSE	Zcchc7	zinc finger, CCHC domain containing 7 [Source:MGI Symbol;Acc:MGI:2442912]
TCONS_00000489	ENSMUSG00000038866	7.96206	3.53515	2.25225	0.162417	0.488905	FALSE	Zcchc2	zinc finger, CCHC domain containing 2 [Source:MGI Symbol;Acc:MGI:2444114]
ENSMUST00000119166	ENSMUSG00000038866	2.84064	5.32924	-1.87607	0.309144	0.620389	FALSE	Zcchc2	zinc finger, CCHC domain containing 2 [Source:MGI Symbol;Acc:MGI:2444114]
ENSMUST00000134159	ENSMUSG00000028772	7.7988	8.6802	-1.11302	0.0156502	0.139917	FALSE	Zcchc17	zinc finger, CCHC domain containing 17 [Source:MGI Symbol;Acc:MGI:1919955]
ENSMUST00000018383	ENSMUSG00000018239	7.62532	10.7151	-1.4052	0.00559266	0.0871739	FALSE	Zcchc10	zinc finger, CCHC domain containing 10 [Source:MGI Symbol;Acc:MGI:1196228]
TCONS_00022908	ENSMUSG00000039130	18.2415	23.7074	-1.29964	0.0237721	0.173496	FALSE	Zc3hc1	zinc finger, C3HC type 1 [Source:MGI Symbol;Acc:MGI:1916023]
ENSMUST00000036044	ENSMUSG00000034163	8.12087	6.08731	1.33407	0.0270653	0.186192	FALSE	Zfc3h1	zinc finger, C3H1-type containing [Source:MGI Symbol;Acc:MGI:2446143]
ENSMUST00000190574	ENSMUSG00000102049	8.24494	9.63217	-1.16825	0.308475	0.619507	FALSE	Zbed6	zinc finger, BED type containing 6 [Source:MGI Symbol;Acc:MGI:3828086]
ENSMUST00000041466	ENSMUSG00000034173	1.73157	0.858446	2.0171	0.652236	0.834185	FALSE	Zbed5	zinc finger, BED type containing 5 [Source:MGI Symbol;Acc:MGI:1919220]
TCONS_00020718	ENSMUSG00000034173	2.74065	3.26813	-1.19247	0.852832	0.933774	FALSE	Zbed5	zinc finger, BED type containing 5 [Source:MGI Symbol;Acc:MGI:1919220]
ENSMUST00000041297	ENSMUSG00000034333	8.41259	6.63755	1.26742	0.103286	0.383406	FALSE	Zbed4	zinc finger, BED type containing 4 [Source:MGI Symbol;Acc:MGI:2682302]
ENSMUST00000045909	ENSMUSG00000041995	6.7631	8.60433	-1.27225	0.291596	0.604844	FALSE	Zbed3	zinc finger, BED type containing 3 [Source:MGI Symbol;Acc:MGI:1919364]
TCONS_00025241	ENSMUSG00000030629	9.04586	13.4006	-1.4814	0.394246	0.693325	FALSE	Zfand6	zinc finger, AN1-type domain 6 [Source:MGI Symbol;Acc:MGI:1929510]
ENSMUST00000069537	ENSMUSG00000030629	8.57001	3.20871	2.67086	0.416575	0.709947	FALSE	Zfand6	zinc finger, AN1-type domain 6 [Source:MGI Symbol;Acc:MGI:1929510]
ENSMUST00000178385	ENSMUSG00000030629	14.1595	10.8469	1.3054	0.781337	0.904061	FALSE	Zfand6	zinc finger, AN1-type domain 6 [Source:MGI Symbol;Acc:MGI:1929510]
ENSMUST00000025659	ENSMUSG00000024750	67.5367	50.3037	1.34258	0.00557972	0.0871363	FALSE	Zfand5	zinc finger, AN1-type domain 5 [Source:MGI Symbol;Acc:MGI:1278334]
ENSMUST00000226208	ENSMUSG00000044477	3.10755	3.72758	-1.19952	0.573248	0.786362	FALSE	Zfand3	zinc finger, AN1-type domain 3 [Source:MGI Symbol;Acc:MGI:1096572]
ENSMUST00000079996	ENSMUSG00000053581	4.66729	1.934	2.41328	0.0423046	0.236123	FALSE	Zfand2a	zinc finger, AN1-type domain 2A [Source:MGI Symbol;Acc:MGI:2140729]
ENSMUST00000110851	ENSMUSG00000053581	6.93409	6.17988	1.12204	0.523771	0.756517	FALSE	Zfand2a	zinc finger, AN1-type domain 2A [Source:MGI Symbol;Acc:MGI:2140729]
ENSMUST00000037839	ENSMUSG00000039795	0.977472	2.39088	-2.44598	0.133909	0.44299	FALSE	Zfand1	zinc finger, AN1-type domain 1 [Source:MGI Symbol;Acc:MGI:1913611]
ENSMUST00000027394	ENSMUSG00000026197	2.75243	2.08633	1.31927	0.593312	0.799705	FALSE	Zfand2b	zinc finger, AN1 type domain 2B [Source:MGI Symbol;Acc:MGI:1916068]
ENSMUST00000160439	ENSMUSG00000026197	2.98133	2.33952	1.27434	0.820867	0.921202	FALSE	Zfand2b	zinc finger, AN1 type domain 2B [Source:MGI Symbol;Acc:MGI:1916068]
ENSMUST00000071465	ENSMUSG00000018347	3.3889	1.90154	1.78219	0.223027	0.559227	FALSE	Zkscan6	zinc finger with KRAB and SCAN domains 6 [Source:MGI Symbol;Acc:MGI:1289293]
TCONS_00007355	ENSMUSG00000021327	5.89778	4.8276	1.22168	0.580904	0.792002	FALSE	Zkscan3	zinc finger with KRAB and SCAN domains 3 [Source:MGI Symbol;Acc:MGI:1919989]
TCONS_00007356	ENSMUSG00000021327	1.96139	2.29829	-1.17176	0.660836	0.838878	FALSE	Zkscan3	zinc finger with KRAB and SCAN domains 3 [Source:MGI Symbol;Acc:MGI:1919989]
ENSMUST00000013262	ENSMUSG00000020472	0.289779	5.13126	-17.7075	0.000590123	0.0416324	TRUE	Zkscan17	zinc finger with KRAB and SCAN domains 17 [Source:MGI Symbol;Acc:MGI:2679270]
TCONS_00004859	ENSMUSG00000020472	9.63988	3.77266	2.5552	0.0104404	0.115417	TRUE	Zkscan17	zinc finger with KRAB and SCAN domains 17 [Source:MGI Symbol;Acc:MGI:2679270]
ENSMUST00000101150	ENSMUSG00000020472	0.603486	2.56687	-4.2534	0.01864	0.153765	TRUE	Zkscan17	zinc finger with KRAB and SCAN domains 17 [Source:MGI Symbol;Acc:MGI:2679270]
TCONS_00004860	ENSMUSG00000020472	4.1281	2.47777	1.66606	0.0769449	0.329411	FALSE	Zkscan17	zinc finger with KRAB and SCAN domains 17 [Source:MGI Symbol;Acc:MGI:2679270]
ENSMUST00000066617	ENSMUSG00000029729	6.07155	2.21768	2.7378	0.155611	0.477104	FALSE	Zkscan1	zinc finger with KRAB and SCAN domains 1 [Source:MGI Symbol;Acc:MGI:1921820]
ENSMUST00000019660	ENSMUSG00000029729	9.1584	8.16029	1.12231	0.558646	0.778209	FALSE	Zkscan1	zinc finger with KRAB and SCAN domains 1 [Source:MGI Symbol;Acc:MGI:1921820]
TCONS_00024745	ENSMUSG00000070814	1.22148	2.89974	-2.37396	0.343725	0.650333	FALSE	Zswim9	zinc finger SWIM-type containing 9 [Source:MGI Symbol;Acc:MGI:2447816]
TCONS_00007921	ENSMUSG00000021819	2.78141	1.59034	1.74894	0.353596	0.658681	FALSE	Zswim8	zinc finger SWIM-type containing 8 [Source:MGI Symbol;Acc:MGI:1919156]
ENSMUST00000022358	ENSMUSG00000021819	4.20476	0.478246	8.79205	0.532349	0.76119	FALSE	Zswim8	zinc finger SWIM-type containing 8 [Source:MGI Symbol;Acc:MGI:1919156]
TCONS_00007920	ENSMUSG00000021819	8.69356	8.42422	1.03197	0.875964	0.944975	FALSE	Zswim8	zinc finger SWIM-type containing 8 [Source:MGI Symbol;Acc:MGI:1919156]
ENSMUST00000224751	ENSMUSG00000021819	1.79871	1.9093	-1.06148	0.931704	0.970932	FALSE	Zswim8	zinc finger SWIM-type containing 8 [Source:MGI Symbol;Acc:MGI:1919156]
ENSMUST00000072916	ENSMUSG00000014243	3.9016	5.37528	-1.37771	0.0160343	0.141805	FALSE	Zswim7	zinc finger SWIM-type containing 7 [Source:MGI Symbol;Acc:MGI:1916997]
TCONS_00008886	ENSMUSG00000022201	12.4665	14.7793	-1.18552	0.000295484	0.0380874	FALSE	Zfr	zinc finger RNA binding protein [Source:MGI Symbol;Acc:MGI:1341890]
ENSMUST00000156752	ENSMUSG00000022201	2.03108	3.02334	-1.48854	0.639294	0.826246	FALSE	Zfr	zinc finger RNA binding protein [Source:MGI Symbol;Acc:MGI:1341890]
TCONS_00008884	ENSMUSG00000022201	1.12073	0.723892	1.5482	0.85958	0.937345	FALSE	Zfr	zinc finger RNA binding protein [Source:MGI Symbol;Acc:MGI:1341890]
TCONS_00008887	ENSMUSG00000022201	2.90368	3.75797	-1.29421	0.868315	0.941095	FALSE	Zfr	zinc finger RNA binding protein [Source:MGI Symbol;Acc:MGI:1341890]
TCONS_00029922	ENSMUSG00000079509	2.9955	0.154534	19.3841	0.375398	0.677323	FALSE	Zfx	zinc finger protein X-linked [Source:MGI Symbol;Acc:MGI:99211]
ENSMUST00000088102	ENSMUSG00000079509	0.696834	4.32109	-6.20103	0.441625	0.718821	FALSE	Zfx	zinc finger protein X-linked [Source:MGI Symbol;Acc:MGI:99211]
TCONS_00029921	ENSMUSG00000079509	4.13234	1.78962	2.30905	0.558256	0.778058	FALSE	Zfx	zinc finger protein X-linked [Source:MGI Symbol;Acc:MGI:99211]
TCONS_00029923	ENSMUSG00000079509	3.24317	4.96145	-1.52981	0.803081	0.913184	FALSE	Zfx	zinc finger protein X-linked [Source:MGI Symbol;Acc:MGI:99211]
TCONS_00011862	ENSMUSG00000096433	0.908425	0.572154	1.58773	0.985196	0.993276	FALSE	Zfp994	zinc finger protein 994 [Source:MGI Symbol;Acc:MGI:3643318]
TCONS_00018956	ENSMUSG00000067916	4.46699	2.72943	1.6366	0.105537	0.388637	FALSE	Zfp991	zinc finger protein 991 [Source:MGI Symbol;Acc:MGI:3701604]
ENSMUST00000084149	ENSMUSG00000067916	0.0250297	2.12964	-85.0847	0.138743	0.45159	FALSE	Zfp991	zinc finger protein 991 [Source:MGI Symbol;Acc:MGI:3701604]
TCONS_00019895	ENSMUSG00000078495	2.40523	0.708148	3.39651	0.00244983	0.06195	TRUE	Zfp984	zinc finger protein 984 [Source:MGI Symbol;Acc:MGI:3651978]
TCONS_00019891	ENSMUSG00000078495	2.07387	2.93114	-1.41336	0.24136	0.577888	FALSE	Zfp984	zinc finger protein 984 [Source:MGI Symbol;Acc:MGI:3651978]
TCONS_00016602	ENSMUSG00000089756	0.046315	1.52419	-32.9093	0.00310643	0.0686821	TRUE	Zfp966	zinc finger protein 966 [Source:MGI Symbol;Acc:MGI:3709288]
ENSMUST00000138304	ENSMUSG00000052446	0.662121	2.52764	-3.81749	0.422839	0.713642	FALSE	Zfp961	zinc finger protein 961 [Source:MGI Symbol;Acc:MGI:3583954]
ENSMUST00000202692	ENSMUSG00000058748	4.9221	6.68103	-1.35735	0.0512383	0.264037	FALSE	Zfp958	zinc finger protein 958 [Source:MGI Symbol;Acc:MGI:2385298]
ENSMUST00000073201	ENSMUSG00000058748	2.91455	1.66934	1.74593	0.428214	0.714068	FALSE	Zfp958	zinc finger protein 958 [Source:MGI Symbol;Acc:MGI:2385298]
ENSMUST00000056246	ENSMUSG00000062116	6.26166	3.98314	1.57204	0.00318984	0.0695958	TRUE	Zfp954	zinc finger protein 954 [Source:MGI Symbol;Acc:MGI:1917764]
ENSMUST00000087666	ENSMUSG00000053390	1.77621	1.7758	1.00023	0.591153	0.798013	FALSE	Zfp952	zinc finger protein 952 [Source:MGI Symbol;Acc:MGI:2441928]
ENSMUST00000115535	ENSMUSG00000033972	2.63325	2.41471	1.0905	0.428442	0.714068	FALSE	Zfp944	zinc finger protein 944 [Source:MGI Symbol;Acc:MGI:2442394]
ENSMUST00000091879	ENSMUSG00000071267	5.55264	3.67295	1.51176	0.256703	0.590409	FALSE	Zfp942	zinc finger protein 942 [Source:MGI Symbol;Acc:MGI:1920483]
TCONS_00011860	ENSMUSG00000071267	2.44185	2.81836	-1.15419	0.459917	0.732695	FALSE	Zfp942	zinc finger protein 942 [Source:MGI Symbol;Acc:MGI:1920483]
ENSMUST00000108923	ENSMUSG00000078861	3.2173	2.216	1.45185	0.459444	0.732012	FALSE	Zfp931	zinc finger protein 931 [Source:MGI Symbol;Acc:MGI:2441662]
ENSMUST00000038627	ENSMUSG00000024695	23.2434	21.2207	1.09532	0.794543	0.910151	FALSE	Zfp91	zinc finger protein 91 [Source:MGI Symbol;Acc:MGI:104854]
ENSMUST00000161170	ENSMUSG00000072623	7.65534	3.68951	2.07489	0.00251781	0.062283	TRUE	Zfp9	zinc finger protein 9 [Source:MGI Symbol;Acc:MGI:99210]
TCONS_00007634	ENSMUSG00000059839	1.53403	1.02239	1.50044	0.769443	0.897711	FALSE	Zfp874b	zinc finger protein 874b [Source:MGI Symbol;Acc:MGI:3040702]
ENSMUST00000019572	ENSMUSG00000059839	1.3225	1.07305	1.23248	0.806364	0.914358	FALSE	Zfp874b	zinc finger protein 874b [Source:MGI Symbol;Acc:MGI:3040702]
ENSMUST00000075255	ENSMUSG00000069206	2.16333	1.1085	1.95158	0.526711	0.758433	FALSE	Zfp874a	zinc finger protein 874a [Source:MGI Symbol;Acc:MGI:3040703]
ENSMUST00000159086	ENSMUSG00000024298	4.2505	2.71463	1.56577	0.332	0.641052	FALSE	Zfp871	zinc finger protein 871 [Source:MGI Symbol;Acc:MGI:1921793]
TCONS_00012098	ENSMUSG00000024298	15.8189	13.4885	1.17277	0.532873	0.761433	FALSE	Zfp871	zinc finger protein 871 [Source:MGI Symbol;Acc:MGI:1921793]
TCONS_00026792	ENSMUSG00000054648	0.738776	0.535829	1.37875	0.889553	0.951457	FALSE	Zfp869	zinc finger protein 869 [Source:MGI Symbol;Acc:MGI:1914119]
TCONS_00026790	ENSMUSG00000054648	2.95335	3.23769	-1.09628	0.982574	0.992232	FALSE	Zfp869	zinc finger protein 869 [Source:MGI Symbol;Acc:MGI:1914119]
ENSMUST00000137573	ENSMUSG00000043090	2.47519	2.38854	1.03628	0.624921	0.818236	FALSE	Zfp866	zinc finger protein 866 [Source:MGI Symbol;Acc:MGI:3584369]
ENSMUST00000207193	ENSMUSG00000074405	2.9154	3.88753	-1.33344	0.831944	0.925846	FALSE	Zfp865	zinc finger protein 865 [Source:MGI Symbol;Acc:MGI:2442656]
ENSMUST00000074369	ENSMUSG00000069208	2.37245	1.7345	1.3678	0.764668	0.894815	FALSE	Zfp825	zinc finger protein 825 [Source:MGI Symbol;Acc:MGI:2385315]
ENSMUST00000215902	ENSMUSG00000057982	3.3206	1.66062	1.99962	0.145512	0.463408	FALSE	Zfp809	zinc finger protein 809 [Source:MGI Symbol;Acc:MGI:2143362]
ENSMUST00000072465	ENSMUSG00000057982	4.44747	2.04359	2.1763	0.146212	0.464387	FALSE	Zfp809	zinc finger protein 809 [Source:MGI Symbol;Acc:MGI:2143362]
ENSMUST00000215618	ENSMUSG00000057982	0.160853	3.65224	-22.7055	0.216071	0.551229	FALSE	Zfp809	zinc finger protein 809 [Source:MGI Symbol;Acc:MGI:2143362]
TCONS_00023989	ENSMUSG00000074165	2.27163	1.41222	1.60855	0.787682	0.906977	FALSE	Zfp788	zinc finger protein 788 [Source:MGI Symbol;Acc:MGI:1914857]
ENSMUST00000114583	ENSMUSG00000071477	0.0199433	3.23966	-162.443	0.0351059	0.211969	FALSE	Zfp777	zinc finger protein 777 [Source:MGI Symbol;Acc:MGI:1919556]
ENSMUST00000095944	ENSMUSG00000071477	9.32963	6.0359	1.54569	0.1579	0.481355	FALSE	Zfp777	zinc finger protein 777 [Source:MGI Symbol;Acc:MGI:1919556]
ENSMUST00000052509	ENSMUSG00000054716	9.20587	11.3187	-1.22951	0.253918	0.5886	FALSE	Zfp771	zinc finger protein 771 [Source:MGI Symbol;Acc:MGI:2442050]
ENSMUST00000059199	ENSMUSG00000045757	1.06777	1.05627	1.01089	0.820361	0.9211	FALSE	Zfp764	zinc finger protein 764 [Source:MGI Symbol;Acc:MGI:2443580]
ENSMUST00000121315	ENSMUSG00000044501	1.58498	0.695557	2.27872	0.610933	0.808612	FALSE	Zfp758	zinc finger protein 758 [Source:MGI Symbol;Acc:MGI:2385044]
ENSMUST00000088765	ENSMUSG00000044501	1.52073	1.20508	1.26192	0.790771	0.908595	FALSE	Zfp758	zinc finger protein 758 [Source:MGI Symbol;Acc:MGI:2385044]
ENSMUST00000203609	ENSMUSG00000057691	6.91012	6.28139	1.10009	0.8846	0.948388	FALSE	Zfp746	zinc finger protein 746 [Source:MGI Symbol;Acc:MGI:1916478]
TCONS_00009417	ENSMUSG00000046897	0.25585	6.89442	-26.9471	0.242927	0.579135	FALSE	Zfp740	zinc finger protein 740 [Source:MGI Symbol;Acc:MGI:1915994]
ENSMUST00000119800	ENSMUSG00000046897	0.27092	2.37635	-8.7714	0.265451	0.598178	FALSE	Zfp740	zinc finger protein 740 [Source:MGI Symbol;Acc:MGI:1915994]
ENSMUST00000119830	ENSMUSG00000046897	0.370815	3.58194	-9.65965	0.288395	0.604301	FALSE	Zfp740	zinc finger protein 740 [Source:MGI Symbol;Acc:MGI:1915994]
TCONS_00025008	ENSMUSG00000012640	0.159164	1.22028	-7.66684	0.253812	0.588469	FALSE	Zfp715	zinc finger protein 715 [Source:MGI Symbol;Acc:MGI:1917180]
ENSMUST00000078976	ENSMUSG00000062397	29.6945	33.9872	-1.14456	0.026868	0.185262	FALSE	Zfp706	zinc finger protein 706 [Source:MGI Symbol;Acc:MGI:1915286]
ENSMUST00000041124	ENSMUSG00000040209	10.0346	6.17521	1.62499	0.00966019	0.111041	TRUE	Zfp704	zinc finger protein 704 [Source:MGI Symbol;Acc:MGI:2180715]
ENSMUST00000154256	ENSMUSG00000085795	8.14684	5.95209	1.36874	0.188269	0.52481	FALSE	Zfp703	zinc finger protein 703 [Source:MGI Symbol;Acc:MGI:2662729]
ENSMUST00000230106	ENSMUSG00000033669	1.5306	1.08883	1.40573	0.98999	0.994675	FALSE	Zfp7	zinc finger protein 7 [Source:MGI Symbol;Acc:MGI:99208]
ENSMUST00000063262	ENSMUSG00000058291	1.54829	5.39974	-3.48754	0.0723979	0.318774	FALSE	Zfp68	zinc finger protein 68 [Source:MGI Symbol;Acc:MGI:1344427]
ENSMUST00000085852	ENSMUSG00000058291	3.4145	3.39295	1.00635	0.862905	0.938989	FALSE	Zfp68	zinc finger protein 68 [Source:MGI Symbol;Acc:MGI:1344427]
ENSMUST00000110905	ENSMUSG00000058291	2.50169	2.37326	1.05412	0.974238	0.988524	FALSE	Zfp68	zinc finger protein 68 [Source:MGI Symbol;Acc:MGI:1344427]
ENSMUST00000108829	ENSMUSG00000049755	3.99241	2.20913	1.80723	0.0775399	0.330674	FALSE	Zfp672	zinc finger protein 672 [Source:MGI Symbol;Acc:MGI:2442105]
ENSMUST00000111417	ENSMUSG00000079215	29.4578	26.0493	1.13085	0.294384	0.607041	FALSE	Zfp664	zinc finger protein 664 [Source:MGI Symbol;Acc:MGI:2442505]
ENSMUST00000167316	ENSMUSG00000007812	16.8964	13.8877	1.21664	0.110298	0.39906	FALSE	Zfp655	zinc finger protein 655 [Source:MGI Symbol;Acc:MGI:1919861]
ENSMUST00000196069	ENSMUSG00000007812	1.29621	1.45041	-1.11896	0.298849	0.611006	FALSE	Zfp655	zinc finger protein 655 [Source:MGI Symbol;Acc:MGI:1919861]
ENSMUST00000199322	ENSMUSG00000007812	4.27804	2.73583	1.56371	0.530528	0.760301	FALSE	Zfp655	zinc finger protein 655 [Source:MGI Symbol;Acc:MGI:1919861]
ENSMUST00000112698	ENSMUSG00000049606	0.0762773	1.43247	-18.7798	0.27241	0.601435	FALSE	Zfp644	zinc finger protein 644 [Source:MGI Symbol;Acc:MGI:1277212]
ENSMUST00000112696	ENSMUSG00000049606	2.09395	2.79406	-1.33435	0.380344	0.68222	FALSE	Zfp644	zinc finger protein 644 [Source:MGI Symbol;Acc:MGI:1277212]
ENSMUST00000045466	ENSMUSG00000049606	3.15721	0.986329	3.20097	0.521273	0.75469	FALSE	Zfp644	zinc finger protein 644 [Source:MGI Symbol;Acc:MGI:1277212]
ENSMUST00000087971	ENSMUSG00000027551	4.76042	4.81069	-1.01056	0.277363	0.601474	FALSE	Zfp64	zinc finger protein 64 [Source:MGI Symbol;Acc:MGI:107342]
ENSMUST00000029203	ENSMUSG00000027667	12.6554	8.73335	1.44909	0.199972	0.537391	FALSE	Zfp639	zinc finger protein 639 [Source:MGI Symbol;Acc:MGI:1915028]
TCONS_00022326	ENSMUSG00000030016	5.50788	4.85314	1.13491	0.362785	0.667379	FALSE	Zfp638	zinc finger protein 638 [Source:MGI Symbol;Acc:MGI:1203484]
TCONS_00022325	ENSMUSG00000030016	4.78663	4.21256	1.13628	0.723485	0.875358	FALSE	Zfp638	zinc finger protein 638 [Source:MGI Symbol;Acc:MGI:1203484]
ENSMUST00000112859	ENSMUSG00000059689	1.45138	3.15367	-2.17287	0.0306848	0.197297	TRUE	Zfp637	zinc finger protein 637 [Source:MGI Symbol;Acc:MGI:2448537]
ENSMUST00000223041	ENSMUSG00000059689	12.8624	8.44947	1.52228	0.282482	0.604301	FALSE	Zfp637	zinc finger protein 637 [Source:MGI Symbol;Acc:MGI:2448537]
ENSMUST00000164472	ENSMUSG00000059689	3.79934	10.3811	-2.73234	0.48488	0.747692	FALSE	Zfp637	zinc finger protein 637 [Source:MGI Symbol;Acc:MGI:2448537]
ENSMUST00000112858	ENSMUSG00000059689	5.42659	5.08673	1.06681	0.86605	0.940244	FALSE	Zfp637	zinc finger protein 637 [Source:MGI Symbol;Acc:MGI:2448537]
ENSMUST00000136889	ENSMUSG00000059689	5.71848	6.90742	-1.20791	0.955561	0.981166	FALSE	Zfp637	zinc finger protein 637 [Source:MGI Symbol;Acc:MGI:2448537]
ENSMUST00000084564	ENSMUSG00000045639	4.60705	2.89492	1.59142	0.308765	0.619903	FALSE	Zfp629	zinc finger protein 629 [Source:MGI Symbol;Acc:MGI:2444524]
TCONS_00003506	ENSMUSG00000046311	1.96187	0.322239	6.08825	0.2759	0.601435	FALSE	Zfp62	zinc finger protein 62 [Source:MGI Symbol;Acc:MGI:99662]
TCONS_00018426	ENSMUSG00000028358	1.1156	2.6762	-2.39888	0.234276	0.571623	FALSE	Zfp618	zinc finger protein 618 [Source:MGI Symbol;Acc:MGI:1919950]
ENSMUST00000159109	ENSMUSG00000040524	11.6308	11.4946	1.01185	0.742939	0.884941	FALSE	Zfp609	zinc finger protein 609 [Source:MGI Symbol;Acc:MGI:2674092]
ENSMUST00000064763	ENSMUSG00000052713	3.817	2.81248	1.35716	0.650632	0.833469	FALSE	Zfp608	zinc finger protein 608 [Source:MGI Symbol;Acc:MGI:2442338]
TCONS_00013071	ENSMUSG00000052713	2.0046	2.27689	-1.13583	0.74298	0.884941	FALSE	Zfp608	zinc finger protein 608 [Source:MGI Symbol;Acc:MGI:2442338]
ENSMUST00000162502	ENSMUSG00000051550	1.1783	2.16164	-1.83455	0.871308	0.942827	FALSE	Zfp579	zinc finger protein 579 [Source:MGI Symbol;Acc:MGI:1915740]
TCONS_00024828	ENSMUSG00000066721	7.39834	5.9849	1.23617	0.329152	0.637712	FALSE	Zfp575	zinc finger protein 575 [Source:MGI Symbol;Acc:MGI:2141921]
ENSMUST00000143992	ENSMUSG00000045519	6.41161	6.17472	1.03836	0.80838	0.915085	FALSE	Zfp560	zinc finger protein 560 [Source:MGI Symbol;Acc:MGI:1915280]
ENSMUST00000182852	ENSMUSG00000042439	1.34867	2.33749	-1.73318	0.172972	0.50293	FALSE	Zfp532	zinc finger protein 532 [Source:MGI Symbol;Acc:MGI:3036282]
ENSMUST00000055604	ENSMUSG00000046541	0.912726	1.02523	-1.12326	0.887698	0.95039	FALSE	Zfp526	zinc finger protein 526 [Source:MGI Symbol;Acc:MGI:2445181]
ENSMUST00000086349	ENSMUSG00000051184	2.3287	2.24254	1.03842	0.738426	0.883008	FALSE	Zfp524	zinc finger protein 524 [Source:MGI Symbol;Acc:MGI:1916740]
ENSMUST00000073534	ENSMUSG00000024220	6.70388	4.81178	1.39322	0.0290501	0.192403	FALSE	Zfp523	zinc finger protein 523 [Source:MGI Symbol;Acc:MGI:2687278]
ENSMUST00000057258	ENSMUSG00000046572	4.94306	6.46248	-1.30738	0.110877	0.400368	FALSE	Zfp518b	zinc finger protein 518B [Source:MGI Symbol;Acc:MGI:2140750]
TCONS_00012853	ENSMUSG00000058881	5.04363	3.78707	1.3318	0.126764	0.430564	FALSE	Zfp516	zinc finger protein 516 [Source:MGI Symbol;Acc:MGI:2443957]
ENSMUST00000071233	ENSMUSG00000058881	3.51656	3.07995	1.14176	0.788475	0.907496	FALSE	Zfp516	zinc finger protein 516 [Source:MGI Symbol;Acc:MGI:2443957]
ENSMUST00000031562	ENSMUSG00000043059	1.82305	2.52695	-1.38611	0.418261	0.711207	FALSE	Zfp513	zinc finger protein 513 [Source:MGI Symbol;Acc:MGI:2141255]
TCONS_00024592	ENSMUSG00000025470	1.17452	1.83606	-1.56324	0.183907	0.518224	FALSE	Zfp511	zinc finger protein 511 [Source:MGI Symbol;Acc:MGI:1917002]
ENSMUST00000168194	ENSMUSG00000025470	0.636332	2.68664	-4.22207	0.306655	0.618605	FALSE	Zfp511	zinc finger protein 511 [Source:MGI Symbol;Acc:MGI:1917002]
TCONS_00024988	ENSMUSG00000044452	4.82552	3.68681	1.30886	0.610307	0.808247	FALSE	Zfp507	zinc finger protein 507 [Source:MGI Symbol;Acc:MGI:1916378]
ENSMUST00000101443	ENSMUSG00000068551	6.4646	5.23431	1.23504	0.901015	0.955563	FALSE	Zfp467	zinc finger protein 467 [Source:MGI Symbol;Acc:MGI:1916160]
TCONS_00018380	ENSMUSG00000060206	0.834612	0.917919	-1.09981	0.419635	0.712132	FALSE	Zfp462	zinc finger protein 462 [Source:MGI Symbol;Acc:MGI:107690]
ENSMUST00000069195	ENSMUSG00000051351	3.35086	2.1683	1.54538	0.600452	0.803664	FALSE	Zfp46	zinc finger protein 46 [Source:MGI Symbol;Acc:MGI:99192]
TCONS_00018849	ENSMUSG00000051351	1.99448	1.66997	1.19432	0.875011	0.944516	FALSE	Zfp46	zinc finger protein 46 [Source:MGI Symbol;Acc:MGI:99192]
ENSMUST00000019861	ENSMUSG00000042197	3.12801	1.70822	1.83115	0.308172	0.619507	FALSE	Zfp451	zinc finger protein 451 [Source:MGI Symbol;Acc:MGI:2137896]
TCONS_00028962	ENSMUSG00000047036	2.25446	0.433727	5.19788	0.670928	0.845139	FALSE	Zfp445	zinc finger protein 445 [Source:MGI Symbol;Acc:MGI:2143340]
ENSMUST00000216063	ENSMUSG00000047036	12.0975	11.9269	1.0143	0.736378	0.882352	FALSE	Zfp445	zinc finger protein 445 [Source:MGI Symbol;Acc:MGI:2143340]
TCONS_00028963	ENSMUSG00000047036	1.7832	2.32968	-1.30646	0.939004	0.974415	FALSE	Zfp445	zinc finger protein 445 [Source:MGI Symbol;Acc:MGI:2143340]
ENSMUST00000108566	ENSMUSG00000044876	7.98708	11.248	-1.40827	0.158547	0.482526	FALSE	Zfp444	zinc finger protein 444 [Source:MGI Symbol;Acc:MGI:1923365]
ENSMUST00000177205	ENSMUSG00000064264	2.0747	4.21622	-2.03221	0.0699332	0.31309	FALSE	Zfp428	zinc finger protein 428 [Source:MGI Symbol;Acc:MGI:1916463]
ENSMUST00000166005	ENSMUSG00000059475	5.40847	4.67551	1.15676	0.841088	0.927699	FALSE	Zfp426	zinc finger protein 426 [Source:MGI Symbol;Acc:MGI:1920248]
ENSMUST00000112880	ENSMUSG00000059878	2.15731	0.0896227	24.071	0.00825798	0.104753	TRUE	Zfp422	zinc finger protein 422 [Source:MGI Symbol;Acc:MGI:1914505]
ENSMUST00000057540	ENSMUSG00000059878	2.98414	0.993177	3.00464	0.157212	0.480408	FALSE	Zfp422	zinc finger protein 422 [Source:MGI Symbol;Acc:MGI:1914505]
TCONS_00023392	ENSMUSG00000059878	6.0599	0.681005	8.89846	0.229743	0.568573	FALSE	Zfp422	zinc finger protein 422 [Source:MGI Symbol;Acc:MGI:1914505]
TCONS_00011867	XLOC_007380	5.23238	2.25699	2.3183	0.133712	0.442621	FALSE	ZN420	Zinc finger protein 420
TCONS_00011868	XLOC_007380	0.141024	1.70432	-12.0853	0.373254	0.675332	FALSE	ZN420	Zinc finger protein 420
ENSMUST00000045931	ENSMUSG00000042472	4.61313	4.74588	-1.02878	0.374996	0.676818	FALSE	Zfp410	zinc finger protein 410 [Source:MGI Symbol;Acc:MGI:1289280]
TCONS_00006059	ENSMUSG00000042472	1.75474	0.1619	10.8384	0.521533	0.754801	FALSE	Zfp410	zinc finger protein 410 [Source:MGI Symbol;Acc:MGI:1289280]
ENSMUST00000220832	ENSMUSG00000042472	3.82685	2.849	1.34323	0.567544	0.783924	FALSE	Zfp410	zinc finger protein 410 [Source:MGI Symbol;Acc:MGI:1289280]
ENSMUST00000222606	ENSMUSG00000042472	4.55848	4.57612	-1.00387	0.5733	0.786368	FALSE	Zfp410	zinc finger protein 410 [Source:MGI Symbol;Acc:MGI:1289280]
ENSMUST00000161785	ENSMUSG00000047003	3.2274	2.69794	1.19625	0.747143	0.886325	FALSE	Zfp41	zinc finger protein 41 [Source:MGI Symbol;Acc:MGI:99186]
TCONS_00016012	ENSMUSG00000075040	2.0265	1.03875	1.9509	0.907934	0.959267	FALSE	Zfp408	zinc finger protein 408 [Source:MGI Symbol;Acc:MGI:2685857]
TCONS_00012555	ENSMUSG00000024276	1.31552	0.58786	2.23782	0.471676	0.740163	FALSE	Zfp397	zinc finger protein 397 [Source:MGI Symbol;Acc:MGI:1916506]
TCONS_00012553	ENSMUSG00000024276	2.24124	2.28476	-1.01941	0.696407	0.860596	FALSE	Zfp397	zinc finger protein 397 [Source:MGI Symbol;Acc:MGI:1916506]
TCONS_00012552	ENSMUSG00000024276	3.37838	3.08188	1.09621	0.986967	0.993817	FALSE	Zfp397	zinc finger protein 397 [Source:MGI Symbol;Acc:MGI:1916506]
ENSMUST00000073551	ENSMUSG00000042063	7.66439	7.91421	-1.0326	0.140105	0.454234	FALSE	Zfp386	zinc finger protein 386 (Kruppel-like) [Source:MGI Symbol;Acc:MGI:1930708]
ENSMUST00000112427	ENSMUSG00000038346	0.890531	1.6019	-1.79881	0.245174	0.580069	FALSE	Zfp384	zinc finger protein 384 [Source:MGI Symbol;Acc:MGI:2443203]
TCONS_00022639	ENSMUSG00000038346	8.95754	6.36443	1.40744	0.738679	0.883008	FALSE	Zfp384	zinc finger protein 384 [Source:MGI Symbol;Acc:MGI:2443203]
ENSMUST00000112428	ENSMUSG00000038346	0.379723	1.10474	-2.90933	0.801108	0.91249	FALSE	Zfp384	zinc finger protein 384 [Source:MGI Symbol;Acc:MGI:2443203]
TCONS_00007073	ENSMUSG00000021514	3.39903	1.46238	2.32431	0.140198	0.45436	FALSE	Zfp369	zinc finger protein 369 [Source:MGI Symbol;Acc:MGI:2176229]
TCONS_00007072	ENSMUSG00000021514	2.66946	1.65324	1.61468	0.716215	0.871452	FALSE	Zfp369	zinc finger protein 369 [Source:MGI Symbol;Acc:MGI:2176229]
ENSMUST00000222364	ENSMUSG00000021514	0.838681	1.83537	-2.1884	0.989877	0.994675	FALSE	Zfp369	zinc finger protein 369 [Source:MGI Symbol;Acc:MGI:2176229]
ENSMUST00000059817	ENSMUSG00000044934	9.31456	11.6007	-1.24544	0.00283401	0.0648139	FALSE	Zfp367	zinc finger protein 367 [Source:MGI Symbol;Acc:MGI:2442266]
ENSMUST00000064656	ENSMUSG00000037855	6.31248	7.66972	-1.21501	0.0055253	0.0867037	FALSE	Zfp365	zinc finger protein 365 [Source:MGI Symbol;Acc:MGI:2143676]
ENSMUST00000106072	ENSMUSG00000028799	4.36777	5.83987	-1.33704	0.19159	0.529055	FALSE	Zfp362	zinc finger protein 362 [Source:MGI Symbol;Acc:MGI:2652839]
ENSMUST00000021552	ENSMUSG00000021127	17.3634	14.1549	1.22667	0.265843	0.598637	FALSE	Zfp36l1	zinc finger protein 36, C3H type-like 1 [Source:MGI Symbol;Acc:MGI:107946]
ENSMUST00000074941	ENSMUSG00000063281	7.73291	6.79687	1.13772	0.800934	0.91249	FALSE	Zfp35	zinc finger protein 35 [Source:MGI Symbol;Acc:MGI:99179]
TCONS_00007006	ENSMUSG00000021481	1.79434	4.44608	-2.47784	0.263791	0.596476	FALSE	Zfp346	zinc finger protein 346 [Source:MGI Symbol;Acc:MGI:1349417]
ENSMUST00000021937	ENSMUSG00000021481	1.49145	3.17859	-2.13121	0.329097	0.637712	FALSE	Zfp346	zinc finger protein 346 [Source:MGI Symbol;Acc:MGI:1349417]
ENSMUST00000041361	ENSMUSG00000039834	3.54225	2.491	1.42202	0.822963	0.921921	FALSE	Zfp335	zinc finger protein 335 [Source:MGI Symbol;Acc:MGI:2682313]
TCONS_00016517	ENSMUSG00000039834	1.69766	2.62657	-1.54717	0.997071	0.998158	FALSE	Zfp335	zinc finger protein 335 [Source:MGI Symbol;Acc:MGI:2682313]
ENSMUST00000034147	ENSMUSG00000031711	10.9132	11.0815	-1.01541	0.959852	0.982852	FALSE	Zfp330	zinc finger protein 330 [Source:MGI Symbol;Acc:MGI:1353574]
TCONS_00024735	ENSMUSG00000057894	0.032414	1.32233	-40.7949	0.262518	0.595219	FALSE	Zfp329	zinc finger protein 329 [Source:MGI Symbol;Acc:MGI:1921283]
ENSMUST00000072222	ENSMUSG00000057894	1.71428	0.785032	2.1837	0.425748	0.714068	FALSE	Zfp329	zinc finger protein 329 [Source:MGI Symbol;Acc:MGI:1921283]
ENSMUST00000031227	ENSMUSG00000029290	3.93299	5.96595	-1.5169	0.0308246	0.197561	TRUE	Zfp326	zinc finger protein 326 [Source:MGI Symbol;Acc:MGI:1927246]
ENSMUST00000113481	ENSMUSG00000015597	6.58818	4.3789	1.50453	0.0223332	0.168651	TRUE	Zfp318	zinc finger protein 318 [Source:MGI Symbol;Acc:MGI:1889348]
ENSMUST00000061890	ENSMUSG00000025821	9.16307	7.31175	1.2532	0.0782446	0.33155	FALSE	Zfp282	zinc finger protein 282 [Source:MGI Symbol;Acc:MGI:2141413]
ENSMUST00000047734	ENSMUSG00000041483	9.33337	2.01779	4.62554	3.34e-05	0.024655	TRUE	Zfp281	zinc finger protein 281 [Source:MGI Symbol;Acc:MGI:3029290]
ENSMUST00000112046	ENSMUSG00000041483	0.359553	6.91438	-19.2305	0.00438852	0.0779175	TRUE	Zfp281	zinc finger protein 281 [Source:MGI Symbol;Acc:MGI:3029290]
TCONS_00029781	ENSMUSG00000036916	1.68655	1.50328	1.12191	0.78845	0.907496	FALSE	Zfp280c	zinc finger protein 280C [Source:MGI Symbol;Acc:MGI:2387585]
ENSMUST00000061617	ENSMUSG00000049764	6.98562	2.83686	2.46245	0.014635	0.13596	TRUE	Zfp280b	zinc finger protein 280B [Source:MGI Symbol;Acc:MGI:1927865]
ENSMUST00000069692	ENSMUSG00000055917	0.423554	0.959147	-2.26452	0.517728	0.752356	FALSE	Zfp277	zinc finger protein 277 [Source:MGI Symbol;Acc:MGI:1890393]
ENSMUST00000114499	ENSMUSG00000031365	2.56669	4.47111	-1.74197	0.178018	0.509705	FALSE	Zfp275	zinc finger protein 275 [Source:MGI Symbol;Acc:MGI:1350985]
ENSMUST00000033731	ENSMUSG00000031365	3.12085	2.76441	1.12894	0.991427	0.995219	FALSE	Zfp275	zinc finger protein 275 [Source:MGI Symbol;Acc:MGI:1350985]
ENSMUST00000174462	ENSMUSG00000060510	29.0755	24.0165	1.21065	0.0260268	0.181963	FALSE	Zfp266	zinc finger protein 266 [Source:MGI Symbol;Acc:MGI:1924769]
ENSMUST00000050735	ENSMUSG00000049421	4.36492	3.70326	1.17867	0.881339	0.947166	FALSE	Zfp260	zinc finger protein 260 [Source:MGI Symbol;Acc:MGI:1347071]
ENSMUST00000159569	ENSMUSG00000063108	2.52772	1.10268	2.29235	0.483506	0.747692	FALSE	Zfp26	zinc finger protein 26 [Source:MGI Symbol;Acc:MGI:99173]
TCONS_00028221	ENSMUSG00000063108	1.86347	2.25038	-1.20763	0.589642	0.797221	FALSE	Zfp26	zinc finger protein 26 [Source:MGI Symbol;Acc:MGI:99173]
ENSMUST00000066497	ENSMUSG00000051469	15.1973	15.5108	-1.02062	0.421904	0.713294	FALSE	Zfp24	zinc finger protein 24 [Source:MGI Symbol;Acc:MGI:1929704]
ENSMUST00000172088	ENSMUSG00000042097	3.07928	1.37385	2.24135	0.432781	0.714595	FALSE	Zfp239	zinc finger protein 239 [Source:MGI Symbol;Acc:MGI:1306812]
ENSMUST00000136316	ENSMUSG00000042097	1.03391	1.31826	-1.27503	0.720792	0.874062	FALSE	Zfp239	zinc finger protein 239 [Source:MGI Symbol;Acc:MGI:1306812]
TCONS_00022560	ENSMUSG00000042097	4.97355	4.45279	1.11695	0.945771	0.977572	FALSE	Zfp239	zinc finger protein 239 [Source:MGI Symbol;Acc:MGI:1306812]
ENSMUST00000228580	ENSMUSG00000049295	5.38278	5.15491	1.04421	0.662261	0.839677	FALSE	Zfp219	zinc finger protein 219 [Source:MGI Symbol;Acc:MGI:1917140]
ENSMUST00000067549	ENSMUSG00000049295	2.84794	3.2618	-1.14532	0.693375	0.859088	FALSE	Zfp219	zinc finger protein 219 [Source:MGI Symbol;Acc:MGI:1917140]
TCONS_00016573	ENSMUSG00000052056	1.3466	2.76302	-2.05186	0.352332	0.658029	FALSE	Zfp217	zinc finger protein 217 [Source:MGI Symbol;Acc:MGI:2685408]
ENSMUST00000063710	ENSMUSG00000052056	7.43854	6.0315	1.23328	0.400294	0.698548	FALSE	Zfp217	zinc finger protein 217 [Source:MGI Symbol;Acc:MGI:2685408]
ENSMUST00000053740	ENSMUSG00000017421	27.1397	32.4622	-1.19611	0.00967521	0.111041	FALSE	Zfp207	zinc finger protein 207 [Source:MGI Symbol;Acc:MGI:1340045]
ENSMUST00000017567	ENSMUSG00000017421	4.22458	3.62317	1.16599	0.652793	0.834497	FALSE	Zfp207	zinc finger protein 207 [Source:MGI Symbol;Acc:MGI:1340045]
TCONS_00011110	ENSMUSG00000067942	3.97318	4.23093	-1.06487	0.761492	0.894095	FALSE	Zfp160	zinc finger protein 160 [Source:MGI Symbol;Acc:MGI:108187]
ENSMUST00000165418	ENSMUSG00000022811	9.20367	7.59063	1.2125	0.327717	0.636722	FALSE	Zfp148	zinc finger protein 148 [Source:MGI Symbol;Acc:MGI:1332234]
TCONS_00024933	ENSMUSG00000037029	0.158391	3.58052	-22.6056	0.0387457	0.224676	FALSE	Zfp146	zinc finger protein 146 [Source:MGI Symbol;Acc:MGI:1347092]
ENSMUST00000062181	ENSMUSG00000037029	11.0472	10.1274	1.09082	0.400929	0.69891	FALSE	Zfp146	zinc finger protein 146 [Source:MGI Symbol;Acc:MGI:1347092]
TCONS_00024932	ENSMUSG00000037029	8.67123	7.37102	1.17639	0.486672	0.747692	FALSE	Zfp146	zinc finger protein 146 [Source:MGI Symbol;Acc:MGI:1347092]
ENSMUST00000211798	ENSMUSG00000061079	2.99424	2.50265	1.19643	0.783471	0.905048	FALSE	Zfp143	zinc finger protein 143 [Source:MGI Symbol;Acc:MGI:1277969]
ENSMUST00000127921	ENSMUSG00000026135	2.13439	1.44525	1.47684	0.746058	0.886176	FALSE	Zfp142	zinc finger protein 142 [Source:MGI Symbol;Acc:MGI:1924514]
ENSMUST00000223722	ENSMUSG00000094870	6.2266	0.759689	8.19626	0.0224682	0.169213	TRUE	Zfp131	zinc finger protein 131 [Source:MGI Symbol;Acc:MGI:1919715]
ENSMUST00000177916	ENSMUSG00000094870	0.057407	1.30768	-22.7791	0.102579	0.381768	FALSE	Zfp131	zinc finger protein 131 [Source:MGI Symbol;Acc:MGI:1919715]
ENSMUST00000223813	ENSMUSG00000094870	2.26886	4.56499	-2.01202	0.464632	0.735423	FALSE	Zfp131	zinc finger protein 131 [Source:MGI Symbol;Acc:MGI:1919715]
ENSMUST00000032591	ENSMUSG00000029587	1.0863	1.72036	-1.58368	0.430217	0.714068	FALSE	Zfp12	zinc finger protein 12 [Source:MGI Symbol;Acc:MGI:99157]
ENSMUST00000004614	ENSMUSG00000058638	5.05847	4.3151	1.17227	0.988013	0.994266	FALSE	Zfp110	zinc finger protein 110 [Source:MGI Symbol;Acc:MGI:1890378]
ENSMUST00000171215	ENSMUSG00000027288	1.43478	2.55077	-1.77782	0.435552	0.715606	FALSE	Zfp106	zinc finger protein 106 [Source:MGI Symbol;Acc:MGI:1270153]
TCONS_00016166	ENSMUSG00000027288	20.0718	18.9557	1.05888	0.862846	0.938989	FALSE	Zfp106	zinc finger protein 106 [Source:MGI Symbol;Acc:MGI:1270153]
ENSMUST00000055241	ENSMUSG00000027288	16.1372	12.5817	1.2826	0.975521	0.989162	FALSE	Zfp106	zinc finger protein 106 [Source:MGI Symbol;Acc:MGI:1270153]
ENSMUST00000029199	ENSMUSG00000027663	30.1788	23.431	1.28799	0.00713204	0.0960502	FALSE	Zmat3	zinc finger matrin type 3 [Source:MGI Symbol;Acc:MGI:1195270]
ENSMUST00000025707	ENSMUSG00000024792	5.98523	4.7224	1.26741	0.0713671	0.316257	FALSE	Zfpl1	zinc finger like protein 1 [Source:MGI Symbol;Acc:MGI:1891017]
ENSMUST00000068415	ENSMUSG00000026872	0.406267	4.84866	-11.9347	0.000835657	0.0456109	TRUE	Zeb2	zinc finger E-box binding homeobox 2 [Source:MGI Symbol;Acc:MGI:1344407]
ENSMUST00000176438	ENSMUSG00000026872	6.40644	2.17518	2.94525	0.00386147	0.0758444	TRUE	Zeb2	zinc finger E-box binding homeobox 2 [Source:MGI Symbol;Acc:MGI:1344407]
TCONS_00015792	ENSMUSG00000026872	7.00359	7.56048	-1.07951	0.685937	0.853833	FALSE	Zeb2	zinc finger E-box binding homeobox 2 [Source:MGI Symbol;Acc:MGI:1344407]
ENSMUST00000201804	ENSMUSG00000026872	10.8731	12.5039	-1.14998	0.757977	0.892342	FALSE	Zeb2	zinc finger E-box binding homeobox 2 [Source:MGI Symbol;Acc:MGI:1344407]
ENSMUST00000076836	ENSMUSG00000026872	16.3956	12.6316	1.29799	0.816123	0.918728	FALSE	Zeb2	zinc finger E-box binding homeobox 2 [Source:MGI Symbol;Acc:MGI:1344407]
ENSMUST00000218275	ENSMUSG00000039531	1.52343	0.272431	5.59198	0.402266	0.699546	FALSE	Zufsp	zinc finger containing ubiquitin peptidase 1 [Source:MGI Symbol;Acc:MGI:1919830]
TCONS_00009896	ENSMUSG00000022635	2.68818	2.99865	-1.1155	0.212203	0.54826	FALSE	Zcrb1	zinc finger CCHC-type and RNA binding motif 1 [Source:MGI Symbol;Acc:MGI:1914447]
ENSMUST00000161955	ENSMUSG00000022635	3.94342	0.927823	4.25018	0.217752	0.553687	FALSE	Zcrb1	zinc finger CCHC-type and RNA binding motif 1 [Source:MGI Symbol;Acc:MGI:1914447]
ENSMUST00000162160	ENSMUSG00000022635	0.168966	4.36232	-25.8178	0.342376	0.649245	FALSE	Zcrb1	zinc finger CCHC-type and RNA binding motif 1 [Source:MGI Symbol;Acc:MGI:1914447]
ENSMUST00000076070	ENSMUSG00000022635	1.08012	1.85292	-1.71548	0.591426	0.798188	FALSE	Zcrb1	zinc finger CCHC-type and RNA binding motif 1 [Source:MGI Symbol;Acc:MGI:1914447]
ENSMUST00000161409	ENSMUSG00000022635	4.9961	5.18202	-1.03721	0.722106	0.874821	FALSE	Zcrb1	zinc finger CCHC-type and RNA binding motif 1 [Source:MGI Symbol;Acc:MGI:1914447]
TCONS_00023750	ENSMUSG00000059273	1.41986	1.99563	-1.40551	0.415975	0.709727	FALSE	Zc3h4	zinc finger CCCH-type containing 4 [Source:MGI Symbol;Acc:MGI:2682314]
ENSMUST00000098789	ENSMUSG00000059273	3.61754	2.98459	1.21207	0.541527	0.767156	FALSE	Zc3h4	zinc finger CCCH-type containing 4 [Source:MGI Symbol;Acc:MGI:2682314]
TCONS_00023749	ENSMUSG00000059273	7.80941	7.47335	1.04497	0.783829	0.905172	FALSE	Zc3h4	zinc finger CCCH-type containing 4 [Source:MGI Symbol;Acc:MGI:2682314]
TCONS_00026457	ENSMUSG00000017478	0.0267287	2.37951	-89.0248	0.00642323	0.0926941	TRUE	Zc3h18	zinc finger CCCH-type containing 18 [Source:MGI Symbol;Acc:MGI:1923264]
TCONS_00026458	ENSMUSG00000017478	8.975	6.88723	1.30314	0.0854551	0.346982	FALSE	Zc3h18	zinc finger CCCH-type containing 18 [Source:MGI Symbol;Acc:MGI:1923264]
ENSMUST00000081591	ENSMUSG00000027091	26.147	29.4671	-1.12698	0.363287	0.667806	FALSE	Zc3h15	zinc finger CCCH-type containing 15 [Source:MGI Symbol;Acc:MGI:1919747]
ENSMUST00000134789	ENSMUSG00000027091	8.09422	9.48727	-1.1721	0.911824	0.961044	FALSE	Zc3h15	zinc finger CCCH-type containing 15 [Source:MGI Symbol;Acc:MGI:1919747]
ENSMUST00000114900	ENSMUSG00000029826	47.2813	36.4788	1.29613	0.092935	0.362484	FALSE	Zc3hav1	zinc finger CCCH type, antiviral 1 [Source:MGI Symbol;Acc:MGI:1926031]
TCONS_00009220	ENSMUSG00000022390	1.92708	2.02287	-1.04971	0.738079	0.88284	FALSE	Zc3h7b	zinc finger CCCH type containing 7B [Source:MGI Symbol;Acc:MGI:1328310]
ENSMUST00000109554	ENSMUSG00000022390	16.7307	15.9541	1.04868	0.784048	0.905273	FALSE	Zc3h7b	zinc finger CCCH type containing 7B [Source:MGI Symbol;Acc:MGI:1328310]
ENSMUST00000037633	ENSMUSG00000037965	12.6342	10.3807	1.21708	0.00220503	0.0592441	FALSE	Zc3h7a	zinc finger CCCH type containing 7 A [Source:MGI Symbol;Acc:MGI:2445044]
ENSMUST00000155340	ENSMUSG00000037965	4.02477	2.91114	1.38254	0.147091	0.465599	FALSE	Zc3h7a	zinc finger CCCH type containing 7 A [Source:MGI Symbol;Acc:MGI:2445044]
TCONS_00010606	ENSMUSG00000037965	20.0028	18.8902	1.0589	0.568013	0.783992	FALSE	Zc3h7a	zinc finger CCCH type containing 7 A [Source:MGI Symbol;Acc:MGI:2445044]
TCONS_00009632	ENSMUSG00000075600	1.37514	0.58767	2.33999	0.676449	0.848795	FALSE	Zc3h3	zinc finger CCCH type containing 3 [Source:MGI Symbol;Acc:MGI:2663721]
ENSMUST00000057000	ENSMUSG00000021012	1.63062	3.41923	-2.09689	0.282866	0.604301	FALSE	Zc3h14	zinc finger CCCH type containing 14 [Source:MGI Symbol;Acc:MGI:1919824]
ENSMUST00000110105	ENSMUSG00000021012	21.2158	20.5096	1.03443	0.342043	0.64903	FALSE	Zc3h14	zinc finger CCCH type containing 14 [Source:MGI Symbol;Acc:MGI:1919824]
ENSMUST00000192775	ENSMUSG00000102976	11.5448	8.42119	1.37092	0.0185395	0.153454	FALSE	Zc3h11a	zinc finger CCCH type containing 11A [Source:MGI Symbol;Acc:MGI:1917829]
ENSMUST00000195067	ENSMUSG00000102976	3.74115	1.85587	2.01585	0.320353	0.629964	FALSE	Zc3h11a	zinc finger CCCH type containing 11A [Source:MGI Symbol;Acc:MGI:1917829]
TCONS_00001487	ENSMUSG00000102976	5.14375	1.86448	2.75882	0.689991	0.856613	FALSE	Zc3h11a	zinc finger CCCH type containing 11A [Source:MGI Symbol;Acc:MGI:1917829]
TCONS_00001488	ENSMUSG00000102976	3.77483	4.3297	-1.14699	0.932929	0.971402	FALSE	Zc3h11a	zinc finger CCCH type containing 11A [Source:MGI Symbol;Acc:MGI:1917829]
TCONS_00001491	ENSMUSG00000102976	3.99086	3.8584	1.03433	0.950342	0.979665	FALSE	Zc3h11a	zinc finger CCCH type containing 11A [Source:MGI Symbol;Acc:MGI:1917829]
TCONS_00007362	ENSMUSG00000022228	3.22547	1.81663	1.77553	0.298292	0.610539	FALSE	Zscan26	zinc finger and SCAN domain containing 26 [Source:MGI Symbol;Acc:MGI:3531417]
ENSMUST00000199563	ENSMUSG00000070420	2.08155	0.911306	2.28414	0.332365	0.641522	FALSE	Zscan25	zinc finger and SCAN domain containing 25 [Source:MGI Symbol;Acc:MGI:3647079]
ENSMUST00000119989	ENSMUSG00000054715	1.90763	0.349227	5.46243	0.137039	0.448694	FALSE	Zscan22	zinc finger and SCAN domain containing 22 [Source:MGI Symbol;Acc:MGI:2443312]
ENSMUST00000110959	ENSMUSG00000037017	0.83417	2.03208	-2.43604	0.402864	0.699867	FALSE	Zscan21	zinc finger and SCAN domain containing 21 [Source:MGI Symbol;Acc:MGI:99182]
ENSMUST00000062350	ENSMUSG00000037017	7.43484	6.10521	1.21779	0.882729	0.94759	FALSE	Zscan21	zinc finger and SCAN domain containing 21 [Source:MGI Symbol;Acc:MGI:99182]
TCONS_00023721	ENSMUSG00000070822	2.35146	0.147834	15.9061	0.440964	0.718466	FALSE	Zscan18	zinc finger and SCAN domain containing 18 [Source:MGI Symbol;Acc:MGI:3643810]
ENSMUST00000029677	ENSMUSG00000028042	12.4008	7.92605	1.56456	0.0333193	0.206922	FALSE	Zbtb7b	zinc finger and BTB domain containing 7B [Source:MGI Symbol;Acc:MGI:102755]
ENSMUST00000048128	ENSMUSG00000035011	11.1405	6.73636	1.65379	0.0834596	0.343059	FALSE	Zbtb7a	zinc finger and BTB domain containing 7a [Source:MGI Symbol;Acc:MGI:1335091]
ENSMUST00000119606	ENSMUSG00000035011	14.6922	4.76966	3.08035	0.132748	0.441	FALSE	Zbtb7a	zinc finger and BTB domain containing 7a [Source:MGI Symbol;Acc:MGI:1335091]
ENSMUST00000112932	ENSMUSG00000066798	8.47113	6.92693	1.22293	0.251023	0.586027	FALSE	Zbtb6	zinc finger and BTB domain containing 6 [Source:MGI Symbol;Acc:MGI:2442998]
ENSMUST00000055028	ENSMUSG00000049657	1.67052	1.14594	1.45778	0.660369	0.83872	FALSE	Zbtb5	zinc finger and BTB domain containing 5 [Source:MGI Symbol;Acc:MGI:1924601]
TCONS_00024738	ENSMUSG00000049600	4.4734	5.64127	-1.26107	0.670444	0.844978	FALSE	Zbtb45	zinc finger and BTB domain containing 45 [Source:MGI Symbol;Acc:MGI:2685003]
TCONS_00027458	ENSMUSG00000047412	3.24995	2.55153	1.27373	0.655491	0.835943	FALSE	Zbtb44	zinc finger and BTB domain containing 44 [Source:MGI Symbol;Acc:MGI:1925123]
ENSMUST00000115222	ENSMUSG00000047412	1.66849	1.34955	1.23633	0.900142	0.955062	FALSE	Zbtb44	zinc finger and BTB domain containing 44 [Source:MGI Symbol;Acc:MGI:1925123]
ENSMUST00000095035	ENSMUSG00000026788	5.44831	4.53841	1.20049	0.277359	0.601474	FALSE	Zbtb43	zinc finger and BTB domain containing 43 [Source:MGI Symbol;Acc:MGI:1919084]
ENSMUST00000028125	ENSMUSG00000026788	1.03422	0.429471	2.40812	0.901032	0.955563	FALSE	Zbtb43	zinc finger and BTB domain containing 43 [Source:MGI Symbol;Acc:MGI:1919084]
ENSMUST00000169593	ENSMUSG00000037638	4.97009	1.87337	2.65303	0.0514339	0.26433	FALSE	Zbtb42	zinc finger and BTB domain containing 42 [Source:MGI Symbol;Acc:MGI:3644133]
TCONS_00000631	ENSMUSG00000033964	3.03116	4.66828	-1.5401	0.202785	0.539521	FALSE	Zbtb41	zinc finger and BTB domain containing 41 [Source:MGI Symbol;Acc:MGI:2444487]
ENSMUST00000200243	ENSMUSG00000033964	3.05679	2.73269	1.1186	0.483987	0.747692	FALSE	Zbtb41	zinc finger and BTB domain containing 41 [Source:MGI Symbol;Acc:MGI:2444487]
ENSMUST00000049583	ENSMUSG00000060862	2.62266	0.009407	278.799	0.201286	0.538216	FALSE	Zbtb40	zinc finger and BTB domain containing 40 [Source:MGI Symbol;Acc:MGI:2682254]
TCONS_00019807	ENSMUSG00000060862	1.43604	1.96886	-1.37103	0.381756	0.683634	FALSE	Zbtb40	zinc finger and BTB domain containing 40 [Source:MGI Symbol;Acc:MGI:2682254]
ENSMUST00000152594	ENSMUSG00000040433	9.73411	7.15213	1.36101	0.026517	0.183642	FALSE	Zbtb38	zinc finger and BTB domain containing 38 [Source:MGI Symbol;Acc:MGI:2442866]
ENSMUST00000126066	ENSMUSG00000040433	0.661784	1.27723	-1.92998	0.407267	0.702773	FALSE	Zbtb38	zinc finger and BTB domain containing 38 [Source:MGI Symbol;Acc:MGI:2442866]
ENSMUST00000131124	ENSMUSG00000048047	7.45571	5.3316	1.3984	0.18327	0.517312	FALSE	Zbtb33	zinc finger and BTB domain containing 33 [Source:MGI Symbol;Acc:MGI:1927290]
ENSMUST00000115142	ENSMUSG00000048047	3.82699	2.87996	1.32883	0.721501	0.874409	FALSE	Zbtb33	zinc finger and BTB domain containing 33 [Source:MGI Symbol;Acc:MGI:1927290]
ENSMUST00000174463	ENSMUSG00000051390	0.765076	1.27949	-1.67237	0.471448	0.740086	FALSE	Zbtb22	zinc finger and BTB domain containing 22 [Source:MGI Symbol;Acc:MGI:1931870]
TCONS_00010367	ENSMUSG00000022708	9.89513	8.5795	1.15335	0.916087	0.96345	FALSE	Zbtb20	zinc finger and BTB domain containing 20 [Source:MGI Symbol;Acc:MGI:1929213]
ENSMUST00000100077	ENSMUSG00000075327	2.1506	2.01982	1.06475	0.842851	0.92849	FALSE	Zbtb2	zinc finger and BTB domain containing 2 [Source:MGI Symbol;Acc:MGI:2685949]
ENSMUST00000077225	ENSMUSG00000063659	1.63767	0.340345	4.81179	0.407485	0.702773	FALSE	Zbtb18	zinc finger and BTB domain containing 18 [Source:MGI Symbol;Acc:MGI:1353609]
ENSMUST00000006377	ENSMUSG00000006215	9.001	10.7825	-1.19792	0.027263	0.186775	FALSE	Zbtb17	zinc finger and BTB domain containing 17 [Source:MGI Symbol;Acc:MGI:107410]
ENSMUST00000112676	ENSMUSG00000049672	2.91229	3.28062	-1.12647	0.437295	0.716415	FALSE	Zbtb14	zinc finger and BTB domain containing 14 [Source:MGI Symbol;Acc:MGI:1195345]
ENSMUST00000062369	ENSMUSG00000049672	1.56547	1.14641	1.36554	0.866314	0.940264	FALSE	Zbtb14	zinc finger and BTB domain containing 14 [Source:MGI Symbol;Acc:MGI:1195345]
ENSMUST00000052778	ENSMUSG00000049823	4.77195	7.46874	-1.56513	0.0378379	0.221431	FALSE	Zbtb12	zinc finger and BTB domain containing 12 [Source:MGI Symbol;Acc:MGI:88133]
TCONS_00009611	ENSMUSG00000022335	2.42871	2.48488	-1.02313	0.595976	0.801256	FALSE	Zfat	zinc finger and AT hook domain containing [Source:MGI Symbol;Acc:MGI:2681865]
ENSMUST00000090840	ENSMUSG00000031370	0.767679	1.19742	-1.55979	0.531402	0.760884	FALSE	Zrsr2	zinc finger (CCCH type), RNA binding motif and serine/arginine rich 2 [Source:MGI Symbol;Acc:MGI:103287]
TCONS_00012857	ENSMUSG00000049090	2.21397	2.83344	-1.2798	0.464661	0.735423	FALSE	Zadh2	zinc binding alcohol dehydrogenase, domain containing 2 [Source:MGI Symbol;Acc:MGI:2444835]
ENSMUST00000060223	ENSMUSG00000049090	7.42127	8.49013	-1.14403	0.709638	0.867693	FALSE	Zadh2	zinc binding alcohol dehydrogenase, domain containing 2 [Source:MGI Symbol;Acc:MGI:2444835]
ENSMUST00000079869	ENSMUSG00000058446	22.8055	14.3419	1.59014	0.00055295	0.0416324	TRUE	Znrf2	zinc and ring finger 2 [Source:MGI Symbol;Acc:MGI:1196246]
ENSMUST00000173506	ENSMUSG00000033545	9.78781	6.3544	1.54032	0.0976308	0.371909	FALSE	Znrf1	zinc and ring finger 1 [Source:MGI Symbol;Acc:MGI:2177308]
TCONS_00026396	ENSMUSG00000033545	0.315329	1.36631	-4.33297	0.117372	0.413257	FALSE	Znrf1	zinc and ring finger 1 [Source:MGI Symbol;Acc:MGI:2177308]
ENSMUST00000095176	ENSMUSG00000033545	1.68039	1.62815	1.03209	0.600942	0.803664	FALSE	Znrf1	zinc and ring finger 1 [Source:MGI Symbol;Acc:MGI:2177308]
ENSMUST00000021692	ENSMUSG00000021264	23.2357	21.9612	1.05804	0.0223646	0.168657	FALSE	Yy1	YY1 transcription factor [Source:MGI Symbol;Acc:MGI:99150]
ENSMUST00000080299	ENSMUSG00000022634	4.69587	6.41286	-1.36564	0.0198262	0.158751	FALSE	Yaf2	YY1 associated factor 2 [Source:MGI Symbol;Acc:MGI:1914307]
ENSMUST00000108345	ENSMUSG00000047213	5.20432	5.83383	-1.12096	0.458822	0.731443	FALSE	Ythdf3	YTH N6-methyladenosine RNA binding protein 3 [Source:MGI Symbol;Acc:MGI:1918850]
TCONS_00016689	ENSMUSG00000047213	5.37818	7.42217	-1.38005	0.541483	0.767156	FALSE	Ythdf3	YTH N6-methyladenosine RNA binding protein 3 [Source:MGI Symbol;Acc:MGI:1918850]
ENSMUST00000108346	ENSMUSG00000047213	10.1338	8.66293	1.16979	0.963596	0.98443	FALSE	Ythdf3	YTH N6-methyladenosine RNA binding protein 3 [Source:MGI Symbol;Acc:MGI:1918850]
ENSMUST00000152796	ENSMUSG00000040025	14.6885	15.2639	-1.03917	0.0171635	0.146411	FALSE	Ythdf2	YTH N6-methyladenosine RNA binding protein 2 [Source:MGI Symbol;Acc:MGI:2444233]
ENSMUST00000037299	ENSMUSG00000038848	23.7026	24.5004	-1.03366	0.103835	0.38444	FALSE	Ythdf1	YTH N6-methyladenosine RNA binding protein 1 [Source:MGI Symbol;Acc:MGI:1917431]
ENSMUST00000102628	ENSMUSG00000028889	18.7079	24.2641	-1.297	0.0348856	0.21129	FALSE	Yrdc	yrdC domain containing (E.coli) [Source:MGI Symbol;Acc:MGI:2387201]
ENSMUST00000028117	ENSMUSG00000026775	35.8066	34.8291	1.02807	0.261728	0.594896	FALSE	Yme1l1	YME1-like 1 (S. cerevisiae) [Source:MGI Symbol;Acc:MGI:1351651]
ENSMUST00000168977	ENSMUSG00000021244	1.79351	2.50778	-1.39825	0.0614296	0.291513	FALSE	Ylpm1	YLP motif containing 1 [Source:MGI Symbol;Acc:MGI:1926195]
ENSMUST00000021670	ENSMUSG00000021244	8.63126	9.08875	-1.053	0.477923	0.74442	FALSE	Ylpm1	YLP motif containing 1 [Source:MGI Symbol;Acc:MGI:1926195]
ENSMUST00000167838	ENSMUSG00000021244	2.01659	2.51824	-1.24876	0.809002	0.915375	FALSE	Ylpm1	YLP motif containing 1 [Source:MGI Symbol;Acc:MGI:1926195]
ENSMUST00000002818	ENSMUSG00000002741	50.5016	55.4291	-1.09757	0.148264	0.467581	FALSE	Ykt6	YKT6 v-SNARE homolog (S. cerevisiae) [Source:MGI Symbol;Acc:MGI:1927550]
TCONS_00026796	ENSMUSG00000048967	2.66223	4.06847	-1.52822	0.296957	0.609542	FALSE	Yjefn3	YjeF N-terminal domain containing 3 [Source:MGI Symbol;Acc:MGI:2681845]
ENSMUST00000045174	ENSMUSG00000039770	10.2197	5.26341	1.94165	0.00174097	0.0549099	TRUE	Ypel5	yippee like 5 [Source:MGI Symbol;Acc:MGI:1916937]
ENSMUST00000038614	ENSMUSG00000042675	5.9955	2.97265	2.01689	0.0490448	0.258085	FALSE	Ypel3	yippee like 3 [Source:MGI Symbol;Acc:MGI:1913340]
ENSMUST00000018571	ENSMUSG00000018427	9.96769	2.71667	3.66909	0.00077682	0.0450616	TRUE	Ypel2	yippee like 2 [Source:MGI Symbol;Acc:MGI:1925114]
ENSMUST00000032809	ENSMUSG00000030588	9.70401	12.536	-1.29183	0.0577917	0.280858	FALSE	Yif1b	Yip1 interacting factor homolog B (S. cerevisiae) [Source:MGI Symbol;Acc:MGI:1924504]
TCONS_00023917	ENSMUSG00000030588	8.70862	9.93408	-1.14072	0.412988	0.707478	FALSE	Yif1b	Yip1 interacting factor homolog B (S. cerevisiae) [Source:MGI Symbol;Acc:MGI:1924504]
ENSMUST00000108238	ENSMUSG00000030588	4.45309	4.08739	1.08947	0.909998	0.960112	FALSE	Yif1b	Yip1 interacting factor homolog B (S. cerevisiae) [Source:MGI Symbol;Acc:MGI:1924504]
ENSMUST00000025811	ENSMUSG00000024875	14.1879	11.3244	1.25285	0.0399002	0.228408	FALSE	Yif1a	Yip1 interacting factor homolog A (S. cerevisiae) [Source:MGI Symbol;Acc:MGI:1915340]
ENSMUST00000054697	ENSMUSG00000047694	12.3601	6.01134	2.05614	0.15157	0.472421	FALSE	Yipf6	Yip1 domain family, member 6 [Source:MGI Symbol;Acc:MGI:1925179]
ENSMUST00000025364	ENSMUSG00000024487	31.4038	26.4169	1.18877	0.417696	0.71065	FALSE	Yipf5	Yip1 domain family, member 5 [Source:MGI Symbol;Acc:MGI:1914430]
ENSMUST00000024873	ENSMUSG00000024072	33.3116	28.8779	1.15353	0.290567	0.604462	FALSE	Yipf4	Yip1 domain family, member 4 [Source:MGI Symbol;Acc:MGI:1915114]
ENSMUST00000095263	ENSMUSG00000071074	27.9555	19.2218	1.45436	0.000234184	0.0380874	FALSE	Yipf3	Yip1 domain family, member 3 [Source:MGI Symbol;Acc:MGI:106280]
ENSMUST00000151488	ENSMUSG00000071074	13.5644	8.61832	1.5739	0.187928	0.524169	FALSE	Yipf3	Yip1 domain family, member 3 [Source:MGI Symbol;Acc:MGI:106280]
ENSMUST00000075693	ENSMUSG00000057375	11.7215	10.4712	1.1194	0.979353	0.990717	FALSE	Yipf1	Yip1 domain family, member 1 [Source:MGI Symbol;Acc:MGI:1915532]
ENSMUST00000174604	ENSMUSG00000053110	1.86941	4.43497	-2.37239	0.05682	0.278922	FALSE	Yap1	yes-associated protein 1 [Source:MGI Symbol;Acc:MGI:103262]
ENSMUST00000086580	ENSMUSG00000053110	40.001	34.7092	1.15246	0.417689	0.71065	FALSE	Yap1	yes-associated protein 1 [Source:MGI Symbol;Acc:MGI:103262]
ENSMUST00000072311	ENSMUSG00000014932	9.8459	6.76643	1.45511	0.0136599	0.131341	FALSE	Yes1	YES proto-oncogene 1, Src family tyrosine kinase [Source:MGI Symbol;Acc:MGI:99147]
TCONS_00010211	ENSMUSG00000041215	2.55868	3.81747	-1.49197	0.289248	0.604372	FALSE	Yeats2	YEATS domain containing 2 [Source:MGI Symbol;Acc:MGI:2447762]
ENSMUST00000115560	ENSMUSG00000041215	3.01706	2.77297	1.08802	0.776552	0.901346	FALSE	Yeats2	YEATS domain containing 2 [Source:MGI Symbol;Acc:MGI:2447762]
ENSMUST00000087865	ENSMUSG00000030189	68.2148	107.149	-1.57076	0.0122175	0.12434	TRUE	Ybx3	Y box protein 3 [Source:MGI Symbol;Acc:MGI:2137670]
ENSMUST00000032309	ENSMUSG00000030189	30.4205	48.2222	-1.58519	0.0428322	0.237784	FALSE	Ybx3	Y box protein 3 [Source:MGI Symbol;Acc:MGI:2137670]
ENSMUST00000127737	ENSMUSG00000028639	3.15934	5.45191	-1.72565	0.0364157	0.21609	FALSE	Ybx1	Y box protein 1 [Source:MGI Symbol;Acc:MGI:99146]
ENSMUST00000079644	ENSMUSG00000028639	36.16	49.2424	-1.36179	0.0726429	0.319343	FALSE	Ybx1	Y box protein 1 [Source:MGI Symbol;Acc:MGI:99146]
TCONS_00019590	ENSMUSG00000028639	10.9152	13.1865	-1.20809	0.342425	0.649245	FALSE	Ybx1	Y box protein 1 [Source:MGI Symbol;Acc:MGI:99146]
ENSMUST00000116349	ENSMUSG00000020868	5.03925	5.76503	-1.14403	0.346276	0.651874	FALSE	Xylt2	xylosyltransferase II [Source:MGI Symbol;Acc:MGI:2444797]
ENSMUST00000153485	ENSMUSG00000020868	1.30036	1.12887	1.15191	0.593324	0.799705	FALSE	Xylt2	xylosyltransferase II [Source:MGI Symbol;Acc:MGI:2444797]
ENSMUST00000064701	ENSMUSG00000021504	19.7106	10.9655	1.79752	0.00604859	0.0901998	TRUE	B4galt7	xylosylprotein beta1,4-galactosyltransferase, polypeptide 7 (galactosyltransferase I) [Source:MGI Symbol;Acc:MGI:2384987]
ENSMUST00000142629	ENSMUSG00000099481	0.635016	1.56349	-2.46212	0.112101	0.402891	FALSE	Xndc1	Xrcc1 N-terminal domain containing 1 [Source:MGI Symbol;Acc:MGI:5546359]
ENSMUST00000106950	ENSMUSG00000099481	1.19405	0.377493	3.16311	0.369585	0.67278	FALSE	Xndc1	Xrcc1 N-terminal domain containing 1 [Source:MGI Symbol;Acc:MGI:5546359]
ENSMUST00000094130	ENSMUSG00000099481	1.75066	2.77576	-1.58555	0.553579	0.774804	FALSE	Xndc1	Xrcc1 N-terminal domain containing 1 [Source:MGI Symbol;Acc:MGI:5546359]
ENSMUST00000069530	ENSMUSG00000022471	5.85436	7.90271	-1.34988	0.310777	0.621403	FALSE	Xrcc6	X-ray repair complementing defective repair in Chinese hamster cells 6 [Source:MGI Symbol;Acc:MGI:95606]
TCONS_00009230	ENSMUSG00000022471	2.91608	3.91708	-1.34327	0.786447	0.906433	FALSE	Xrcc6	X-ray repair complementing defective repair in Chinese hamster cells 6 [Source:MGI Symbol;Acc:MGI:95606]
ENSMUST00000027379	ENSMUSG00000026187	44.4225	34.6861	1.2807	0.00163803	0.0540388	FALSE	Xrcc5	X-ray repair complementing defective repair in Chinese hamster cells 5 [Source:MGI Symbol;Acc:MGI:104517]
TCONS_00007709	ENSMUSG00000021615	2.83033	3.24856	-1.14777	0.726165	0.876786	FALSE	Xrcc4	X-ray repair complementing defective repair in Chinese hamster cells 4 [Source:MGI Symbol;Acc:MGI:1333799]
ENSMUST00000022115	ENSMUSG00000021615	1.01273	0.308195	3.28601	0.851822	0.933189	FALSE	Xrcc4	X-ray repair complementing defective repair in Chinese hamster cells 4 [Source:MGI Symbol;Acc:MGI:1333799]
ENSMUST00000205573	ENSMUSG00000051768	3.10899	6.28874	-2.02276	0.272403	0.601435	FALSE	Xrcc1	X-ray repair complementing defective repair in Chinese hamster cells 1 [Source:MGI Symbol;Acc:MGI:99137]
ENSMUST00000205561	ENSMUSG00000051768	1.59663	1.7636	-1.10458	0.721194	0.874293	FALSE	Xrcc1	X-ray repair complementing defective repair in Chinese hamster cells 1 [Source:MGI Symbol;Acc:MGI:99137]
ENSMUST00000063249	ENSMUSG00000051768	7.88626	5.98488	1.3177	0.873076	0.943662	FALSE	Xrcc1	X-ray repair complementing defective repair in Chinese hamster cells 1 [Source:MGI Symbol;Acc:MGI:99137]
TCONS_00009209	ENSMUSG00000022401	2.97498	4.46924	-1.50228	0.0423935	0.23638	FALSE	Xpnpep3	X-prolyl aminopeptidase 3, mitochondrial [Source:MGI Symbol;Acc:MGI:2445217]
TCONS_00014170	ENSMUSG00000025027	14.5942	16.6891	-1.14354	0.463024	0.734696	FALSE	Xpnpep1	X-prolyl aminopeptidase (aminopeptidase P) 1, soluble [Source:MGI Symbol;Acc:MGI:2180003]
ENSMUST00000183108	ENSMUSG00000025027	19.2425	21.4514	-1.11479	0.965924	0.985165	FALSE	Xpnpep1	X-prolyl aminopeptidase (aminopeptidase P) 1, soluble [Source:MGI Symbol;Acc:MGI:2180003]
ENSMUST00000159909	ENSMUSG00000019470	2.70236	4.40189	-1.6289	0.245918	0.580953	FALSE	Xab2	XPA binding protein 2 [Source:MGI Symbol;Acc:MGI:1914689]
ENSMUST00000019614	ENSMUSG00000019470	7.70167	7.66811	1.00438	0.814361	0.917977	FALSE	Xab2	XPA binding protein 2 [Source:MGI Symbol;Acc:MGI:1914689]
ENSMUST00000061970	ENSMUSG00000031337	2.68868	1.11634	2.40849	0.300185	0.612054	FALSE	Mtm1	X-linked myotubular myopathy gene 1 [Source:MGI Symbol;Acc:MGI:1099452]
ENSMUST00000080839	ENSMUSG00000058147	15.9435	16.8057	-1.05408	0.0427622	0.23775	FALSE	Xlr3c	X-linked lymphocyte-regulated 3C [Source:MGI Symbol;Acc:MGI:3047103]
ENSMUST00000074619	ENSMUSG00000057836	6.26709	6.42358	-1.02497	0.783789	0.905172	FALSE	Xlr3a	X-linked lymphocyte-regulated 3A [Source:MGI Symbol;Acc:MGI:109506]
ENSMUST00000145065	ENSMUSG00000025860	4.52407	2.36133	1.9159	0.595239	0.801043	FALSE	Xiap	X-linked inhibitor of apoptosis [Source:MGI Symbol;Acc:MGI:107572]
ENSMUST00000026978	ENSMUSG00000025860	3.25818	4.24617	-1.30323	0.733587	0.880475	FALSE	Xiap	X-linked inhibitor of apoptosis [Source:MGI Symbol;Acc:MGI:107572]
ENSMUST00000115095	ENSMUSG00000025860	3.45197	2.67224	1.29179	0.819327	0.920536	FALSE	Xiap	X-linked inhibitor of apoptosis [Source:MGI Symbol;Acc:MGI:107572]
ENSMUST00000142380	ENSMUSG00000028329	7.15768	3.80982	1.87874	0.0512283	0.264037	FALSE	Xpa	xeroderma pigmentosum, complementation group A [Source:MGI Symbol;Acc:MGI:99135]
ENSMUST00000027741	ENSMUSG00000026469	11.2162	8.12074	1.38118	0.0905211	0.35763	FALSE	Xpr1	xenotropic and polytropic retrovirus receptor 1 [Source:MGI Symbol;Acc:MGI:97932]
TCONS_00003339	ENSMUSG00000020484	25.1138	33.2723	-1.32486	0.136643	0.447928	FALSE	Xbp1	X-box binding protein 1 [Source:MGI Symbol;Acc:MGI:98970]
ENSMUST00000063084	ENSMUSG00000020484	18.7894	16.7429	1.12223	0.858661	0.93702	FALSE	Xbp1	X-box binding protein 1 [Source:MGI Symbol;Acc:MGI:98970]
ENSMUST00000145588	ENSMUSG00000020484	6.92599	6.65424	1.04084	0.870935	0.942639	FALSE	Xbp1	X-box binding protein 1 [Source:MGI Symbol;Acc:MGI:98970]
ENSMUST00000029380	ENSMUSG00000027803	17.9677	15.0273	1.19567	0.292705	0.605916	FALSE	Wwtr1	WW domain containing transcription regulator 1 [Source:MGI Symbol;Acc:MGI:1917649]
ENSMUST00000166615	ENSMUSG00000031930	10.984	8.85515	1.24041	0.252228	0.586934	FALSE	Wwp2	WW domain containing E3 ubiquitin protein ligase 2 [Source:MGI Symbol;Acc:MGI:1914144]
TCONS_00019153	ENSMUSG00000041058	4.1172	3.46455	1.18838	0.0978897	0.372558	FALSE	Wwp1	WW domain containing E3 ubiquitin protein ligase 1 [Source:MGI Symbol;Acc:MGI:1861728]
ENSMUST00000108246	ENSMUSG00000041058	6.76584	4.55458	1.4855	0.344904	0.651155	FALSE	Wwp1	WW domain containing E3 ubiquitin protein ligase 1 [Source:MGI Symbol;Acc:MGI:1861728]
ENSMUST00000165572	ENSMUSG00000024283	4.22648	8.08993	-1.91411	0.438315	0.717424	FALSE	Wac	WW domain containing adaptor with coiled-coil [Source:MGI Symbol;Acc:MGI:2387357]
TCONS_00012511	ENSMUSG00000024283	2.66764	1.28606	2.07428	0.560196	0.779383	FALSE	Wac	WW domain containing adaptor with coiled-coil [Source:MGI Symbol;Acc:MGI:2387357]
TCONS_00012509	ENSMUSG00000024283	9.01107	10.1007	-1.12092	0.562141	0.780054	FALSE	Wac	WW domain containing adaptor with coiled-coil [Source:MGI Symbol;Acc:MGI:2387357]
ENSMUST00000074919	ENSMUSG00000024283	5.97542	5.59597	1.06781	0.718011	0.872609	FALSE	Wac	WW domain containing adaptor with coiled-coil [Source:MGI Symbol;Acc:MGI:2387357]
ENSMUST00000074628	ENSMUSG00000034341	74.3496	50.6458	1.46803	0.00399823	0.0763539	FALSE	Wbp2	WW domain binding protein 2 [Source:MGI Symbol;Acc:MGI:104709]
ENSMUST00000116514	ENSMUSG00000030216	48.2675	55.2973	-1.14564	0.0888572	0.354757	FALSE	Wbp11	WW domain binding protein 11 [Source:MGI Symbol;Acc:MGI:1891823]
ENSMUST00000111855	ENSMUSG00000047731	4.92569	8.14552	-1.65368	0.346158	0.651727	FALSE	Wbp1l	WW domain binding protein 1 like [Source:MGI Symbol;Acc:MGI:107577]
ENSMUST00000138302	ENSMUSG00000047731	6.22833	3.54248	1.75818	0.43715	0.716297	FALSE	Wbp1l	WW domain binding protein 1 like [Source:MGI Symbol;Acc:MGI:107577]
ENSMUST00000132202	ENSMUSG00000047731	4.30703	4.91648	-1.1415	0.758434	0.892648	FALSE	Wbp1l	WW domain binding protein 1 like [Source:MGI Symbol;Acc:MGI:107577]
ENSMUST00000099376	ENSMUSG00000047731	15.8628	14.3425	1.106	0.89458	0.95378	FALSE	Wbp1l	WW domain binding protein 1 like [Source:MGI Symbol;Acc:MGI:107577]
ENSMUST00000146328	ENSMUSG00000030035	11.717	5.0932	2.30052	0.623982	0.817495	FALSE	Wbp1	WW domain binding protein 1 [Source:MGI Symbol;Acc:MGI:104710]
ENSMUST00000131939	ENSMUSG00000030035	6.27203	4.21236	1.48896	0.872471	0.943437	FALSE	Wbp1	WW domain binding protein 1 [Source:MGI Symbol;Acc:MGI:104710]
ENSMUST00000038537	ENSMUSG00000036459	12.4684	24.453	-1.9612	0.0027836	0.0644751	TRUE	Wtip	WT1-interacting protein [Source:MGI Symbol;Acc:MGI:2141920]
ENSMUST00000200571	ENSMUSG00000028173	7.93348	5.432	1.46051	0.133394	0.442009	FALSE	Wls	wntless WNT ligand secretion mediator [Source:MGI Symbol;Acc:MGI:1915401]
ENSMUST00000197328	ENSMUSG00000028173	6.25636	4.02252	1.55533	0.410657	0.705416	FALSE	Wls	wntless WNT ligand secretion mediator [Source:MGI Symbol;Acc:MGI:1915401]
ENSMUST00000068952	ENSMUSG00000028173	40.5017	39.02	1.03797	0.794913	0.910151	FALSE	Wls	wntless WNT ligand secretion mediator [Source:MGI Symbol;Acc:MGI:1915401]
TCONS_00004204	ENSMUSG00000035112	7.42924	3.81177	1.94902	0.837402	0.927	FALSE	Wnk4	WNK lysine deficient protein kinase 4 [Source:MGI Symbol;Acc:MGI:1917097]
ENSMUST00000103108	ENSMUSG00000035112	4.49153	3.05496	1.47024	0.984586	0.993127	FALSE	Wnk4	WNK lysine deficient protein kinase 4 [Source:MGI Symbol;Acc:MGI:1917097]
ENSMUST00000159397	ENSMUSG00000045962	11.8345	11.643	1.01644	0.173006	0.50293	FALSE	Wnk1	WNK lysine deficient protein kinase 1 [Source:MGI Symbol;Acc:MGI:2442092]
ENSMUST00000203030	ENSMUSG00000045962	27.9013	3.92659	7.10574	0.173622	0.503571	FALSE	Wnk1	WNK lysine deficient protein kinase 1 [Source:MGI Symbol;Acc:MGI:2442092]
ENSMUST00000088646	ENSMUSG00000045962	11.7078	18.9567	-1.61915	0.206357	0.542227	FALSE	Wnk1	WNK lysine deficient protein kinase 1 [Source:MGI Symbol;Acc:MGI:2442092]
TCONS_00023422	ENSMUSG00000045962	1.01218	4.63505	-4.5793	0.378364	0.680298	FALSE	Wnk1	WNK lysine deficient protein kinase 1 [Source:MGI Symbol;Acc:MGI:2442092]
ENSMUST00000088644	ENSMUSG00000045962	3.54203	0.0872947	40.5755	0.568881	0.784536	FALSE	Wnk1	WNK lysine deficient protein kinase 1 [Source:MGI Symbol;Acc:MGI:2442092]
ENSMUST00000159903	ENSMUSG00000045962	8.83883	11.5333	-1.30484	0.57463	0.787604	FALSE	Wnk1	WNK lysine deficient protein kinase 1 [Source:MGI Symbol;Acc:MGI:2442092]
ENSMUST00000060043	ENSMUSG00000045962	1.54511	0.830985	1.85938	0.625192	0.818369	FALSE	Wnk1	WNK lysine deficient protein kinase 1 [Source:MGI Symbol;Acc:MGI:2442092]
TCONS_00023424	ENSMUSG00000045962	29.7822	25.9521	1.14758	0.754525	0.890356	FALSE	Wnk1	WNK lysine deficient protein kinase 1 [Source:MGI Symbol;Acc:MGI:2442092]
ENSMUST00000031695	ENSMUSG00000029684	27.6771	25.0627	1.10431	0.410675	0.705416	FALSE	Wasl	Wiskott-Aldrich syndrome-like (human) [Source:MGI Symbol;Acc:MGI:1920428]
ENSMUST00000159986	ENSMUSG00000060475	6.62849	8.61648	-1.29992	0.466125	0.736159	FALSE	Wtap	Wilms tumour 1-associating protein [Source:MGI Symbol;Acc:MGI:1926395]
TCONS_00011831	ENSMUSG00000060475	5.66197	5.80312	-1.02493	0.862493	0.938909	FALSE	Wtap	Wilms tumour 1-associating protein [Source:MGI Symbol;Acc:MGI:1926395]
ENSMUST00000007007	ENSMUSG00000060475	9.00185	8.52662	1.05574	0.897464	0.954744	FALSE	Wtap	Wilms tumour 1-associating protein [Source:MGI Symbol;Acc:MGI:1926395]
ENSMUST00000169488	ENSMUSG00000024050	0.127972	1.0074	-7.87206	0.476459	0.743366	FALSE	Wiz	widely-interspaced zinc finger motifs [Source:MGI Symbol;Acc:MGI:1332638]
ENSMUST00000168943	ENSMUSG00000024050	9.32955	13.0568	-1.39951	0.58912	0.797027	FALSE	Wiz	widely-interspaced zinc finger motifs [Source:MGI Symbol;Acc:MGI:1332638]
TCONS_00012089	ENSMUSG00000024050	8.72522	7.44849	1.17141	0.925209	0.967384	FALSE	Wiz	widely-interspaced zinc finger motifs [Source:MGI Symbol;Acc:MGI:1332638]
ENSMUST00000063650	ENSMUSG00000039137	2.02286	1.96718	1.0283	0.636273	0.824597	FALSE	Whrn	whirlin [Source:MGI Symbol;Acc:MGI:2682003]
ENSMUST00000033990	ENSMUSG00000031583	3.49956	3.39987	1.02932	0.681124	0.851302	FALSE	Wrn	Werner syndrome RecQ like helicase [Source:MGI Symbol;Acc:MGI:109635]
ENSMUST00000033991	ENSMUSG00000031583	2.51115	1.84295	1.36257	0.996373	0.998048	FALSE	Wrn	Werner syndrome RecQ like helicase [Source:MGI Symbol;Acc:MGI:109635]
ENSMUST00000021832	ENSMUSG00000021400	10.1926	10.9255	-1.0719	0.805286	0.914247	FALSE	Wrnip1	Werner helicase interacting protein 1 [Source:MGI Symbol;Acc:MGI:1926153]
ENSMUST00000033326	ENSMUSG00000031016	7.22208	12.9369	-1.79129	0.000561942	0.0416324	TRUE	Wee1	WEE 1 homolog 1 (S. pombe) [Source:MGI Symbol;Acc:MGI:103075]
TCONS_00015832	ENSMUSG00000026988	1.67412	0.612774	2.73203	0.0545395	0.272959	FALSE	Wdsub1	WD repeat, SAM and U-box domain containing 1 [Source:MGI Symbol;Acc:MGI:1919387]
ENSMUST00000139689	ENSMUSG00000026988	2.24172	1.44473	1.55166	0.162853	0.489861	FALSE	Wdsub1	WD repeat, SAM and U-box domain containing 1 [Source:MGI Symbol;Acc:MGI:1919387]
TCONS_00015831	ENSMUSG00000026988	2.73366	3.11386	-1.13908	0.472725	0.740697	FALSE	Wdsub1	WD repeat, SAM and U-box domain containing 1 [Source:MGI Symbol;Acc:MGI:1919387]
ENSMUST00000036872	ENSMUSG00000029578	21.2632	19.5645	1.08683	0.692451	0.858543	FALSE	Wipi2	WD repeat domain, phosphoinositide interacting 2 [Source:MGI Symbol;Acc:MGI:1923831]
ENSMUST00000103060	ENSMUSG00000041895	7.32701	4.73254	1.54822	0.140858	0.455246	FALSE	Wipi1	WD repeat domain, phosphoinositide interacting 1 [Source:MGI Symbol;Acc:MGI:1261864]
ENSMUST00000047186	ENSMUSG00000041895	6.79039	5.11164	1.32842	0.205787	0.542227	FALSE	Wipi1	WD repeat domain, phosphoinositide interacting 1 [Source:MGI Symbol;Acc:MGI:1261864]
TCONS_00026964	ENSMUSG00000005150	3.69763	4.4531	-1.20431	0.955355	0.981166	FALSE	Wdr83	WD repeat domain containing 83 [Source:MGI Symbol;Acc:MGI:1915086]
ENSMUST00000020490	ENSMUSG00000020257	36.7503	37.8109	-1.02886	0.221801	0.557554	FALSE	Wdr82	WD repeat domain containing 82 [Source:MGI Symbol;Acc:MGI:1924555]
ENSMUST00000046955	ENSMUSG00000078970	7.25544	7.48224	-1.03126	0.138702	0.45159	FALSE	Wdr92	WD repeat domain 92 [Source:MGI Symbol;Acc:MGI:2144224]
TCONS_00022935	ENSMUSG00000058486	3.81028	2.34314	1.62614	0.164388	0.491381	FALSE	Wdr91	WD repeat domain 91 [Source:MGI Symbol;Acc:MGI:2141558]
TCONS_00022936	ENSMUSG00000058486	4.20226	3.20421	1.31148	0.897649	0.954744	FALSE	Wdr91	WD repeat domain 91 [Source:MGI Symbol;Acc:MGI:2141558]
ENSMUST00000081214	ENSMUSG00000058486	0.649689	4.57962	-7.04895	0.901142	0.955563	FALSE	Wdr91	WD repeat domain 91 [Source:MGI Symbol;Acc:MGI:2141558]
ENSMUST00000062370	ENSMUSG00000045690	5.20075	13.0102	-2.5016	0.213574	0.54957	FALSE	Wdr89	WD repeat domain 89 [Source:MGI Symbol;Acc:MGI:1919588]
ENSMUST00000127464	ENSMUSG00000000561	10.3671	21.3981	-2.06404	0.396115	0.694684	FALSE	Wdr77	WD repeat domain 77 [Source:MGI Symbol;Acc:MGI:1917715]
ENSMUST00000010278	ENSMUSG00000000561	2.58109	3.10381	-1.20252	0.425383	0.714068	FALSE	Wdr77	WD repeat domain 77 [Source:MGI Symbol;Acc:MGI:1917715]
ENSMUST00000128005	ENSMUSG00000000561	2.18454	2.35883	-1.07978	0.657874	0.837493	FALSE	Wdr77	WD repeat domain 77 [Source:MGI Symbol;Acc:MGI:1917715]
ENSMUST00000110602	ENSMUSG00000027242	4.27142	8.13112	-1.90361	0.00066716	0.0425505	TRUE	Wdr76	WD repeat domain 76 [Source:MGI Symbol;Acc:MGI:1926186]
ENSMUST00000027139	ENSMUSG00000025995	8.1832	12.5996	-1.53969	0.0358356	0.214573	FALSE	Wdr75	WD repeat domain 75 [Source:MGI Symbol;Acc:MGI:1920924]
ENSMUST00000142145	ENSMUSG00000025995	1.5529	2.73816	-1.76326	0.135538	0.445721	FALSE	Wdr75	WD repeat domain 75 [Source:MGI Symbol;Acc:MGI:1920924]
ENSMUST00000154436	ENSMUSG00000025995	9.86441	10.8977	-1.10475	0.220201	0.555806	FALSE	Wdr75	WD repeat domain 75 [Source:MGI Symbol;Acc:MGI:1920924]
ENSMUST00000049424	ENSMUSG00000042729	11.1081	9.3458	1.18856	0.371074	0.673892	FALSE	Wdr74	WD repeat domain 74 [Source:MGI Symbol;Acc:MGI:2147427]
ENSMUST00000131651	ENSMUSG00000025722	5.79501	8.52359	-1.47085	0.544819	0.768987	FALSE	Wdr73	WD repeat domain 73 [Source:MGI Symbol;Acc:MGI:1919218]
ENSMUST00000045766	ENSMUSG00000039828	1.11839	2.58821	-2.31422	0.169093	0.497784	FALSE	Wdr70	WD repeat domain 70 [Source:MGI Symbol;Acc:MGI:1921020]
TCONS_00009466	ENSMUSG00000039828	3.16309	3.19337	-1.00957	0.859421	0.937345	FALSE	Wdr70	WD repeat domain 70 [Source:MGI Symbol;Acc:MGI:1921020]
TCONS_00012750	ENSMUSG00000040560	12.2485	7.94364	1.54193	0.00138939	0.052791	TRUE	Wdr7	WD repeat domain 7 [Source:MGI Symbol;Acc:MGI:1860197]
TCONS_00024937	ENSMUSG00000037020	5.02859	4.89571	1.02714	0.842283	0.928459	FALSE	Wdr62	WD repeat domain 62 [Source:MGI Symbol;Acc:MGI:1923696]
ENSMUST00000121204	ENSMUSG00000061559	6.84319	10.501	-1.53452	0.589643	0.797221	FALSE	Wdr61	WD repeat domain 61 [Source:MGI Symbol;Acc:MGI:1917493]
ENSMUST00000051822	ENSMUSG00000061559	15.6724	15.2466	1.02793	0.695176	0.859916	FALSE	Wdr61	WD repeat domain 61 [Source:MGI Symbol;Acc:MGI:1917493]
ENSMUST00000068700	ENSMUSG00000066357	60.3306	47.9742	1.25756	0.0493721	0.259185	FALSE	Wdr6	WD repeat domain 6 [Source:MGI Symbol;Acc:MGI:1930140]
ENSMUST00000034437	ENSMUSG00000031959	1.32693	0.00942133	140.843	0.510184	0.747692	FALSE	Wdr59	WD repeat domain 59 [Source:MGI Symbol;Acc:MGI:2442115]
ENSMUST00000038193	ENSMUSG00000031959	3.48452	4.67551	-1.3418	0.591744	0.798357	FALSE	Wdr59	WD repeat domain 59 [Source:MGI Symbol;Acc:MGI:2442115]
ENSMUST00000049323	ENSMUSG00000042660	11.5665	13.1802	-1.13952	0.0934382	0.363648	FALSE	Wdr55	WD repeat domain 55 [Source:MGI Symbol;Acc:MGI:1915186]
ENSMUST00000141820	ENSMUSG00000022787	0.737094	0.721618	1.02145	0.598533	0.802671	FALSE	Wdr53	WD repeat domain 53 [Source:MGI Symbol;Acc:MGI:1916230]
ENSMUST00000023474	ENSMUSG00000022787	2.15698	2.15405	1.00136	0.60181	0.80383	FALSE	Wdr53	WD repeat domain 53 [Source:MGI Symbol;Acc:MGI:1916230]
ENSMUST00000113952	ENSMUSG00000026917	15.5073	18.4766	-1.19148	0.00186235	0.0558367	FALSE	Wdr5	WD repeat domain 5 [Source:MGI Symbol;Acc:MGI:2155884]
ENSMUST00000217472	ENSMUSG00000032512	9.62003	3.2396	2.96951	0.0973451	0.371855	FALSE	Wdr48	WD repeat domain 48 [Source:MGI Symbol;Acc:MGI:1914811]
ENSMUST00000036561	ENSMUSG00000032512	13.2481	8.67414	1.52731	0.222769	0.559053	FALSE	Wdr48	WD repeat domain 48 [Source:MGI Symbol;Acc:MGI:1914811]
ENSMUST00000215307	ENSMUSG00000032512	0.812325	4.77726	-5.88096	0.513095	0.749211	FALSE	Wdr48	WD repeat domain 48 [Source:MGI Symbol;Acc:MGI:1914811]
TCONS_00028112	ENSMUSG00000032512	9.01675	7.84828	1.14888	0.642837	0.828566	FALSE	Wdr48	WD repeat domain 48 [Source:MGI Symbol;Acc:MGI:1914811]
ENSMUST00000051145	ENSMUSG00000040389	5.58536	3.67687	1.51905	0.00271178	0.0642514	TRUE	Wdr47	WD repeat domain 47 [Source:MGI Symbol;Acc:MGI:2139593]
ENSMUST00000025170	ENSMUSG00000024312	12.0003	16.9628	-1.41353	0.00127149	0.0515388	FALSE	Wdr46	WD repeat domain 46 [Source:MGI Symbol;Acc:MGI:1931871]
ENSMUST00000026173	ENSMUSG00000025173	24.4588	29.3845	-1.20139	0.115529	0.410357	FALSE	Wdr45b	WD repeat domain 45B [Source:MGI Symbol;Acc:MGI:1914090]
ENSMUST00000115689	ENSMUSG00000039382	1.12391	6.11683	-5.44247	0.240334	0.577077	FALSE	Wdr45	WD repeat domain 45 [Source:MGI Symbol;Acc:MGI:1859606]
ENSMUST00000115688	ENSMUSG00000039382	5.89481	2.33518	2.52435	0.351692	0.657727	FALSE	Wdr45	WD repeat domain 45 [Source:MGI Symbol;Acc:MGI:1859606]
ENSMUST00000115687	ENSMUSG00000039382	3.13343	0.00177433	1765.98	0.510314	0.747692	FALSE	Wdr45	WD repeat domain 45 [Source:MGI Symbol;Acc:MGI:1859606]
ENSMUST00000047086	ENSMUSG00000041057	16.5342	20.7437	-1.25459	0.00153561	0.0534264	FALSE	Wdr43	WD repeat domain 43 [Source:MGI Symbol;Acc:MGI:1919765]
ENSMUST00000171171	ENSMUSG00000024037	2.31404	4.03932	-1.74557	0.247023	0.581835	FALSE	Wdr4	WD repeat domain 4 [Source:MGI Symbol;Acc:MGI:1889002]
ENSMUST00000172284	ENSMUSG00000024037	4.79294	5.89091	-1.22908	0.530097	0.760264	FALSE	Wdr4	WD repeat domain 4 [Source:MGI Symbol;Acc:MGI:1889002]
ENSMUST00000021572	ENSMUSG00000021147	3.97689	1.07691	3.69288	0.182361	0.516261	FALSE	Wdr37	WD repeat domain 37 [Source:MGI Symbol;Acc:MGI:1920393]
ENSMUST00000054251	ENSMUSG00000021147	2.39676	3.43754	-1.43424	0.471126	0.739939	FALSE	Wdr37	WD repeat domain 37 [Source:MGI Symbol;Acc:MGI:1920393]
TCONS_00012589	ENSMUSG00000038299	9.64154	11.9686	-1.24136	0.166718	0.494652	FALSE	Wdr36	WD repeat domain 36 [Source:MGI Symbol;Acc:MGI:1917819]
ENSMUST00000053663	ENSMUSG00000038299	4.33992	6.65435	-1.53329	0.202982	0.539548	FALSE	Wdr36	WD repeat domain 36 [Source:MGI Symbol;Acc:MGI:1917819]
ENSMUST00000166214	ENSMUSG00000038299	3.49629	1.53419	2.27892	0.233155	0.57091	FALSE	Wdr36	WD repeat domain 36 [Source:MGI Symbol;Acc:MGI:1917819]
TCONS_00015658	ENSMUSG00000039715	8.12484	2.21989	3.66002	0.11368	0.406142	FALSE	Wdr34	WD repeat domain 34 [Source:MGI Symbol;Acc:MGI:1919070]
TCONS_00015657	ENSMUSG00000039715	2.10938	6.40712	-3.03745	0.176828	0.507969	FALSE	Wdr34	WD repeat domain 34 [Source:MGI Symbol;Acc:MGI:1919070]
TCONS_00015656	ENSMUSG00000039715	1.07789	9.87e-05	10924.5	0.320743	0.630281	FALSE	Wdr34	WD repeat domain 34 [Source:MGI Symbol;Acc:MGI:1919070]
ENSMUST00000052120	ENSMUSG00000033285	12.209	15.1271	-1.23901	0.543291	0.767946	FALSE	Wdr3	WD repeat domain 3 [Source:MGI Symbol;Acc:MGI:2443143]
TCONS_00017904	ENSMUSG00000033285	3.04542	2.07206	1.46975	0.860337	0.93796	FALSE	Wdr3	WD repeat domain 3 [Source:MGI Symbol;Acc:MGI:2443143]
ENSMUST00000162819	ENSMUSG00000038733	7.92221	2.60537	3.04072	0.197391	0.536035	FALSE	Wdr26	WD repeat domain 26 [Source:MGI Symbol;Acc:MGI:1923825]
TCONS_00001749	ENSMUSG00000038733	11.1833	9.195	1.21623	0.312695	0.622957	FALSE	Wdr26	WD repeat domain 26 [Source:MGI Symbol;Acc:MGI:1923825]
ENSMUST00000162963	ENSMUSG00000038733	20.3149	12.2152	1.66308	0.396152	0.694684	FALSE	Wdr26	WD repeat domain 26 [Source:MGI Symbol;Acc:MGI:1923825]
ENSMUST00000036329	ENSMUSG00000038733	1.06457	0.942353	1.12969	0.405028	0.701417	FALSE	Wdr26	WD repeat domain 26 [Source:MGI Symbol;Acc:MGI:1923825]
ENSMUST00000045247	ENSMUSG00000035754	8.39486	10.8181	-1.28866	0.0112955	0.119645	FALSE	Wdr18	WD repeat domain 18 [Source:MGI Symbol;Acc:MGI:2158400]
ENSMUST00000130832	ENSMUSG00000031166	6.60238	3.87322	1.70462	0.00391365	0.0762153	TRUE	Wdr13	WD repeat domain 13 [Source:MGI Symbol;Acc:MGI:1914661]
TCONS_00001188	ENSMUSG00000026019	0.125472	1.62274	-12.9331	0.339275	0.646466	FALSE	Wdr12	WD repeat domain 12 [Source:MGI Symbol;Acc:MGI:1927241]
ENSMUST00000117438	ENSMUSG00000026019	2.72206	3.51255	-1.2904	0.892322	0.952755	FALSE	Wdr12	WD repeat domain 12 [Source:MGI Symbol;Acc:MGI:1927241]
ENSMUST00000140877	ENSMUSG00000042055	7.15342	7.82573	-1.09398	0.295363	0.608005	FALSE	Wdr11	WD repeat domain 11 [Source:MGI Symbol;Acc:MGI:1920230]
ENSMUST00000005234	ENSMUSG00000005103	4.9261	9.69053	-1.96718	0.271432	0.601435	FALSE	Wdr1	WD repeat domain 1 [Source:MGI Symbol;Acc:MGI:1337100]
TCONS_00021189	ENSMUSG00000005103	48.446	45.5202	1.06427	0.734163	0.880847	FALSE	Wdr1	WD repeat domain 1 [Source:MGI Symbol;Acc:MGI:1337100]
TCONS_00019044	ENSMUSG00000029029	0.316685	1.9594	-6.18723	0.188324	0.52481	FALSE	Wrap73	WD repeat containing, antisense to Trp73 [Source:MGI Symbol;Acc:MGI:1891749]
TCONS_00019043	ENSMUSG00000029029	1.69343	0.646893	2.61779	0.391881	0.691771	FALSE	Wrap73	WD repeat containing, antisense to Trp73 [Source:MGI Symbol;Acc:MGI:1891749]
TCONS_00004974	ENSMUSG00000041346	1.44359	3.07047	-2.12697	0.0638301	0.298282	FALSE	Wrap53	WD repeat containing, antisense to Trp53 [Source:MGI Symbol;Acc:MGI:2384933]
ENSMUST00000048139	ENSMUSG00000041346	3.57031	2.73904	1.30349	0.132644	0.440849	FALSE	Wrap53	WD repeat containing, antisense to Trp53 [Source:MGI Symbol;Acc:MGI:2384933]
ENSMUST00000020568	ENSMUSG00000020319	2.15219	0.772672	2.78539	0.372177	0.67491	FALSE	Wdpcp	WD repeat containing planar cell polarity effector [Source:MGI Symbol;Acc:MGI:2144467]
ENSMUST00000111959	ENSMUSG00000029364	2.12252	0.733772	2.89261	0.367281	0.670874	FALSE	Wsb2	WD repeat and SOCS box-containing 2 [Source:MGI Symbol;Acc:MGI:2144041]
ENSMUST00000031309	ENSMUSG00000029364	93.6947	133.468	-1.4245	0.442502	0.719293	FALSE	Wsb2	WD repeat and SOCS box-containing 2 [Source:MGI Symbol;Acc:MGI:2144041]
ENSMUST00000149669	ENSMUSG00000029364	3.25274	1.74671	1.86221	0.457353	0.730369	FALSE	Wsb2	WD repeat and SOCS box-containing 2 [Source:MGI Symbol;Acc:MGI:2144041]
ENSMUST00000138071	ENSMUSG00000029364	1.16494	0.114451	10.1785	0.504212	0.747692	FALSE	Wsb2	WD repeat and SOCS box-containing 2 [Source:MGI Symbol;Acc:MGI:2144041]
TCONS_00020569	ENSMUSG00000029364	15.9696	3.59011	4.44821	0.507117	0.747692	FALSE	Wsb2	WD repeat and SOCS box-containing 2 [Source:MGI Symbol;Acc:MGI:2144041]
ENSMUST00000017821	ENSMUSG00000017677	21.6134	20.684	1.04493	0.924775	0.967238	FALSE	Wsb1	WD repeat and SOCS box-containing 1 [Source:MGI Symbol;Acc:MGI:1926139]
ENSMUST00000150416	ENSMUSG00000017677	2.4737	2.45676	1.0069	0.928317	0.969101	FALSE	Wsb1	WD repeat and SOCS box-containing 1 [Source:MGI Symbol;Acc:MGI:1926139]
ENSMUST00000187531	ENSMUSG00000037572	4.37445	5.57857	-1.27526	0.523372	0.756008	FALSE	Wdhd1	WD repeat and HMG-box DNA binding protein 1 [Source:MGI Symbol;Acc:MGI:2443514]
ENSMUST00000111792	ENSMUSG00000037572	0.864187	1.7086	-1.97711	0.598314	0.802504	FALSE	Wdhd1	WD repeat and HMG-box DNA binding protein 1 [Source:MGI Symbol;Acc:MGI:2443514]
ENSMUST00000111790	ENSMUSG00000037572	1.51476	2.33873	-1.54396	0.638162	0.825169	FALSE	Wdhd1	WD repeat and HMG-box DNA binding protein 1 [Source:MGI Symbol;Acc:MGI:2443514]
TCONS_00021386	ENSMUSG00000043940	4.25108	2.5846	1.64477	0.116552	0.411794	FALSE	Wdfy3	WD repeat and FYVE domain containing 3 [Source:MGI Symbol;Acc:MGI:1096875]
TCONS_00001294	ENSMUSG00000073643	6.44843	0.189365	34.0529	0.517183	0.752047	FALSE	Wdfy1	WD repeat and FYVE domain containing 1 [Source:MGI Symbol;Acc:MGI:1916618]
TCONS_00001292	ENSMUSG00000073643	2.79486	5.30956	-1.89976	0.731958	0.879268	FALSE	Wdfy1	WD repeat and FYVE domain containing 1 [Source:MGI Symbol;Acc:MGI:1916618]
ENSMUST00000223551	ENSMUSG00000051721	1.14592	1.51315	-1.32047	0.481361	0.747207	FALSE	Wdcp	WD repeat and coiled coil containing [Source:MGI Symbol;Acc:MGI:3040699]
ENSMUST00000043305	ENSMUSG00000037622	12.287	9.25932	1.32698	0.0619193	0.292828	FALSE	Wdtc1	WD and tetratricopeptide repeats 1 [Source:MGI Symbol;Acc:MGI:2685541]
TCONS_00009587	ENSMUSG00000022350	4.57856	2.7028	1.69401	0.00368979	0.0747069	TRUE	Washc5	WASH complex subunit 5 [Source:MGI Symbol;Acc:MGI:2146110]
ENSMUST00000022976	ENSMUSG00000022350	48.2706	37.5386	1.28589	0.0342602	0.209504	FALSE	Washc5	WASH complex subunit 5 [Source:MGI Symbol;Acc:MGI:2146110]
ENSMUST00000038388	ENSMUSG00000034560	21.5477	10.4677	2.0585	0.129831	0.435472	FALSE	Washc4	WASH complex subunit 4 [Source:MGI Symbol;Acc:MGI:2441787]
ENSMUST00000217842	ENSMUSG00000034560	2.4576	1.31477	1.86923	0.40355	0.700378	FALSE	Washc4	WASH complex subunit 4 [Source:MGI Symbol;Acc:MGI:2441787]
ENSMUST00000020248	ENSMUSG00000020056	8.27581	6.33521	1.30632	0.0991605	0.374838	FALSE	Washc3	WASH complex subunit 3 [Source:MGI Symbol;Acc:MGI:1914532]
ENSMUST00000182183	ENSMUSG00000020056	3.94097	3.97831	-1.00948	0.947067	0.97837	FALSE	Washc3	WASH complex subunit 3 [Source:MGI Symbol;Acc:MGI:1914532]
ENSMUST00000203802	ENSMUSG00000024104	32.6178	23.5767	1.38347	0.00792799	0.102432	FALSE	Washc2	WASH complex subunit 2` [Source:MGI Symbol;Acc:MGI:106463]
TCONS_00022547	ENSMUSG00000024104	9.40384	6.23502	1.50823	0.0338152	0.208345	FALSE	Washc2	WASH complex subunit 2` [Source:MGI Symbol;Acc:MGI:106463]
ENSMUST00000203980	ENSMUSG00000024104	3.08596	3.9051	-1.26544	0.715706	0.871418	FALSE	Washc2	WASH complex subunit 2` [Source:MGI Symbol;Acc:MGI:106463]
ENSMUST00000072383	ENSMUSG00000024101	0.693258	3.33754	-4.81428	0.256058	0.589707	FALSE	Washc1	WASH complex subunit 1 [Source:MGI Symbol;Acc:MGI:1916017]
TCONS_00011640	ENSMUSG00000024101	5.39049	2.08402	2.58658	0.322556	0.631593	FALSE	Washc1	WASH complex subunit 1 [Source:MGI Symbol;Acc:MGI:1916017]
ENSMUST00000116556	ENSMUSG00000024101	1.99805	2.21832	-1.11024	0.834455	0.926437	FALSE	Washc1	WASH complex subunit 1 [Source:MGI Symbol;Acc:MGI:1916017]
ENSMUST00000165460	ENSMUSG00000045795	5.46881	3.30054	1.65694	0.109766	0.398094	FALSE	Whamm	WAS protein homolog associated with actin, golgi membranes and microtubules [Source:MGI Symbol;Acc:MGI:2142282]
ENSMUST00000084241	ENSMUSG00000028868	25.0786	22.1432	1.13256	0.0884449	0.353908	FALSE	Wasf2	WAS protein family, member 2 [Source:MGI Symbol;Acc:MGI:1098641]
ENSMUST00000138831	ENSMUSG00000028868	2.12562	3.19149	-1.50144	0.257761	0.59075	FALSE	Wasf2	WAS protein family, member 2 [Source:MGI Symbol;Acc:MGI:1098641]
TCONS_00018794	ENSMUSG00000028868	2.87516	3.82494	-1.33034	0.652906	0.834513	FALSE	Wasf2	WAS protein family, member 2 [Source:MGI Symbol;Acc:MGI:1098641]
TCONS_00001957	ENSMUSG00000019831	5.81705	8.30041	-1.42691	0.391065	0.691483	FALSE	Wasf1	WAS protein family, member 1 [Source:MGI Symbol;Acc:MGI:1890563]
ENSMUST00000105509	ENSMUSG00000019831	2.99656	0.49912	6.00369	0.473045	0.740812	FALSE	Wasf1	WAS protein family, member 1 [Source:MGI Symbol;Acc:MGI:1890563]
ENSMUST00000090027	ENSMUSG00000041408	13.8484	10.6997	1.29428	0.320732	0.630281	FALSE	Wapl	WAPL cohesin release factor [Source:MGI Symbol;Acc:MGI:2675859]
TCONS_00008019	ENSMUSG00000041408	0.496601	2.72389	-5.48507	0.466862	0.736973	FALSE	Wapl	WAPL cohesin release factor [Source:MGI Symbol;Acc:MGI:2675859]
ENSMUST00000048263	ENSMUSG00000041408	5.60007	5.31741	1.05316	0.708032	0.867173	FALSE	Wapl	WAPL cohesin release factor [Source:MGI Symbol;Acc:MGI:2675859]
ENSMUST00000028900	ENSMUSG00000027411	15.5812	12.7813	1.21906	0.0157708	0.1403	FALSE	Vps16	VSP16 CORVET/HOPS core subunit [Source:MGI Symbol;Acc:MGI:2136772]
ENSMUST00000130258	ENSMUSG00000027411	0.935824	1.56596	-1.67334	0.673979	0.846941	FALSE	Vps16	VSP16 CORVET/HOPS core subunit [Source:MGI Symbol;Acc:MGI:2136772]
ENSMUST00000025867	ENSMUSG00000024927	17.5782	14.9423	1.17641	0.249678	0.58462	FALSE	Rela	v-rel reticuloendotheliosis viral oncogene homolog A (avian) [Source:MGI Symbol;Acc:MGI:103290]
ENSMUST00000004565	ENSMUSG00000004451	35.8212	38.6354	-1.07856	0.0374227	0.220013	FALSE	Ralb	v-ral simian leukemia viral oncogene B [Source:MGI Symbol;Acc:MGI:1927244]
ENSMUST00000009003	ENSMUSG00000008859	16.92	11.9381	1.4173	0.000178814	0.0380874	FALSE	Rala	v-ral simian leukemia viral oncogene A (ras related) [Source:MGI Symbol;Acc:MGI:1927243]
ENSMUST00000112949	ENSMUSG00000000441	0.377496	4.9823	-13.1983	0.0188608	0.154456	TRUE	Raf1	v-raf-leukemia viral oncogene 1 [Source:MGI Symbol;Acc:MGI:97847]
ENSMUST00000000451	ENSMUSG00000000441	32.2525	28.2948	1.13987	0.497625	0.747692	FALSE	Raf1	v-raf-leukemia viral oncogene 1 [Source:MGI Symbol;Acc:MGI:97847]
ENSMUST00000130528	ENSMUSG00000000441	4.00507	4.87455	-1.2171	0.790459	0.908522	FALSE	Raf1	v-raf-leukemia viral oncogene 1 [Source:MGI Symbol;Acc:MGI:97847]
ENSMUST00000127503	ENSMUSG00000000441	4.31736	3.44348	1.25378	0.830642	0.925299	FALSE	Raf1	v-raf-leukemia viral oncogene 1 [Source:MGI Symbol;Acc:MGI:97847]
TCONS_00027222	ENSMUSG00000001062	5.44471	3.75499	1.44999	0.194373	0.533184	FALSE	Vps9d1	VPS9 domain containing 1 [Source:MGI Symbol;Acc:MGI:1914143]
ENSMUST00000117598	ENSMUSG00000033653	11.6909	9.00328	1.29852	0.0208843	0.16315	FALSE	Vps8	VPS8 CORVET complex subunit [Source:MGI Symbol;Acc:MGI:2146407]
TCONS_00010236	ENSMUSG00000033653	3.33621	6.56673	-1.96832	0.0399953	0.228873	FALSE	Vps8	VPS8 CORVET complex subunit [Source:MGI Symbol;Acc:MGI:2146407]
ENSMUST00000096191	ENSMUSG00000033653	0.906857	0.022231	40.7925	0.439493	0.718144	FALSE	Vps8	VPS8 CORVET complex subunit [Source:MGI Symbol;Acc:MGI:2146407]
TCONS_00003401	ENSMUSG00000020128	6.57146	7.31588	-1.11328	0.783317	0.905048	FALSE	Vps54	VPS54 GARP complex subunit [Source:MGI Symbol;Acc:MGI:2178798]
ENSMUST00000169734	ENSMUSG00000017288	1.53142	8.0625	-5.26473	0.180102	0.512921	FALSE	Vps53	VPS53 GARP complex subunit [Source:MGI Symbol;Acc:MGI:1915549]
ENSMUST00000170143	ENSMUSG00000017288	0.507698	1.90047	-3.74331	0.194375	0.533184	FALSE	Vps53	VPS53 GARP complex subunit [Source:MGI Symbol;Acc:MGI:1915549]
ENSMUST00000056601	ENSMUSG00000017288	17.4538	12.2982	1.41922	0.257736	0.59075	FALSE	Vps53	VPS53 GARP complex subunit [Source:MGI Symbol;Acc:MGI:1915549]
ENSMUST00000129256	ENSMUSG00000017288	4.75125	4.55611	1.04283	0.837162	0.926944	FALSE	Vps53	VPS53 GARP complex subunit [Source:MGI Symbol;Acc:MGI:1915549]
TCONS_00011355	ENSMUSG00000024319	3.87922	2.87215	1.35063	0.314454	0.624355	FALSE	Vps52	VPS52 GARP complex subunit [Source:MGI Symbol;Acc:MGI:1330304]
ENSMUST00000025178	ENSMUSG00000024319	11.5948	9.53512	1.21601	0.744253	0.885373	FALSE	Vps52	VPS52 GARP complex subunit [Source:MGI Symbol;Acc:MGI:1330304]
ENSMUST00000164052	ENSMUSG00000001376	2.98895	0.721986	4.13989	0.184677	0.519686	FALSE	Vps50	VPS50 EARP/GARPII complex subunit [Source:MGI Symbol;Acc:MGI:1920538]
ENSMUST00000184780	ENSMUSG00000001376	4.44229	3.2551	1.36472	0.396549	0.694793	FALSE	Vps50	VPS50 EARP/GARPII complex subunit [Source:MGI Symbol;Acc:MGI:1920538]
ENSMUST00000184461	ENSMUSG00000001376	6.34085	5.39583	1.17514	0.477873	0.74442	FALSE	Vps50	VPS50 EARP/GARPII complex subunit [Source:MGI Symbol;Acc:MGI:1920538]
ENSMUST00000001412	ENSMUSG00000001376	4.26056	5.94348	-1.395	0.586074	0.795183	FALSE	Vps50	VPS50 EARP/GARPII complex subunit [Source:MGI Symbol;Acc:MGI:1920538]
ENSMUST00000072961	ENSMUSG00000041236	27.0255	18.7278	1.44306	0.00566744	0.0877604	FALSE	Vps41	VPS41 HOPS complex subunit [Source:MGI Symbol;Acc:MGI:1929215]
ENSMUST00000129857	ENSMUSG00000027291	0.661659	3.64419	-5.50766	0.079776	0.33494	FALSE	Vps39	VPS39 HOPS complex subunit [Source:MGI Symbol;Acc:MGI:2443189]
ENSMUST00000028752	ENSMUSG00000027291	14.6098	8.02185	1.82125	0.116193	0.411525	FALSE	Vps39	VPS39 HOPS complex subunit [Source:MGI Symbol;Acc:MGI:2443189]
ENSMUST00000102501	ENSMUSG00000027291	2.74021	2.73021	1.00366	0.451817	0.726792	FALSE	Vps39	VPS39 HOPS complex subunit [Source:MGI Symbol;Acc:MGI:2443189]
ENSMUST00000034131	ENSMUSG00000031696	71.1717	63.241	1.1254	0.364038	0.66819	FALSE	Vps35	VPS35 retromer complex component [Source:MGI Symbol;Acc:MGI:1890467]
ENSMUST00000059390	ENSMUSG00000030982	19.8881	12.86	1.54651	0.0235174	0.172595	TRUE	9030624J02Rik	VPS35 endosomal protein sorting factor like [Source:MGI Symbol;Acc:MGI:1918767]
ENSMUST00000021426	ENSMUSG00000021038	3.54175	0.440007	8.0493	0.165055	0.491921	FALSE	Vipas39	VPS33B interacting protein, apical-basolateral polarity regulator, spe-39 homolog [Source:MGI Symbol;Acc:MGI:2144805]
TCONS_00006589	ENSMUSG00000021038	6.55088	11.3756	-1.7365	0.381979	0.68375	FALSE	Vipas39	VPS33B interacting protein, apical-basolateral polarity regulator, spe-39 homolog [Source:MGI Symbol;Acc:MGI:2144805]
ENSMUST00000072744	ENSMUSG00000021038	3.65188	5.61812	-1.53842	0.769637	0.897746	FALSE	Vipas39	VPS33B interacting protein, apical-basolateral polarity regulator, spe-39 homolog [Source:MGI Symbol;Acc:MGI:2144805]
ENSMUST00000031388	ENSMUSG00000029434	22.3201	19.3137	1.15566	0.0191306	0.15543	FALSE	Vps33a	VPS33A CORVET/HOPS core subunit [Source:MGI Symbol;Acc:MGI:1924823]
ENSMUST00000155671	ENSMUSG00000029462	4.30306	1.17089	3.67502	0.0176589	0.148966	TRUE	Vps29	VPS29 retromer complex component [Source:MGI Symbol;Acc:MGI:1928344]
ENSMUST00000111729	ENSMUSG00000029462	17.1662	22.0147	-1.28245	0.407513	0.702773	FALSE	Vps29	VPS29 retromer complex component [Source:MGI Symbol;Acc:MGI:1928344]
ENSMUST00000118830	ENSMUSG00000029462	2.71004	0.607557	4.46055	0.763052	0.894333	FALSE	Vps29	VPS29 retromer complex component [Source:MGI Symbol;Acc:MGI:1928344]
ENSMUST00000217868	ENSMUSG00000020078	2.4042	0.403667	5.95591	0.00256118	0.0629369	TRUE	Vps26a	VPS26 retromer complex component A [Source:MGI Symbol;Acc:MGI:1353654]
ENSMUST00000105447	ENSMUSG00000020078	38.0819	39.0917	-1.02652	0.0295546	0.193804	FALSE	Vps26a	VPS26 retromer complex component A [Source:MGI Symbol;Acc:MGI:1353654]
ENSMUST00000023615	ENSMUSG00000022898	39.4379	38.7867	1.01679	0.51824	0.752642	FALSE	Dscr3	VPS26 endosomal protein sorting factor C [Source:MGI Symbol;Acc:MGI:1206040]
ENSMUST00000037280	ENSMUSG00000034216	14.924	13.0844	1.1406	0.0172761	0.146896	FALSE	Vps18	VPS18 CORVET/HOPS core subunit [Source:MGI Symbol;Acc:MGI:2443626]
TCONS_00028394	ENSMUSG00000032127	11.1748	9.11844	1.22551	0.00782908	0.101551	FALSE	Vps11	VPS11, CORVET/HOPS core subunit [Source:MGI Symbol;Acc:MGI:1918982]
ENSMUST00000040990	ENSMUSG00000058997	10.7407	7.3396	1.46339	0.0528647	0.268265	FALSE	Vwa8	von Willebrand factor A domain containing 8 [Source:MGI Symbol;Acc:MGI:1919008]
ENSMUST00000118144	ENSMUSG00000023186	12.3284	1.84281	6.68998	0.0586578	0.283431	FALSE	Vwa5a	von Willebrand factor A domain containing 5A [Source:MGI Symbol;Acc:MGI:1915026]
ENSMUST00000001544	ENSMUSG00000023186	2.98636	2.79996	1.06657	0.741605	0.884028	FALSE	Vwa5a	von Willebrand factor A domain containing 5A [Source:MGI Symbol;Acc:MGI:1915026]
ENSMUST00000035673	ENSMUSG00000033933	14.5651	14.0193	1.03893	0.84307	0.92849	FALSE	Vhl	von Hippel-Lindau tumor suppressor [Source:MGI Symbol;Acc:MGI:103223]
ENSMUST00000033540	ENSMUSG00000031197	45.9938	55.8698	-1.21473	0.236232	0.573349	FALSE	Vbp1	von Hippel-Lindau binding protein 1 [Source:MGI Symbol;Acc:MGI:1333804]
ENSMUST00000099736	ENSMUSG00000075053	19.5395	22.4457	-1.14874	0.0854245	0.346942	FALSE	Vdac3-ps1	voltage-dependent anion channel 3, pseudogene 1 [Source:MGI Symbol;Acc:MGI:1270159]
ENSMUST00000009036	ENSMUSG00000008892	83.1606	95.9883	-1.15425	0.100049	0.376698	FALSE	Vdac3	voltage-dependent anion channel 3 [Source:MGI Symbol;Acc:MGI:106922]
ENSMUST00000022293	ENSMUSG00000021771	63.7527	74.7662	-1.17275	0.0151155	0.137718	FALSE	Vdac2	voltage-dependent anion channel 2 [Source:MGI Symbol;Acc:MGI:106915]
ENSMUST00000153320	ENSMUSG00000021771	1.46206	0.938423	1.558	0.581046	0.792066	FALSE	Vdac2	voltage-dependent anion channel 2 [Source:MGI Symbol;Acc:MGI:106915]
ENSMUST00000172727	ENSMUSG00000021771	0.963263	5.44607	-5.65378	0.74676	0.886325	FALSE	Vdac2	voltage-dependent anion channel 2 [Source:MGI Symbol;Acc:MGI:106915]
TCONS_00003556	ENSMUSG00000020402	66.2913	133.938	-2.02044	0.260339	0.593778	FALSE	Vdac1	voltage-dependent anion channel 1 [Source:MGI Symbol;Acc:MGI:106919]
ENSMUST00000153339	ENSMUSG00000020402	4.00139	5.30142	-1.32489	0.496941	0.747692	FALSE	Vdac1	voltage-dependent anion channel 1 [Source:MGI Symbol;Acc:MGI:106919]
ENSMUST00000125694	ENSMUSG00000020402	10.6719	21.631	-2.02692	0.503536	0.747692	FALSE	Vdac1	voltage-dependent anion channel 1 [Source:MGI Symbol;Acc:MGI:106919]
ENSMUST00000020673	ENSMUSG00000020402	20.7219	27.6104	-1.33242	0.900392	0.955266	FALSE	Vdac1	voltage-dependent anion channel 1 [Source:MGI Symbol;Acc:MGI:106919]
ENSMUST00000102758	ENSMUSG00000020402	69.1225	22.9579	3.01084	0.948101	0.978762	FALSE	Vdac1	voltage-dependent anion channel 1 [Source:MGI Symbol;Acc:MGI:106919]
ENSMUST00000018287	ENSMUSG00000018143	10.4812	8.67714	1.20791	0.00493639	0.0829654	FALSE	Mafk	v-maf musculoaponeurotic fibrosarcoma oncogene family, protein K (avian) [Source:MGI Symbol;Acc:MGI:99951]
ENSMUST00000058162	ENSMUSG00000051510	30.8328	24.1649	1.27593	0.0341401	0.209204	FALSE	Mafg	v-maf musculoaponeurotic fibrosarcoma oncogene family, protein G (avian) [Source:MGI Symbol;Acc:MGI:96911]
ENSMUST00000106180	ENSMUSG00000051510	2.54268	0.898984	2.8284	0.11953	0.417574	FALSE	Mafg	v-maf musculoaponeurotic fibrosarcoma oncogene family, protein G (avian) [Source:MGI Symbol;Acc:MGI:96911]
ENSMUST00000114576	ENSMUSG00000073131	10.176	14.1526	-1.39078	0.00554236	0.0867037	FALSE	Vma21	VMA21 vacuolar H+-ATPase homolog (S. cerevisiae) [Source:MGI Symbol;Acc:MGI:1914298]
ENSMUST00000114575	ENSMUSG00000073131	1.90637	0.104527	18.2381	0.00634924	0.0922704	TRUE	Vma21	VMA21 vacuolar H+-ATPase homolog (S. cerevisiae) [Source:MGI Symbol;Acc:MGI:1914298]
ENSMUST00000201855	ENSMUSG00000066735	2.63562	2.284	1.15395	0.332317	0.641522	FALSE	Vkorc1l1	vitamin K epoxide reductase complex, subunit 1-like 1 [Source:MGI Symbol;Acc:MGI:1916818]
ENSMUST00000202486	ENSMUSG00000066735	0.14426	1.03932	-7.20448	0.36168	0.666458	FALSE	Vkorc1l1	vitamin K epoxide reductase complex, subunit 1-like 1 [Source:MGI Symbol;Acc:MGI:1916818]
ENSMUST00000051758	ENSMUSG00000066735	5.442	3.56948	1.52459	0.600957	0.803664	FALSE	Vkorc1l1	vitamin K epoxide reductase complex, subunit 1-like 1 [Source:MGI Symbol;Acc:MGI:1916818]
ENSMUST00000033074	ENSMUSG00000096145	11.2689	13.3252	-1.18247	0.45089	0.726149	FALSE	Vkorc1	vitamin K epoxide reductase complex, subunit 1 [Source:MGI Symbol;Acc:MGI:106442]
ENSMUST00000059914	ENSMUSG00000040720	19.2638	16.7337	1.1512	0.0124119	0.125524	FALSE	Virma	vir like m6A methyltransferase associated [Source:MGI Symbol;Acc:MGI:1913435]
ENSMUST00000022369	ENSMUSG00000021823	11.2336	16.483	-1.4673	0.00188072	0.055893	FALSE	Vcl	vinculin [Source:MGI Symbol;Acc:MGI:98927]
ENSMUST00000148248	ENSMUSG00000026728	79.8007	53.5644	1.48981	0.0931659	0.363049	FALSE	Vim	vimentin [Source:MGI Symbol;Acc:MGI:98932]
ENSMUST00000191615	ENSMUSG00000026728	12.5083	8.1286	1.53881	0.102884	0.382444	FALSE	Vim	vimentin [Source:MGI Symbol;Acc:MGI:98932]
ENSMUST00000155605	ENSMUSG00000026728	6.26474	4.07276	1.53821	0.103455	0.383618	FALSE	Vim	vimentin [Source:MGI Symbol;Acc:MGI:98932]
ENSMUST00000028062	ENSMUSG00000026728	242.907	197.135	1.23219	0.383981	0.685195	FALSE	Vim	vimentin [Source:MGI Symbol;Acc:MGI:98932]
TCONS_00014257	ENSMUSG00000026728	89.8705	15.8948	5.65407	0.587266	0.796074	FALSE	Vim	vimentin [Source:MGI Symbol;Acc:MGI:98932]
ENSMUST00000141365	ENSMUSG00000026728	18.1138	11.7456	1.54217	0.936372	0.973149	FALSE	Vim	vimentin [Source:MGI Symbol;Acc:MGI:98932]
ENSMUST00000141185	ENSMUSG00000038775	0.0276547	0.9467	-34.2329	0.23509	0.572571	FALSE	Vill	villin-like [Source:MGI Symbol;Acc:MGI:1201781]
TCONS_00028102	ENSMUSG00000038775	1.08705	2.30142	-2.11713	0.429904	0.714068	FALSE	Vill	villin-like [Source:MGI Symbol;Acc:MGI:1201781]
TCONS_00028100	ENSMUSG00000038775	4.73212	3.36829	1.4049	0.655348	0.835943	FALSE	Vill	villin-like [Source:MGI Symbol;Acc:MGI:1201781]
ENSMUST00000136561	ENSMUSG00000038775	2.5653	3.33372	-1.29954	0.796336	0.910586	FALSE	Vill	villin-like [Source:MGI Symbol;Acc:MGI:1201781]
TCONS_00028099	ENSMUSG00000038775	21.0028	20.5677	1.02115	0.977504	0.989844	FALSE	Vill	villin-like [Source:MGI Symbol;Acc:MGI:1201781]
ENSMUST00000047711	ENSMUSG00000036099	2.74787	2.62429	1.04709	0.831934	0.925846	FALSE	Vezt	vezatin, adherens junctions transmembrane protein [Source:MGI Symbol;Acc:MGI:2143698]
TCONS_00023371	ENSMUSG00000030315	5.54138	6.66892	-1.20348	0.0152732	0.138599	FALSE	Vgll4	vestigial like family member 4 [Source:MGI Symbol;Acc:MGI:2652840]
ENSMUST00000152710	ENSMUSG00000030315	20.4911	34.1437	-1.66627	0.0549817	0.274078	FALSE	Vgll4	vestigial like family member 4 [Source:MGI Symbol;Acc:MGI:2652840]
ENSMUST00000139640	ENSMUSG00000030315	2.05099	4.3857	-2.13833	0.075516	0.325695	FALSE	Vgll4	vestigial like family member 4 [Source:MGI Symbol;Acc:MGI:2652840]
ENSMUST00000147639	ENSMUSG00000030315	1.54676	3.4353	-2.22097	0.0925498	0.361243	FALSE	Vgll4	vestigial like family member 4 [Source:MGI Symbol;Acc:MGI:2652840]
ENSMUST00000032459	ENSMUSG00000030315	0.0374273	9.0755	-242.483	0.488483	0.747692	FALSE	Vgll4	vestigial like family member 4 [Source:MGI Symbol;Acc:MGI:2652840]
ENSMUST00000227997	ENSMUSG00000091243	4.03721	4.94544	-1.22497	0.218824	0.555217	FALSE	Vgll3	vestigial like family member 3 [Source:MGI Symbol;Acc:MGI:1920819]
TCONS_00010440	ENSMUSG00000091243	9.27175	12.6647	-1.36594	0.339531	0.646466	FALSE	Vgll3	vestigial like family member 3 [Source:MGI Symbol;Acc:MGI:1920819]
ENSMUST00000168064	ENSMUSG00000091243	12.6295	14.2191	-1.12587	0.729219	0.878415	FALSE	Vgll3	vestigial like family member 3 [Source:MGI Symbol;Acc:MGI:1920819]
ENSMUST00000024897	ENSMUSG00000024091	90.7249	97.9375	-1.0795	0.15756	0.48085	FALSE	Vapa	vesicle-associated membrane protein, associated protein A [Source:MGI Symbol;Acc:MGI:1353561]
TCONS_00023144	ENSMUSG00000050732	54.9258	27.0966	2.02704	0.0414823	0.233839	FALSE	Vamp8	vesicle-associated membrane protein 8 [Source:MGI Symbol;Acc:MGI:1336882]
ENSMUST00000142613	ENSMUSG00000050732	3.8375	2.83505	1.35359	0.068017	0.308098	FALSE	Vamp8	vesicle-associated membrane protein 8 [Source:MGI Symbol;Acc:MGI:1336882]
ENSMUST00000059983	ENSMUSG00000050732	0.915403	5.49704	-6.00505	0.284458	0.604301	FALSE	Vamp8	vesicle-associated membrane protein 8 [Source:MGI Symbol;Acc:MGI:1336882]
ENSMUST00000074231	ENSMUSG00000073002	7.7408	2.92977	2.64212	0.074739	0.323908	FALSE	Vamp5	vesicle-associated membrane protein 5 [Source:MGI Symbol;Acc:MGI:1858622]
ENSMUST00000101285	ENSMUSG00000073002	0.0889177	1.94898	-21.919	0.273922	0.601435	FALSE	Vamp5	vesicle-associated membrane protein 5 [Source:MGI Symbol;Acc:MGI:1858622]
ENSMUST00000132158	ENSMUSG00000026696	2.67042	1.55754	1.71451	0.520615	0.754403	FALSE	Vamp4	vesicle-associated membrane protein 4 [Source:MGI Symbol;Acc:MGI:1858730]
ENSMUST00000135241	ENSMUSG00000026696	11.7116	11.4533	1.02255	0.674163	0.847019	FALSE	Vamp4	vesicle-associated membrane protein 4 [Source:MGI Symbol;Acc:MGI:1858730]
ENSMUST00000050010	ENSMUSG00000026696	1.09335	0.672497	1.62581	0.984589	0.993127	FALSE	Vamp4	vesicle-associated membrane protein 4 [Source:MGI Symbol;Acc:MGI:1858730]
ENSMUST00000030797	ENSMUSG00000028955	34.2504	23.5616	1.45366	0.0359338	0.214772	FALSE	Vamp3	vesicle-associated membrane protein 3 [Source:MGI Symbol;Acc:MGI:1321389]
ENSMUST00000021273	ENSMUSG00000020894	10.8973	6.88016	1.58387	0.00688037	0.0949336	TRUE	Vamp2	vesicle-associated membrane protein 2 [Source:MGI Symbol;Acc:MGI:1313277]
ENSMUST00000162789	ENSMUSG00000021124	5.72108	4.98329	1.14805	0.887373	0.950232	FALSE	Vti1b	vesicle transport through interaction with t-SNAREs 1B [Source:MGI Symbol;Acc:MGI:1855688]
ENSMUST00000055262	ENSMUSG00000021124	24.811	21.624	1.14739	0.990242	0.994693	FALSE	Vti1b	vesicle transport through interaction with t-SNAREs 1B [Source:MGI Symbol;Acc:MGI:1855688]
ENSMUST00000095950	ENSMUSG00000024983	10.314	8.13249	1.26824	0.0935309	0.363648	FALSE	Vti1a	vesicle transport through interaction with t-SNAREs 1A [Source:MGI Symbol;Acc:MGI:1855699]
ENSMUST00000040430	ENSMUSG00000034993	427.466	217.044	1.96949	0.000102359	0.0331924	TRUE	Vat1	vesicle amine transport 1 [Source:MGI Symbol;Acc:MGI:1349450]
ENSMUST00000154132	ENSMUSG00000019868	17.3761	14.2739	1.21733	0.262586	0.595291	FALSE	Vta1	vesicle (multivesicular body) trafficking 1 [Source:MGI Symbol;Acc:MGI:1913451]
ENSMUST00000149485	ENSMUSG00000019868	0.799239	2.50537	-3.13469	0.385178	0.685986	FALSE	Vta1	vesicle (multivesicular body) trafficking 1 [Source:MGI Symbol;Acc:MGI:1913451]
ENSMUST00000006293	ENSMUSG00000006134	20.1201	18.2786	1.10074	0.222107	0.558067	FALSE	Crkl	v-crk avian sarcoma virus CT10 oncogene homolog-like [Source:MGI Symbol;Acc:MGI:104686]
ENSMUST00000017920	ENSMUSG00000017776	21.9608	26.8539	-1.22281	0.262797	0.595407	FALSE	Crk	v-crk avian sarcoma virus CT10 oncogene homolog [Source:MGI Symbol;Acc:MGI:88508]
ENSMUST00000108425	ENSMUSG00000017776	11.6886	14.8721	-1.27237	0.299871	0.611877	FALSE	Crk	v-crk avian sarcoma virus CT10 oncogene homolog [Source:MGI Symbol;Acc:MGI:88508]
TCONS_00024791	ENSMUSG00000030403	0.00966833	1.69106	-174.907	0.00400329	0.0763539	TRUE	Vasp	vasodilator-stimulated phosphoprotein [Source:MGI Symbol;Acc:MGI:109268]
ENSMUST00000032561	ENSMUSG00000030403	27.8054	31.6923	-1.13979	0.0611266	0.290537	FALSE	Vasp	vasodilator-stimulated phosphoprotein [Source:MGI Symbol;Acc:MGI:109268]
TCONS_00004035	ENSMUSG00000018377	7.41459	4.78725	1.54882	0.378254	0.680298	FALSE	Vezf1	vascular endothelial zinc finger 1 [Source:MGI Symbol;Acc:MGI:1313291]
TCONS_00013850	ENSMUSG00000024962	1.66873	2.84114	-1.70258	0.045448	0.246918	FALSE	Vegfb	vascular endothelial growth factor B [Source:MGI Symbol;Acc:MGI:106199]
ENSMUST00000130048	ENSMUSG00000024962	27.9249	18.5661	1.50408	0.168362	0.49707	FALSE	Vegfb	vascular endothelial growth factor B [Source:MGI Symbol;Acc:MGI:106199]
ENSMUST00000024747	ENSMUSG00000023951	16.4388	11.487	1.43107	0.0551461	0.27437	FALSE	Vegfa	vascular endothelial growth factor A [Source:MGI Symbol;Acc:MGI:103178]
ENSMUST00000071648	ENSMUSG00000023951	5.34017	5.40473	-1.01209	0.980166	0.99083	FALSE	Vegfa	vascular endothelial growth factor A [Source:MGI Symbol;Acc:MGI:103178]
ENSMUST00000027837	ENSMUSG00000026556	3.58976	3.9602	-1.10319	0.0843731	0.344749	FALSE	Vangl2	VANGL planar cell polarity 2 [Source:MGI Symbol;Acc:MGI:2135272]
ENSMUST00000138714	ENSMUSG00000026556	0.866745	1.55142	-1.78994	0.64232	0.828399	FALSE	Vangl2	VANGL planar cell polarity 2 [Source:MGI Symbol;Acc:MGI:2135272]
ENSMUST00000171536	ENSMUSG00000038838	5.87724	6.73589	-1.1461	0.876065	0.944975	FALSE	Vars2	valyl-tRNA synthetase 2, mitochondrial [Source:MGI Symbol;Acc:MGI:1916165]
ENSMUST00000173584	ENSMUSG00000007029	19.3811	34.664	-1.78854	0.02569	0.18105	TRUE	Vars	valyl-tRNA synthetase [Source:MGI Symbol;Acc:MGI:90675]
ENSMUST00000087315	ENSMUSG00000007029	23.5695	29.0285	-1.23161	0.479312	0.745496	FALSE	Vars	valyl-tRNA synthetase [Source:MGI Symbol;Acc:MGI:90675]
ENSMUST00000120233	ENSMUSG00000083327	58.5032	45.1132	1.29681	0.0429379	0.238211	FALSE	Vcp-rs	valosin containing protein, related sequence [Source:MGI Symbol;Acc:MGI:894298]
ENSMUST00000058639	ENSMUSG00000049882	5.64023	8.99685	-1.59512	0.0519642	0.265938	FALSE	Vcpkmt	valosin containing protein lysine (K) methyltransferase [Source:MGI Symbol;Acc:MGI:2684917]
ENSMUST00000030164	ENSMUSG00000028452	219.37	188.216	1.16552	0.0475908	0.253366	FALSE	Vcp	valosin containing protein [Source:MGI Symbol;Acc:MGI:99919]
ENSMUST00000057438	ENSMUSG00000045210	12.6133	10.3532	1.2183	0.013771	0.131899	FALSE	Vcpip1	valosin containing protein (p97)/p47 complex interacting protein 1 [Source:MGI Symbol;Acc:MGI:1917925]
ENSMUST00000018315	ENSMUSG00000018171	0.0404123	2.92024	-72.261	0.230648	0.569357	FALSE	Vmp1	vacuole membrane protein 1 [Source:MGI Symbol;Acc:MGI:1923159]
TCONS_00005188	ENSMUSG00000018171	0.279919	1.33064	-4.75365	0.434571	0.715475	FALSE	Vmp1	vacuole membrane protein 1 [Source:MGI Symbol;Acc:MGI:1923159]
TCONS_00005186	ENSMUSG00000018171	1.89	1.7717	1.06678	0.555253	0.776051	FALSE	Vmp1	vacuole membrane protein 1 [Source:MGI Symbol;Acc:MGI:1923159]
TCONS_00005187	ENSMUSG00000018171	4.27132	5.37049	-1.25734	0.86807	0.940955	FALSE	Vmp1	vacuole membrane protein 1 [Source:MGI Symbol;Acc:MGI:1923159]
ENSMUST00000145846	ENSMUSG00000018171	4.46363	6.64613	-1.48895	0.888424	0.950769	FALSE	Vmp1	vacuole membrane protein 1 [Source:MGI Symbol;Acc:MGI:1923159]
TCONS_00005185	ENSMUSG00000018171	8.01707	6.69268	1.19789	0.92323	0.96672	FALSE	Vmp1	vacuole membrane protein 1 [Source:MGI Symbol;Acc:MGI:1923159]
ENSMUST00000009102	ENSMUSG00000008958	9.39123	12.3054	-1.31031	0.414038	0.708689	FALSE	Vps72	vacuolar protein sorting 72 [Source:MGI Symbol;Acc:MGI:1202305]
ENSMUST00000094646	ENSMUSG00000009907	15.4351	11.562	1.33498	0.120232	0.419141	FALSE	Vps4b	vacuolar protein sorting 4B [Source:MGI Symbol;Acc:MGI:1100499]
ENSMUST00000034388	ENSMUSG00000031913	17.4388	12.7088	1.37218	0.00253563	0.0625676	FALSE	Vps4a	vacuolar protein sorting 4A [Source:MGI Symbol;Acc:MGI:1890520]
ENSMUST00000087951	ENSMUSG00000048832	7.45742	5.00615	1.48965	0.125847	0.428837	FALSE	Vps37c	vacuolar protein sorting 37C [Source:MGI Symbol;Acc:MGI:2147661]
TCONS_00013427	ENSMUSG00000048832	2.84787	1.90545	1.49459	0.288282	0.604301	FALSE	Vps37c	vacuolar protein sorting 37C [Source:MGI Symbol;Acc:MGI:2147661]
ENSMUST00000040967	ENSMUSG00000066278	8.36293	10.2407	-1.22454	0.0116529	0.121752	FALSE	Vps37b	vacuolar protein sorting 37B [Source:MGI Symbol;Acc:MGI:1916724]
ENSMUST00000150585	ENSMUSG00000030534	4.33478	2.00685	2.15998	0.221221	0.556858	FALSE	Vps33b	vacuolar protein sorting 33B [Source:MGI Symbol;Acc:MGI:2446237]
ENSMUST00000128254	ENSMUSG00000030534	3.02505	2.44343	1.23804	0.781615	0.904079	FALSE	Vps33b	vacuolar protein sorting 33B [Source:MGI Symbol;Acc:MGI:2446237]
ENSMUST00000078803	ENSMUSG00000115987	43.5791	32.9964	1.32072	0.111376	0.401382	FALSE	Vps28	vacuolar protein sorting 28 [Source:MGI Symbol;Acc:MGI:1914164]
ENSMUST00000229019	ENSMUSG00000115987	7.66704	11.8597	-1.54684	0.325033	0.633816	FALSE	Vps28	vacuolar protein sorting 28 [Source:MGI Symbol;Acc:MGI:1914164]
ENSMUST00000229261	ENSMUSG00000115987	1.38072	2.03065	-1.47071	0.724111	0.875794	FALSE	Vps28	vacuolar protein sorting 28 [Source:MGI Symbol;Acc:MGI:1914164]
ENSMUST00000042477	ENSMUSG00000078656	0.321873	1.24394	-3.86468	0.268279	0.600785	FALSE	Vps25	vacuolar protein sorting 25 [Source:MGI Symbol;Acc:MGI:106354]
ENSMUST00000007533	ENSMUSG00000078656	3.94994	2.91408	1.35547	0.632186	0.822199	FALSE	Vps25	vacuolar protein sorting 25 [Source:MGI Symbol;Acc:MGI:106354]
TCONS_00019884	ENSMUSG00000020220	4.14492	2.07064	2.00175	0.0630993	0.296039	FALSE	Vps13d	vacuolar protein sorting 13D [Source:MGI Symbol;Acc:MGI:2448530]
TCONS_00027747	ENSMUSG00000035284	14.4124	10.917	1.32018	0.0531771	0.268897	FALSE	Vps13c	vacuolar protein sorting 13C [Source:MGI Symbol;Acc:MGI:2444207]
ENSMUST00000048646	ENSMUSG00000037646	9.0533	4.21723	2.14674	0.0640453	0.298421	FALSE	Vps13b	vacuolar protein sorting 13B [Source:MGI Symbol;Acc:MGI:1916380]
ENSMUST00000068156	ENSMUSG00000046230	9.59242	7.81879	1.22684	0.0977983	0.372377	FALSE	Vps13a	vacuolar protein sorting 13A [Source:MGI Symbol;Acc:MGI:2444304]
ENSMUST00000002275	ENSMUSG00000002205	16.4495	13.4139	1.2263	0.033882	0.20842	FALSE	Vrk3	vaccinia related kinase 3 [Source:MGI Symbol;Acc:MGI:2182465]
ENSMUST00000078362	ENSMUSG00000064090	1.0563	2.16549	-2.05006	0.481917	0.747664	FALSE	Vrk2	vaccinia related kinase 2 [Source:MGI Symbol;Acc:MGI:1917172]
ENSMUST00000109504	ENSMUSG00000064090	1.68147	1.09618	1.53394	0.862005	0.93881	FALSE	Vrk2	vaccinia related kinase 2 [Source:MGI Symbol;Acc:MGI:1917172]
ENSMUST00000085026	ENSMUSG00000021115	5.91422	10.3117	-1.74355	0.012454	0.125524	TRUE	Vrk1	vaccinia related kinase 1 [Source:MGI Symbol;Acc:MGI:1261847]
TCONS_00006163	ENSMUSG00000021115	3.48083	5.00549	-1.43802	0.700329	0.862672	FALSE	Vrk1	vaccinia related kinase 1 [Source:MGI Symbol;Acc:MGI:1261847]
ENSMUST00000212829	ENSMUSG00000010936	3.34211	0.563033	5.9359	0.136825	0.448349	FALSE	Vac14	Vac14 homolog (S. cerevisiae) [Source:MGI Symbol;Acc:MGI:2157980]
TCONS_00026369	ENSMUSG00000010936	7.19663	7.12214	1.01046	0.601023	0.803664	FALSE	Vac14	Vac14 homolog (S. cerevisiae) [Source:MGI Symbol;Acc:MGI:2157980]
ENSMUST00000034190	ENSMUSG00000010936	2.40844	6.80007	-2.82344	0.666957	0.842703	FALSE	Vac14	Vac14 homolog (S. cerevisiae) [Source:MGI Symbol;Acc:MGI:2157980]
TCONS_00000699	ENSMUSG00000026596	1.97445	3.8183	-1.93386	0.0745887	0.323596	FALSE	Abl2	v-abl Abelson murine leukemia viral oncogene 2 (arg, Abelson-related gene) [Source:MGI Symbol;Acc:MGI:87860]
ENSMUST00000208609	ENSMUSG00000035354	2.81167	10.5684	-3.75876	0.125419	0.428285	FALSE	Uvrag	UV radiation resistance associated gene [Source:MGI Symbol;Acc:MGI:1925860]
ENSMUST00000037968	ENSMUSG00000035354	9.62577	6.16149	1.56225	0.54582	0.769349	FALSE	Uvrag	UV radiation resistance associated gene [Source:MGI Symbol;Acc:MGI:1925860]
TCONS_00002569	ENSMUSG00000019820	7.18832	0.003935	1826.77	0.0793417	0.334051	FALSE	Utrn	utrophin [Source:MGI Symbol;Acc:MGI:104631]
ENSMUST00000076817	ENSMUSG00000019820	11.9394	18.3045	-1.53312	0.41836	0.711229	FALSE	Utrn	utrophin [Source:MGI Symbol;Acc:MGI:104631]
TCONS_00002570	ENSMUSG00000019820	8.53947	0.0276757	308.555	0.425785	0.714068	FALSE	Utrn	utrophin [Source:MGI Symbol;Acc:MGI:104631]
ENSMUST00000218635	ENSMUSG00000019820	1.88339	1.18025	1.59576	0.52684	0.758433	FALSE	Utrn	utrophin [Source:MGI Symbol;Acc:MGI:104631]
ENSMUST00000043152	ENSMUSG00000035575	20.201	23.4068	-1.15869	0.0156118	0.139788	FALSE	Utp6	UTP6 small subunit processome component [Source:MGI Symbol;Acc:MGI:2445193]
TCONS_00026333	ENSMUSG00000041438	1.68339	4.83202	-2.87041	0.0495555	0.259597	FALSE	Utp4	UTP4 small subunit processome component [Source:MGI Symbol;Acc:MGI:1096573]
TCONS_00026332	ENSMUSG00000041438	2.98445	1.81755	1.64202	0.703541	0.864681	FALSE	Utp4	UTP4 small subunit processome component [Source:MGI Symbol;Acc:MGI:1096573]
ENSMUST00000212718	ENSMUSG00000041438	2.03366	1.47936	1.37468	0.743459	0.88504	FALSE	Utp4	UTP4 small subunit processome component [Source:MGI Symbol;Acc:MGI:1096573]
TCONS_00026337	ENSMUSG00000041438	1.32408	2.53841	-1.91711	0.814568	0.917977	FALSE	Utp4	UTP4 small subunit processome component [Source:MGI Symbol;Acc:MGI:1096573]
TCONS_00026336	ENSMUSG00000041438	2.30824	4.20619	-1.82225	0.844025	0.929079	FALSE	Utp4	UTP4 small subunit processome component [Source:MGI Symbol;Acc:MGI:1096573]
ENSMUST00000090413	ENSMUSG00000070697	11.6032	13.2651	-1.14323	0.172331	0.502518	FALSE	Utp3	UTP3 small subunit processome component [Source:MGI Symbol;Acc:MGI:1919230]
ENSMUST00000004470	ENSMUSG00000004356	10.1242	13.2359	-1.30735	0.0471195	0.252025	FALSE	Utp20	UTP20 small subunit processome component [Source:MGI Symbol;Acc:MGI:1917933]
TCONS_00005225	ENSMUSG00000054079	4.07036	8.16781	-2.00665	0.270299	0.601435	FALSE	Utp18	UTP18 small subunit processome component [Source:MGI Symbol;Acc:MGI:1923402]
ENSMUST00000130797	ENSMUSG00000054079	1.58452	3.2835	-2.07224	0.347566	0.653113	FALSE	Utp18	UTP18 small subunit processome component [Source:MGI Symbol;Acc:MGI:1923402]
ENSMUST00000066888	ENSMUSG00000054079	11.0501	10.5573	1.04668	0.935988	0.972873	FALSE	Utp18	UTP18 small subunit processome component [Source:MGI Symbol;Acc:MGI:1923402]
ENSMUST00000040972	ENSMUSG00000041747	9.78325	12.1403	-1.24092	7.78e-05	0.0331924	FALSE	Utp15	UTP15 small subunit processome component [Source:MGI Symbol;Acc:MGI:2145443]
ENSMUST00000053760	ENSMUSG00000079470	7.29322	9.51	-1.30395	0.00341047	0.0717933	FALSE	Utp14b	UTP14B small subunit processome component [Source:MGI Symbol;Acc:MGI:2445092]
ENSMUST00000030738	ENSMUSG00000028907	7.49924	8.5594	-1.14137	0.0124372	0.125524	FALSE	Utp11	UTP11 small subunit processome component [Source:MGI Symbol;Acc:MGI:1914455]
ENSMUST00000114937	ENSMUSG00000039046	9.85529	8.33281	1.18271	0.421879	0.713294	FALSE	Usp6nl	USP6 N-terminal like [Source:MGI Symbol;Acc:MGI:2138893]
ENSMUST00000201380	ENSMUSG00000029407	12.878	6.30366	2.04294	0.168916	0.497522	FALSE	Uso1	USO1 vesicle docking factor [Source:MGI Symbol;Acc:MGI:1929095]
ENSMUST00000031355	ENSMUSG00000029407	21.9308	11.9268	1.83879	0.324156	0.633226	FALSE	Uso1	USO1 vesicle docking factor [Source:MGI Symbol;Acc:MGI:1929095]
ENSMUST00000202155	ENSMUSG00000029407	0.524275	2.65952	-5.07276	0.452125	0.727005	FALSE	Uso1	USO1 vesicle docking factor [Source:MGI Symbol;Acc:MGI:1929095]
ENSMUST00000201642	ENSMUSG00000029407	1.47231	6.5402	-4.44213	0.623184	0.817138	FALSE	Uso1	USO1 vesicle docking factor [Source:MGI Symbol;Acc:MGI:1929095]
ENSMUST00000030446	ENSMUSG00000028684	17.4644	15.704	1.1121	0.650819	0.833585	FALSE	Urod	uroporphyrinogen decarboxylase [Source:MGI Symbol;Acc:MGI:98916]
ENSMUST00000134598	ENSMUSG00000028684	1.42239	2.89113	-2.03258	0.883671	0.947863	FALSE	Urod	uroporphyrinogen decarboxylase [Source:MGI Symbol;Acc:MGI:98916]
ENSMUST00000053686	ENSMUSG00000026558	26.2119	31.2292	-1.19141	0.00174191	0.0549099	FALSE	Uck2	uridine-cytidine kinase 2 [Source:MGI Symbol;Acc:MGI:1931744]
ENSMUST00000057816	ENSMUSG00000089917	6.06432	3.5696	1.69888	0.09847	0.373594	FALSE	Uckl1	uridine-cytidine kinase 1-like 1 [Source:MGI Symbol;Acc:MGI:1915806]
ENSMUST00000002625	ENSMUSG00000002550	17.8658	19.7535	-1.10566	0.0908704	0.358223	FALSE	Uck1	uridine-cytidine kinase 1 [Source:MGI Symbol;Acc:MGI:98904]
ENSMUST00000134351	ENSMUSG00000002550	4.02389	3.10784	1.29475	0.892644	0.952895	FALSE	Uck1	uridine-cytidine kinase 1 [Source:MGI Symbol;Acc:MGI:98904]
ENSMUST00000023510	ENSMUSG00000022814	7.78667	12.0003	-1.54113	0.0118275	0.122332	TRUE	Umps	uridine monophosphate synthetase [Source:MGI Symbol;Acc:MGI:1298388]
ENSMUST00000131990	ENSMUSG00000022814	1.20041	1.90139	-1.58396	0.685535	0.853462	FALSE	Umps	uridine monophosphate synthetase [Source:MGI Symbol;Acc:MGI:1298388]
ENSMUST00000085513	ENSMUSG00000030421	15.0429	15.6872	-1.04284	0.441037	0.718466	FALSE	Uri1	URI1, prefoldin-like chaperone [Source:MGI Symbol;Acc:MGI:1342294]
TCONS_00026521	ENSMUSG00000031976	1.70599	2.42805	-1.42325	0.0897539	0.356301	FALSE	Urb2	URB2 ribosome biogenesis 2 homolog (S. cerevisiae) [Source:MGI Symbol;Acc:MGI:2681124]
TCONS_00026522	ENSMUSG00000031976	1.7387	1.7909	-1.03002	0.279268	0.602502	FALSE	Urb2	URB2 ribosome biogenesis 2 homolog (S. cerevisiae) [Source:MGI Symbol;Acc:MGI:2681124]
ENSMUST00000087867	ENSMUSG00000073016	16.8884	13.9265	1.21268	0.297321	0.609759	FALSE	Uprt	uracil phosphoribosyltransferase [Source:MGI Symbol;Acc:MGI:2685620]
ENSMUST00000031587	ENSMUSG00000029591	1.12208	2.60458	-2.32121	0.247258	0.582055	FALSE	Ung	uracil DNA glycosylase [Source:MGI Symbol;Acc:MGI:109352]
ENSMUST00000102584	ENSMUSG00000029591	2.4713	2.83065	-1.14541	0.502839	0.747692	FALSE	Ung	uracil DNA glycosylase [Source:MGI Symbol;Acc:MGI:109352]
TCONS_00010379	ENSMUSG00000068284	3.00671	0.172961	17.3837	0.300367	0.612133	FALSE	Usf3	upstream transcription factor family member 3 [Source:MGI Symbol;Acc:MGI:2685454]
ENSMUST00000119746	ENSMUSG00000068284	2.00935	0.208937	9.617	0.346723	0.652195	FALSE	Usf3	upstream transcription factor family member 3 [Source:MGI Symbol;Acc:MGI:2685454]
ENSMUST00000168731	ENSMUSG00000058239	2.11831	1.53941	1.37605	0.199629	0.536911	FALSE	Usf2	upstream transcription factor 2 [Source:MGI Symbol;Acc:MGI:99961]
TCONS_00024953	ENSMUSG00000058239	0.921521	2.23894	-2.42961	0.25621	0.589742	FALSE	Usf2	upstream transcription factor 2 [Source:MGI Symbol;Acc:MGI:99961]
ENSMUST00000058860	ENSMUSG00000058239	17.5832	17.8918	-1.01755	0.270468	0.601435	FALSE	Usf2	upstream transcription factor 2 [Source:MGI Symbol;Acc:MGI:99961]
TCONS_00024954	ENSMUSG00000058239	2.31146	4.32362	-1.87052	0.332379	0.641522	FALSE	Usf2	upstream transcription factor 2 [Source:MGI Symbol;Acc:MGI:99961]
ENSMUST00000108119	ENSMUSG00000058239	3.71172	3.41612	1.08653	0.920319	0.965615	FALSE	Usf2	upstream transcription factor 2 [Source:MGI Symbol;Acc:MGI:99961]
ENSMUST00000167285	ENSMUSG00000058239	3.87116	3.51308	1.10193	0.982544	0.992232	FALSE	Usf2	upstream transcription factor 2 [Source:MGI Symbol;Acc:MGI:99961]
ENSMUST00000107123	ENSMUSG00000020923	2.24188	0.598127	3.74817	0.422601	0.713457	FALSE	Ubtf	upstream binding transcription factor, RNA polymerase I [Source:MGI Symbol;Acc:MGI:98512]
ENSMUST00000107119	ENSMUSG00000020923	0.650129	9.02962	-13.889	0.440815	0.718466	FALSE	Ubtf	upstream binding transcription factor, RNA polymerase I [Source:MGI Symbol;Acc:MGI:98512]
ENSMUST00000173870	ENSMUSG00000020923	2.27348	7.1073	-3.12618	0.589475	0.797221	FALSE	Ubtf	upstream binding transcription factor, RNA polymerase I [Source:MGI Symbol;Acc:MGI:98512]
ENSMUST00000079589	ENSMUSG00000020923	4.474	2.96837	1.50722	0.726379	0.87685	FALSE	Ubtf	upstream binding transcription factor, RNA polymerase I [Source:MGI Symbol;Acc:MGI:98512]
ENSMUST00000006754	ENSMUSG00000020923	3.77695	3.4006	1.11067	0.854877	0.934618	FALSE	Ubtf	upstream binding transcription factor, RNA polymerase I [Source:MGI Symbol;Acc:MGI:98512]
ENSMUST00000174302	ENSMUSG00000020923	1.73423	0.681745	2.54381	0.872044	0.943284	FALSE	Ubtf	upstream binding transcription factor, RNA polymerase I [Source:MGI Symbol;Acc:MGI:98512]
ENSMUST00000178839	ENSMUSG00000020923	4.15292	3.73727	1.11122	0.890059	0.951568	FALSE	Ubtf	upstream binding transcription factor, RNA polymerase I [Source:MGI Symbol;Acc:MGI:98512]
ENSMUST00000107117	ENSMUSG00000020923	4.28238	3.85322	1.11138	0.940221	0.97476	FALSE	Ubtf	upstream binding transcription factor, RNA polymerase I [Source:MGI Symbol;Acc:MGI:98512]
TCONS_00028068	ENSMUSG00000009741	4.10209	6.08312	-1.48293	0.824494	0.922403	FALSE	Ubp1	upstream binding protein 1 [Source:MGI Symbol;Acc:MGI:104889]
ENSMUST00000214095	ENSMUSG00000009741	2.68011	2.13399	1.25592	0.984305	0.993026	FALSE	Ubp1	upstream binding protein 1 [Source:MGI Symbol;Acc:MGI:104889]
TCONS_00014233	ENSMUSG00000043241	2.30008	1.39841	1.64478	0.644622	0.829695	FALSE	Upf2	UPF2 regulator of nonsense transcripts homolog (yeast) [Source:MGI Symbol;Acc:MGI:2449307]
TCONS_00014232	ENSMUSG00000043241	3.37399	4.50968	-1.3366	0.718262	0.87285	FALSE	Upf2	UPF2 regulator of nonsense transcripts homolog (yeast) [Source:MGI Symbol;Acc:MGI:2449307]
ENSMUST00000060092	ENSMUSG00000043241	2.74005	2.09866	1.30562	0.849423	0.932229	FALSE	Upf2	UPF2 regulator of nonsense transcripts homolog (yeast) [Source:MGI Symbol;Acc:MGI:2449307]
TCONS_00026824	ENSMUSG00000058301	27.5356	33.5104	-1.21698	0.107864	0.393785	FALSE	Upf1	UPF1 regulator of nonsense transcripts homolog (yeast) [Source:MGI Symbol;Acc:MGI:107995]
TCONS_00026825	ENSMUSG00000058301	14.3972	14.1373	1.01839	0.86927	0.941823	FALSE	Upf1	UPF1 regulator of nonsense transcripts homolog (yeast) [Source:MGI Symbol;Acc:MGI:107995]
ENSMUST00000106452	ENSMUSG00000020770	1.83076	3.01971	-1.64943	0.571122	0.785178	FALSE	Unk	unkempt family zinc finger [Source:MGI Symbol;Acc:MGI:2442456]
ENSMUST00000021116	ENSMUSG00000020770	5.83005	4.16004	1.40144	0.614535	0.811501	FALSE	Unk	unkempt family zinc finger [Source:MGI Symbol;Acc:MGI:2442456]
ENSMUST00000110054	ENSMUSG00000002395	0.815509	1.28783	-1.57917	0.22544	0.562597	FALSE	Use1	unconventional SNARE in the ER 1 homolog (S. cerevisiae) [Source:MGI Symbol;Acc:MGI:1914273]
TCONS_00028938	ENSMUSG00000040936	32.7946	38.6465	-1.17844	0.425177	0.714068	FALSE	Ulk4	unc-51-like kinase 4 [Source:MGI Symbol;Acc:MGI:1921622]
ENSMUST00000213212	ENSMUSG00000032308	2.30787	3.37796	-1.46367	0.906492	0.958846	FALSE	Ulk3	unc-51-like kinase 3 [Source:MGI Symbol;Acc:MGI:1918992]
ENSMUST00000004920	ENSMUSG00000004798	12.9463	7.30105	1.77321	0.00278209	0.0644751	TRUE	Ulk2	unc-51 like kinase 2 [Source:MGI Symbol;Acc:MGI:1352758]
ENSMUST00000031490	ENSMUSG00000029512	4.32138	3.85797	1.12012	0.380803	0.682606	FALSE	Ulk1	unc-51 like kinase 1 [Source:MGI Symbol;Acc:MGI:1270126]
ENSMUST00000200299	ENSMUSG00000029512	3.37466	2.74162	1.2309	0.772428	0.899101	FALSE	Ulk1	unc-51 like kinase 1 [Source:MGI Symbol;Acc:MGI:1270126]
ENSMUST00000134184	ENSMUSG00000026111	3.00013	1.52517	1.96707	0.026284	0.182564	TRUE	Unc50	unc-50 homolog [Source:MGI Symbol;Acc:MGI:1914637]
ENSMUST00000027285	ENSMUSG00000026111	17.8816	15.2708	1.17097	0.173222	0.503287	FALSE	Unc50	unc-50 homolog [Source:MGI Symbol;Acc:MGI:1914637]
ENSMUST00000118059	ENSMUSG00000026111	1.94353	1.16167	1.67305	0.281762	0.604301	FALSE	Unc50	unc-50 homolog [Source:MGI Symbol;Acc:MGI:1914637]
ENSMUST00000114925	ENSMUSG00000026111	8.56217	7.54317	1.13509	0.753858	0.890013	FALSE	Unc50	unc-50 homolog [Source:MGI Symbol;Acc:MGI:1914637]
ENSMUST00000193979	ENSMUSG00000026111	1.9949	3.22416	-1.6162	0.772582	0.899101	FALSE	Unc50	unc-50 homolog [Source:MGI Symbol;Acc:MGI:1914637]
ENSMUST00000144617	ENSMUSG00000026111	0.886639	1.09979	-1.24041	0.89993	0.955062	FALSE	Unc50	unc-50 homolog [Source:MGI Symbol;Acc:MGI:1914637]
ENSMUST00000106236	ENSMUSG00000059921	21.4389	17.9308	1.19565	0.20623	0.542227	FALSE	Unc5c	unc-5 netrin receptor C [Source:MGI Symbol;Acc:MGI:1095412]
ENSMUST00000107368	ENSMUSG00000030533	3.13531	1.04891	2.98911	0.455821	0.729663	FALSE	Unc45a	unc-45 myosin chaperone A [Source:MGI Symbol;Acc:MGI:2142246]
TCONS_00025205	ENSMUSG00000030533	11.7417	11.6679	1.00632	0.548592	0.771612	FALSE	Unc45a	unc-45 myosin chaperone A [Source:MGI Symbol;Acc:MGI:2142246]
ENSMUST00000154428	ENSMUSG00000030533	2.45184	1.59642	1.53584	0.877764	0.945532	FALSE	Unc45a	unc-45 myosin chaperone A [Source:MGI Symbol;Acc:MGI:2142246]
ENSMUST00000060798	ENSMUSG00000046562	12.8649	12.715	1.01179	0.478959	0.745325	FALSE	Unc119b	unc-119 lipid binding chaperone B [Source:MGI Symbol;Acc:MGI:2147162]
ENSMUST00000002127	ENSMUSG00000002058	10.5364	13.5489	-1.28591	0.545931	0.769379	FALSE	Unc119	unc-119 lipid binding chaperone [Source:MGI Symbol;Acc:MGI:1328357]
ENSMUST00000108295	ENSMUSG00000002058	2.11293	3.06785	-1.45194	0.808774	0.915223	FALSE	Unc119	unc-119 lipid binding chaperone [Source:MGI Symbol;Acc:MGI:1328357]
ENSMUST00000149161	ENSMUSG00000002058	1.40714	1.48329	-1.05412	0.98878	0.994432	FALSE	Unc119	unc-119 lipid binding chaperone [Source:MGI Symbol;Acc:MGI:1328357]
ENSMUST00000159433	ENSMUSG00000089862	3.13867	0.337709	9.294	0.325427	0.633986	FALSE	Umad1	UMAP1-MVP12 associated (UMA) domain containing 1 [Source:MGI Symbol;Acc:MGI:3840148]
ENSMUST00000159168	ENSMUSG00000089862	1.40648	2.84063	-2.01967	0.905082	0.95803	FALSE	Umad1	UMAP1-MVP12 associated (UMA) domain containing 1 [Source:MGI Symbol;Acc:MGI:3840148]
TCONS_00002325	ENSMUSG00000019951	6.89695	4.29427	1.60608	0.551019	0.773567	FALSE	Uhrf1bp1l	UHRF1 (ICBP90) binding protein 1-like [Source:MGI Symbol;Acc:MGI:2442888]
ENSMUST00000114849	ENSMUSG00000039512	8.6985	6.2951	1.38179	0.00354973	0.0732676	FALSE	Uhrf1bp1	UHRF1 (ICBP90) binding protein 1 [Source:MGI Symbol;Acc:MGI:3041238]
ENSMUST00000130412	ENSMUSG00000031634	3.04296	3.2365	-1.0636	0.700797	0.862784	FALSE	Ufsp2	UFM1-specific peptidase 2 [Source:MGI Symbol;Acc:MGI:1913679]
ENSMUST00000034051	ENSMUSG00000031634	8.4343	7.19068	1.17295	0.843145	0.92849	FALSE	Ufsp2	UFM1-specific peptidase 2 [Source:MGI Symbol;Acc:MGI:1913679]
ENSMUST00000094398	ENSMUSG00000043262	5.03753	6.24996	-1.24068	0.0511708	0.263962	FALSE	Uevld	UEV and lactate/malate dehyrogenase domains [Source:MGI Symbol;Acc:MGI:1860490]
ENSMUST00000102925	ENSMUSG00000026956	53.1054	59.533	-1.12103	0.47059	0.739652	FALSE	Uap1l1	UDP-N-acteylglucosamine pyrophosphorylase 1-like 1 [Source:MGI Symbol;Acc:MGI:2443318]
ENSMUST00000111350	ENSMUSG00000026670	9.60017	6.18743	1.55156	0.0264558	0.183296	TRUE	Uap1	UDP-N-acetylglucosamine pyrophosphorylase 1 [Source:MGI Symbol;Acc:MGI:1334459]
ENSMUST00000111351	ENSMUSG00000026670	3.75645	2.31897	1.61988	0.474991	0.741915	FALSE	Uap1	UDP-N-acetylglucosamine pyrophosphorylase 1 [Source:MGI Symbol;Acc:MGI:1334459]
ENSMUST00000027981	ENSMUSG00000026670	2.14956	1.20182	1.78859	0.542943	0.767912	FALSE	Uap1	UDP-N-acetylglucosamine pyrophosphorylase 1 [Source:MGI Symbol;Acc:MGI:1334459]
TCONS_00001084	ENSMUSG00000057363	2.01377	0.682957	2.94861	0.391371	0.691653	FALSE	Uxs1	UDP-glucuronate decarboxylase 1 [Source:MGI Symbol;Acc:MGI:1915133]
TCONS_00001082	ENSMUSG00000057363	3.18231	6.23469	-1.95917	0.473466	0.740812	FALSE	Uxs1	UDP-glucuronate decarboxylase 1 [Source:MGI Symbol;Acc:MGI:1915133]
ENSMUST00000060895	ENSMUSG00000001891	74.1246	52.256	1.41849	0.497714	0.747692	FALSE	Ugp2	UDP-glucose pyrophosphorylase 2 [Source:MGI Symbol;Acc:MGI:2183447]
ENSMUST00000102875	ENSMUSG00000001891	301.418	251.301	1.19943	0.590082	0.79735	FALSE	Ugp2	UDP-glucose pyrophosphorylase 2 [Source:MGI Symbol;Acc:MGI:2183447]
ENSMUST00000173166	ENSMUSG00000037470	1.4236	0.422034	3.37318	0.540777	0.766555	FALSE	Uggt1	UDP-glucose glycoprotein glucosyltransferase 1 [Source:MGI Symbol;Acc:MGI:2443162]
ENSMUST00000174266	ENSMUSG00000037470	26.4378	18.1632	1.45557	0.631708	0.821979	FALSE	Uggt1	UDP-glucose glycoprotein glucosyltransferase 1 [Source:MGI Symbol;Acc:MGI:2443162]
ENSMUST00000046875	ENSMUSG00000037470	21.2046	21.7935	-1.02777	0.875363	0.944652	FALSE	Uggt1	UDP-glucose glycoprotein glucosyltransferase 1 [Source:MGI Symbol;Acc:MGI:2443162]
ENSMUST00000031103	ENSMUSG00000029201	14.7048	14.7168	-1.00082	0.883072	0.947713	FALSE	Ugdh	UDP-glucose dehydrogenase [Source:MGI Symbol;Acc:MGI:1306785]
ENSMUST00000030074	ENSMUSG00000028381	39.5236	19.2235	2.05601	0.00108582	0.0498815	TRUE	Ugcg	UDP-glucose ceramide glucosyltransferase [Source:MGI Symbol;Acc:MGI:1332243]
ENSMUST00000136822	ENSMUSG00000069920	1.26131	0.108973	11.5745	0.244199	0.579669	FALSE	B3gnt9	UDP-GlcNAc:betaGal beta-1,3-N-acetylglucosaminyltransferase 9 [Source:MGI Symbol;Acc:MGI:2142841]
ENSMUST00000093217	ENSMUSG00000069920	1.851	2.27563	-1.22941	0.561351	0.779816	FALSE	B3gnt9	UDP-GlcNAc:betaGal beta-1,3-N-acetylglucosaminyltransferase 9 [Source:MGI Symbol;Acc:MGI:2142841]
ENSMUST00000055549	ENSMUSG00000051650	7.93772	2.72059	2.91764	0.000253725	0.0380874	TRUE	B3gnt2	UDP-GlcNAc:betaGal beta-1,3-N-acetylglucosaminyltransferase 2 [Source:MGI Symbol;Acc:MGI:1889505]
ENSMUST00000220681	ENSMUSG00000039242	1.68331	0.879321	1.91432	0.467565	0.737421	FALSE	B3galnt2	UDP-GalNAc:betaGlcNAc beta 1,3-galactosaminyltransferase, polypeptide 2 [Source:MGI Symbol;Acc:MGI:2145517]
ENSMUST00000109221	ENSMUSG00000017929	67.0225	32.0702	2.08986	9.19e-05	0.0331924	TRUE	B4galt5	UDP-Gal:betaGlcNAc beta 1,4-galactosyltransferase, polypeptide 5 [Source:MGI Symbol;Acc:MGI:1927169]
ENSMUST00000114712	ENSMUSG00000022793	0.127424	0.987022	-7.74596	0.293749	0.606622	FALSE	B4galt4	UDP-Gal:betaGlcNAc beta 1,4-galactosyltransferase, polypeptide 4 [Source:MGI Symbol;Acc:MGI:1928387]
ENSMUST00000154902	ENSMUSG00000022793	3.44115	2.21253	1.5553	0.572252	0.785881	FALSE	B4galt4	UDP-Gal:betaGlcNAc beta 1,4-galactosyltransferase, polypeptide 4 [Source:MGI Symbol;Acc:MGI:1928387]
TCONS_00010364	ENSMUSG00000022793	2.16705	1.96982	1.10013	0.988704	0.994432	FALSE	B4galt4	UDP-Gal:betaGlcNAc beta 1,4-galactosyltransferase, polypeptide 4 [Source:MGI Symbol;Acc:MGI:1928387]
ENSMUST00000052185	ENSMUSG00000050796	1.31695	2.07685	-1.57702	0.981814	0.99189	FALSE	B3galt6	UDP-Gal:betaGal beta 1,3-galactosyltransferase, polypeptide 6 [Source:MGI Symbol;Acc:MGI:2152819]
ENSMUST00000115151	ENSMUSG00000053774	12.805	10.4752	1.22242	0.0116621	0.121752	FALSE	Ubxn7	UBX domain protein 7 [Source:MGI Symbol;Acc:MGI:2146388]
ENSMUST00000132804	ENSMUSG00000019578	3.33178	0.995729	3.34607	0.339406	0.646466	FALSE	Ubxn6	UBX domain protein 6 [Source:MGI Symbol;Acc:MGI:1913780]
ENSMUST00000151943	ENSMUSG00000019578	2.47436	1.58666	1.55948	0.851021	0.932953	FALSE	Ubxn6	UBX domain protein 6 [Source:MGI Symbol;Acc:MGI:1913780]
ENSMUST00000027592	ENSMUSG00000026353	25.7536	18.2563	1.41067	0.00860753	0.107208	FALSE	Ubxn4	UBX domain protein 4 [Source:MGI Symbol;Acc:MGI:1915062]
ENSMUST00000020962	ENSMUSG00000020634	9.60722	7.45414	1.28884	0.162569	0.489186	FALSE	Ubxn2a	UBX domain protein 2A [Source:MGI Symbol;Acc:MGI:2442310]
ENSMUST00000166407	ENSMUSG00000071655	37.9274	41.7872	-1.10177	0.731341	0.878927	FALSE	Ubxn1	UBX domain protein 1 [Source:MGI Symbol;Acc:MGI:1289301]
ENSMUST00000096255	ENSMUSG00000071655	12.8598	13.1465	-1.02229	0.873197	0.943662	FALSE	Ubxn1	UBX domain protein 1 [Source:MGI Symbol;Acc:MGI:1289301]
ENSMUST00000001162	ENSMUSG00000001134	2.81355	3.76539	-1.33831	0.193694	0.532464	FALSE	Uxt	ubiquitously expressed prefoldin like chaperone [Source:MGI Symbol;Acc:MGI:1277988]
ENSMUST00000123836	ENSMUSG00000001134	5.2315	4.42432	1.18244	0.823971	0.92233	FALSE	Uxt	ubiquitously expressed prefoldin like chaperone [Source:MGI Symbol;Acc:MGI:1277988]
ENSMUST00000113038	ENSMUSG00000001228	15.6697	33.566	-2.1421	0.00107317	0.0495938	TRUE	Uhrf1	ubiquitin-like, containing PHD and RING finger domains, 1 [Source:MGI Symbol;Acc:MGI:1338889]
ENSMUST00000113039	ENSMUSG00000001228	29.136	59.3369	-2.03655	0.00455018	0.0788793	TRUE	Uhrf1	ubiquitin-like, containing PHD and RING finger domains, 1 [Source:MGI Symbol;Acc:MGI:1338889]
TCONS_00011588	ENSMUSG00000001228	0.558678	2.00031	-3.58044	0.0155868	0.139788	TRUE	Uhrf1	ubiquitin-like, containing PHD and RING finger domains, 1 [Source:MGI Symbol;Acc:MGI:1338889]
ENSMUST00000001258	ENSMUSG00000001228	3.60975	4.88608	-1.35358	0.439969	0.718268	FALSE	Uhrf1	ubiquitin-like, containing PHD and RING finger domains, 1 [Source:MGI Symbol;Acc:MGI:1338889]
ENSMUST00000025739	ENSMUSG00000024817	19.8074	18.4763	1.07204	0.392146	0.692136	FALSE	Uhrf2	ubiquitin-like, containing PHD and RING finger domains 2 [Source:MGI Symbol;Acc:MGI:1923718]
ENSMUST00000039373	ENSMUSG00000035898	9.52846	6.91211	1.37852	0.0189031	0.154456	FALSE	Uba6	ubiquitin-like modifier activating enzyme 6 [Source:MGI Symbol;Acc:MGI:1913894]
ENSMUST00000035166	ENSMUSG00000032557	18.9936	14.7307	1.28939	0.0630507	0.29594	FALSE	Uba5	ubiquitin-like modifier activating enzyme 5 [Source:MGI Symbol;Acc:MGI:1913913]
ENSMUST00000089287	ENSMUSG00000030061	43.1256	38.804	1.11137	0.647613	0.83212	FALSE	Uba3	ubiquitin-like modifier activating enzyme 3 [Source:MGI Symbol;Acc:MGI:1341217]
ENSMUST00000164744	ENSMUSG00000030061	5.3778	4.14022	1.29892	0.895428	0.954039	FALSE	Uba3	ubiquitin-like modifier activating enzyme 3 [Source:MGI Symbol;Acc:MGI:1341217]
ENSMUST00000102746	ENSMUSG00000052997	40.3506	48.1196	-1.19254	0.0132013	0.129339	FALSE	Uba2	ubiquitin-like modifier activating enzyme 2 [Source:MGI Symbol;Acc:MGI:1858313]
ENSMUST00000205711	ENSMUSG00000052997	2.52138	7.91847	-3.14052	0.110138	0.398836	FALSE	Uba2	ubiquitin-like modifier activating enzyme 2 [Source:MGI Symbol;Acc:MGI:1858313]
ENSMUST00000089217	ENSMUSG00000001924	10.9437	26.5431	-2.42542	0.196814	0.535701	FALSE	Uba1	ubiquitin-like modifier activating enzyme 1 [Source:MGI Symbol;Acc:MGI:98890]
ENSMUST00000152235	ENSMUSG00000001924	1.34952	4.25524	-3.15315	0.316409	0.626227	FALSE	Uba1	ubiquitin-like modifier activating enzyme 1 [Source:MGI Symbol;Acc:MGI:98890]
ENSMUST00000001989	ENSMUSG00000001924	93.2184	83.2846	1.11927	0.503413	0.747692	FALSE	Uba1	ubiquitin-like modifier activating enzyme 1 [Source:MGI Symbol;Acc:MGI:98890]
ENSMUST00000136915	ENSMUSG00000001924	5.85034	5.2068	1.1236	0.653496	0.834867	FALSE	Uba1	ubiquitin-like modifier activating enzyme 1 [Source:MGI Symbol;Acc:MGI:98890]
ENSMUST00000102795	ENSMUSG00000041231	19.2092	13.3244	1.44166	0.148375	0.467751	FALSE	Ublcp1	ubiquitin-like domain containing CTD phosphatase 1 [Source:MGI Symbol;Acc:MGI:1933105]
TCONS_00004728	ENSMUSG00000041231	4.99828	5.93099	-1.18661	0.418578	0.711342	FALSE	Ublcp1	ubiquitin-like domain containing CTD phosphatase 1 [Source:MGI Symbol;Acc:MGI:1933105]
ENSMUST00000216925	ENSMUSG00000055720	3.1392	1.75055	1.79326	0.144695	0.461963	FALSE	Ubl7	ubiquitin-like 7 (bone marrow stromal cell-derived) [Source:MGI Symbol;Acc:MGI:1916709]
ENSMUST00000216841	ENSMUSG00000055720	25.3189	10.3215	2.45303	0.244808	0.57981	FALSE	Ubl7	ubiquitin-like 7 (bone marrow stromal cell-derived) [Source:MGI Symbol;Acc:MGI:1916709]
ENSMUST00000217132	ENSMUSG00000055720	2.84939	3.93081	-1.37953	0.469447	0.73926	FALSE	Ubl7	ubiquitin-like 7 (bone marrow stromal cell-derived) [Source:MGI Symbol;Acc:MGI:1916709]
ENSMUST00000163329	ENSMUSG00000055720	5.91426	8.52935	-1.44217	0.668279	0.843742	FALSE	Ubl7	ubiquitin-like 7 (bone marrow stromal cell-derived) [Source:MGI Symbol;Acc:MGI:1916709]
TCONS_00027637	ENSMUSG00000055720	6.59928	6.77587	-1.02676	0.963544	0.98443	FALSE	Ubl7	ubiquitin-like 7 (bone marrow stromal cell-derived) [Source:MGI Symbol;Acc:MGI:1916709]
ENSMUST00000160682	ENSMUSG00000084786	5.63498	0.767614	7.3409	0.0556702	0.27528	FALSE	Ubl5	ubiquitin-like 5 [Source:MGI Symbol;Acc:MGI:1913427]
ENSMUST00000129414	ENSMUSG00000084786	6.60736	7.36292	-1.11435	0.112258	0.402891	FALSE	Ubl5	ubiquitin-like 5 [Source:MGI Symbol;Acc:MGI:1913427]
ENSMUST00000155676	ENSMUSG00000015290	5.6926	8.51264	-1.49539	0.122331	0.423383	FALSE	Ubl4a	ubiquitin-like 4A [Source:MGI Symbol;Acc:MGI:95049]
ENSMUST00000126117	ENSMUSG00000015290	6.44933	1.83023	3.52378	0.202387	0.53921	FALSE	Ubl4a	ubiquitin-like 4A [Source:MGI Symbol;Acc:MGI:95049]
ENSMUST00000079324	ENSMUSG00000001687	107.319	69.7463	1.53871	0.214869	0.550674	FALSE	Ubl3	ubiquitin-like 3 [Source:MGI Symbol;Acc:MGI:1344373]
ENSMUST00000201595	ENSMUSG00000001687	19.6757	51.4508	-2.61494	0.313648	0.623601	FALSE	Ubl3	ubiquitin-like 3 [Source:MGI Symbol;Acc:MGI:1344373]
ENSMUST00000138974	ENSMUSG00000062963	13.4765	12.4383	1.08346	0.694191	0.859508	FALSE	Ufc1	ubiquitin-fold modifier conjugating enzyme 1 [Source:MGI Symbol;Acc:MGI:1913405]
ENSMUST00000080001	ENSMUSG00000062963	12.039	12.5906	-1.04582	0.771134	0.898404	FALSE	Ufc1	ubiquitin-fold modifier conjugating enzyme 1 [Source:MGI Symbol;Acc:MGI:1913405]
ENSMUST00000111302	ENSMUSG00000062963	9.51078	8.46955	1.12294	0.809159	0.915375	FALSE	Ufc1	ubiquitin-fold modifier conjugating enzyme 1 [Source:MGI Symbol;Acc:MGI:1913405]
ENSMUST00000146598	ENSMUSG00000027746	15.7636	12.6546	1.24568	0.109143	0.396358	FALSE	Ufm1	ubiquitin-fold modifier 1 [Source:MGI Symbol;Acc:MGI:1915140]
TCONS_00005251	ENSMUSG00000014349	14.3769	1.56024	9.21454	0.28115	0.603931	FALSE	Ube2z	ubiquitin-conjugating enzyme E2Z [Source:MGI Symbol;Acc:MGI:1343160]
ENSMUST00000100528	ENSMUSG00000014349	25.9008	30.1279	-1.1632	0.971119	0.987297	FALSE	Ube2z	ubiquitin-conjugating enzyme E2Z [Source:MGI Symbol;Acc:MGI:1343160]
ENSMUST00000117146	ENSMUSG00000025939	14.4193	14.6522	-1.01615	0.02416	0.175118	FALSE	Ube2w	ubiquitin-conjugating enzyme E2W (putative) [Source:MGI Symbol;Acc:MGI:1914049]
ENSMUST00000027687	ENSMUSG00000026429	4.51189	9.50091	-2.10575	7.96e-05	0.0331924	TRUE	Ube2t	ubiquitin-conjugating enzyme E2T [Source:MGI Symbol;Acc:MGI:1914446]
TCONS_00024701	ENSMUSG00000060860	36.4525	79.6751	-2.18572	0.225268	0.562421	FALSE	Ube2s	ubiquitin-conjugating enzyme E2S [Source:MGI Symbol;Acc:MGI:1925141]
ENSMUST00000079496	ENSMUSG00000060860	64.0026	56.2201	1.13843	0.837883	0.927	FALSE	Ube2s	ubiquitin-conjugating enzyme E2S [Source:MGI Symbol;Acc:MGI:1925141]
ENSMUST00000040008	ENSMUSG00000036241	21.1698	20.074	1.05459	0.837988	0.927	FALSE	Ube2r2	ubiquitin-conjugating enzyme E2R 2 [Source:MGI Symbol;Acc:MGI:1914865]
ENSMUST00000129874	ENSMUSG00000036241	2.87235	3.6564	-1.27297	0.892921	0.95302	FALSE	Ube2r2	ubiquitin-conjugating enzyme E2R 2 [Source:MGI Symbol;Acc:MGI:1914865]
ENSMUST00000059555	ENSMUSG00000032307	10.8882	8.35581	1.30307	0.0463628	0.249875	FALSE	Ube2q2	ubiquitin-conjugating enzyme E2Q family member 2 [Source:MGI Symbol;Acc:MGI:2388672]
ENSMUST00000038356	ENSMUSG00000042572	38.284	42.3799	-1.10699	0.0746376	0.323638	FALSE	Ube2q1	ubiquitin-conjugating enzyme E2Q family member 1 [Source:MGI Symbol;Acc:MGI:1917343]
ENSMUST00000219741	ENSMUSG00000074781	0.0183813	1.14055	-62.0496	0.0409129	0.231957	FALSE	Ube2n	ubiquitin-conjugating enzyme E2N [Source:MGI Symbol;Acc:MGI:1934835]
TCONS_00002360	ENSMUSG00000074781	0.394055	3.10399	-7.87703	0.0659093	0.303033	FALSE	Ube2n	ubiquitin-conjugating enzyme E2N [Source:MGI Symbol;Acc:MGI:1934835]
ENSMUST00000099329	ENSMUSG00000074781	7.50543	8.06844	-1.07501	0.0745357	0.323536	FALSE	Ube2n	ubiquitin-conjugating enzyme E2N [Source:MGI Symbol;Acc:MGI:1934835]
TCONS_00002361	ENSMUSG00000074781	3.67093	1.35154	2.71612	0.378059	0.680298	FALSE	Ube2n	ubiquitin-conjugating enzyme E2N [Source:MGI Symbol;Acc:MGI:1934835]
TCONS_00024741	ENSMUSG00000005575	17.4495	16.9423	1.02994	0.234115	0.571497	FALSE	Ube2m	ubiquitin-conjugating enzyme E2M [Source:MGI Symbol;Acc:MGI:108278]
ENSMUST00000005714	ENSMUSG00000005575	9.33953	8.10531	1.15227	0.679621	0.850663	FALSE	Ube2m	ubiquitin-conjugating enzyme E2M [Source:MGI Symbol;Acc:MGI:108278]
ENSMUST00000102642	ENSMUSG00000027078	4.97917	4.38767	1.13481	0.63375	0.823056	FALSE	Ube2l6	ubiquitin-conjugating enzyme E2L 6 [Source:MGI Symbol;Acc:MGI:1914500]
TCONS_00010657	ENSMUSG00000038965	17.1959	0.225255	76.3395	0.19418	0.533004	FALSE	Ube2l3	ubiquitin-conjugating enzyme E2L 3 [Source:MGI Symbol;Acc:MGI:109240]
ENSMUST00000090192	ENSMUSG00000038965	12.6418	36.6373	-2.89811	0.234112	0.571497	FALSE	Ube2l3	ubiquitin-conjugating enzyme E2L 3 [Source:MGI Symbol;Acc:MGI:109240]
TCONS_00010656	ENSMUSG00000038965	4.38903	0.24751	17.7328	0.360287	0.665003	FALSE	Ube2l3	ubiquitin-conjugating enzyme E2L 3 [Source:MGI Symbol;Acc:MGI:109240]
TCONS_00010658	ENSMUSG00000038965	1.86491	6.33324	-3.39601	0.58238	0.792698	FALSE	Ube2l3	ubiquitin-conjugating enzyme E2L 3 [Source:MGI Symbol;Acc:MGI:109240]
ENSMUST00000202679	ENSMUSG00000029203	3.84138	10.9891	-2.86073	0.219713	0.555683	FALSE	Ube2k	ubiquitin-conjugating enzyme E2K [Source:MGI Symbol;Acc:MGI:1858216]
ENSMUST00000142407	ENSMUSG00000029203	8.69861	0.931617	9.33711	0.266091	0.598783	FALSE	Ube2k	ubiquitin-conjugating enzyme E2K [Source:MGI Symbol;Acc:MGI:1858216]
ENSMUST00000105583	ENSMUSG00000023286	9.01131	11.6706	-1.29511	0.00611879	0.0904313	FALSE	Ube2j2	ubiquitin-conjugating enzyme E2J 2 [Source:MGI Symbol;Acc:MGI:2153608]
ENSMUST00000124992	ENSMUSG00000028277	19.3199	12.1986	1.58378	0.129998	0.435667	FALSE	Ube2j1	ubiquitin-conjugating enzyme E2J 1 [Source:MGI Symbol;Acc:MGI:1926245]
ENSMUST00000135924	ENSMUSG00000028277	9.95387	10.6441	-1.06935	0.692007	0.858223	FALSE	Ube2j1	ubiquitin-conjugating enzyme E2J 1 [Source:MGI Symbol;Acc:MGI:1926245]
ENSMUST00000173084	ENSMUSG00000015120	24.4926	29.7743	-1.21565	0.0213801	0.165172	FALSE	Ube2i	ubiquitin-conjugating enzyme E2I [Source:MGI Symbol;Acc:MGI:107365]
ENSMUST00000172618	ENSMUSG00000015120	0.294967	1.37884	-4.67456	0.199427	0.536866	FALSE	Ube2i	ubiquitin-conjugating enzyme E2I [Source:MGI Symbol;Acc:MGI:107365]
ENSMUST00000172868	ENSMUSG00000015120	4.45947	5.54664	-1.24379	0.501182	0.747692	FALSE	Ube2i	ubiquitin-conjugating enzyme E2I [Source:MGI Symbol;Acc:MGI:107365]
ENSMUST00000174031	ENSMUSG00000015120	39.581	45.5849	-1.15169	0.559445	0.778796	FALSE	Ube2i	ubiquitin-conjugating enzyme E2I [Source:MGI Symbol;Acc:MGI:107365]
ENSMUST00000173621	ENSMUSG00000015120	1.7624	2.79775	-1.58747	0.799733	0.912263	FALSE	Ube2i	ubiquitin-conjugating enzyme E2I [Source:MGI Symbol;Acc:MGI:107365]
TCONS_00022906	ENSMUSG00000039159	40.7228	0.0541127	752.556	4.89e-07	0.00808419	TRUE	Ube2h	ubiquitin-conjugating enzyme E2H [Source:MGI Symbol;Acc:MGI:104632]
ENSMUST00000102993	ENSMUSG00000039159	18.3282	35.8936	-1.95837	0.0188681	0.154456	TRUE	Ube2h	ubiquitin-conjugating enzyme E2H [Source:MGI Symbol;Acc:MGI:104632]
ENSMUST00000174510	ENSMUSG00000009293	9.2843	8.06027	1.15186	0.241117	0.577828	FALSE	Ube2g2	ubiquitin-conjugating enzyme E2G 2 [Source:MGI Symbol;Acc:MGI:1343188]
ENSMUST00000138247	ENSMUSG00000020794	3.767	3.95448	-1.04977	0.449648	0.725095	FALSE	Ube2g1	ubiquitin-conjugating enzyme E2G 1 [Source:MGI Symbol;Acc:MGI:1914378]
ENSMUST00000021148	ENSMUSG00000020794	6.27712	5.65437	1.11014	0.519357	0.753234	FALSE	Ube2g1	ubiquitin-conjugating enzyme E2G 1 [Source:MGI Symbol;Acc:MGI:1914378]
ENSMUST00000191368	ENSMUSG00000034343	0.307922	8.51746	-27.6611	0.23695	0.574391	FALSE	Ube2f	ubiquitin-conjugating enzyme E2F (putative) [Source:MGI Symbol;Acc:MGI:1915171]
ENSMUST00000028398	ENSMUSG00000027011	24.6812	32.7946	-1.32872	0.00446193	0.0783363	FALSE	Ube2e3	ubiquitin-conjugating enzyme E2E 3 [Source:MGI Symbol;Acc:MGI:107412]
ENSMUST00000150727	ENSMUSG00000058317	6.80088	4.30463	1.5799	0.2748	0.601435	FALSE	Ube2e2	ubiquitin-conjugating enzyme E2E 2 [Source:MGI Symbol;Acc:MGI:2384997]
ENSMUST00000022296	ENSMUSG00000021774	31.529	38.4434	-1.2193	0.0656117	0.302529	FALSE	Ube2e1	ubiquitin-conjugating enzyme E2E 1 [Source:MGI Symbol;Acc:MGI:107411]
ENSMUST00000137510	ENSMUSG00000083844	3.57435	3.53528	1.01105	0.548453	0.771602	FALSE	Ube2d-ps	ubiquitin-conjugating enzyme E2D, pseudogene [Source:MGI Symbol;Acc:MGI:1913774]
ENSMUST00000196878	ENSMUSG00000078578	18.3291	20.8572	-1.13792	0.232938	0.57091	FALSE	Ube2d3	ubiquitin-conjugating enzyme E2D 3 [Source:MGI Symbol;Acc:MGI:1913355]
ENSMUST00000106291	ENSMUSG00000078578	60.2502	74.2226	-1.23191	0.315631	0.625439	FALSE	Ube2d3	ubiquitin-conjugating enzyme E2D 3 [Source:MGI Symbol;Acc:MGI:1913355]
ENSMUST00000197859	ENSMUSG00000078578	8.63841	8.77701	-1.01604	0.784127	0.905273	FALSE	Ube2d3	ubiquitin-conjugating enzyme E2D 3 [Source:MGI Symbol;Acc:MGI:1913355]
ENSMUST00000170693	ENSMUSG00000091896	37.7288	38.9822	-1.03322	0.0907032	0.358093	FALSE	Ube2d2a	ubiquitin-conjugating enzyme E2D 2A [Source:MGI Symbol;Acc:MGI:1930715]
ENSMUST00000020085	ENSMUSG00000019927	14.391	11.4723	1.25442	0.0353007	0.212601	FALSE	Ube2d1	ubiquitin-conjugating enzyme E2D 1 [Source:MGI Symbol;Acc:MGI:2384911]
ENSMUST00000088248	ENSMUSG00000001403	24.0279	54.3592	-2.26233	0.00276071	0.0644751	TRUE	Ube2c	ubiquitin-conjugating enzyme E2C [Source:MGI Symbol;Acc:MGI:1915862]
ENSMUST00000020657	ENSMUSG00000020390	74.5733	49.9213	1.49382	0.0109027	0.117641	FALSE	Ube2b	ubiquitin-conjugating enzyme E2B [Source:MGI Symbol;Acc:MGI:102944]
ENSMUST00000016452	ENSMUSG00000016308	12.6922	10.6473	1.19206	0.831055	0.925521	FALSE	Ube2a	ubiquitin-conjugating enzyme E2A [Source:MGI Symbol;Acc:MGI:102959]
TCONS_00010631	ENSMUSG00000022674	3.24797	0.014451	224.758	0.0518598	0.265766	FALSE	Ube2v2	ubiquitin-conjugating enzyme E2 variant 2 [Source:MGI Symbol;Acc:MGI:1917870]
TCONS_00010628	ENSMUSG00000022674	0.0187167	1.48179	-79.1696	0.283287	0.604301	FALSE	Ube2v2	ubiquitin-conjugating enzyme E2 variant 2 [Source:MGI Symbol;Acc:MGI:1917870]
ENSMUST00000115777	ENSMUSG00000022674	0.862203	0.704049	1.22463	0.421714	0.713265	FALSE	Ube2v2	ubiquitin-conjugating enzyme E2 variant 2 [Source:MGI Symbol;Acc:MGI:1917870]
ENSMUST00000115776	ENSMUSG00000022674	0.0390643	3.12538	-80.006	0.535299	0.762356	FALSE	Ube2v2	ubiquitin-conjugating enzyme E2 variant 2 [Source:MGI Symbol;Acc:MGI:1917870]
TCONS_00010627	ENSMUSG00000022674	3.12654	2.78946	1.12084	0.606747	0.806488	FALSE	Ube2v2	ubiquitin-conjugating enzyme E2 variant 2 [Source:MGI Symbol;Acc:MGI:1917870]
ENSMUST00000109207	ENSMUSG00000078923	3.45187	5.62526	-1.62963	0.0654625	0.302323	FALSE	Ube2v1	ubiquitin-conjugating enzyme E2 variant 1 [Source:MGI Symbol;Acc:MGI:1913839]
ENSMUST00000060645	ENSMUSG00000078923	25.5323	21.5596	1.18427	0.27185	0.601435	FALSE	Ube2v1	ubiquitin-conjugating enzyme E2 variant 1 [Source:MGI Symbol;Acc:MGI:1913839]
ENSMUST00000144628	ENSMUSG00000078923	4.52514	2.69956	1.67625	0.291021	0.604654	FALSE	Ube2v1	ubiquitin-conjugating enzyme E2 variant 1 [Source:MGI Symbol;Acc:MGI:1913839]
ENSMUST00000151365	ENSMUSG00000078923	2.60391	1.83078	1.42229	0.962979	0.984286	FALSE	Ube2v1	ubiquitin-conjugating enzyme E2 variant 1 [Source:MGI Symbol;Acc:MGI:1913839]
ENSMUST00000172643	ENSMUSG00000028960	3.49458	4.35553	-1.24637	0.49192	0.747692	FALSE	Ube4b	ubiquitination factor E4B [Source:MGI Symbol;Acc:MGI:1927086]
ENSMUST00000084123	ENSMUSG00000028960	5.28061	6.44609	-1.22071	0.529834	0.760105	FALSE	Ube4b	ubiquitination factor E4B [Source:MGI Symbol;Acc:MGI:1927086]
ENSMUST00000103212	ENSMUSG00000028960	15.3593	15.7321	-1.02428	0.630683	0.821473	FALSE	Ube4b	ubiquitination factor E4B [Source:MGI Symbol;Acc:MGI:1927086]
TCONS_00028419	ENSMUSG00000059890	15.2588	10.4441	1.461	0.00548271	0.0867037	FALSE	Ube4a	ubiquitination factor E4A [Source:MGI Symbol;Acc:MGI:2154580]
ENSMUST00000199834	ENSMUSG00000042520	1.49473	3.47508	-2.32488	0.100506	0.377508	FALSE	Ubap2l	ubiquitin-associated protein 2-like [Source:MGI Symbol;Acc:MGI:1921633]
TCONS_00017774	ENSMUSG00000042520	3.55243	1.53237	2.31826	0.124301	0.426668	FALSE	Ubap2l	ubiquitin-associated protein 2-like [Source:MGI Symbol;Acc:MGI:1921633]
TCONS_00017775	ENSMUSG00000042520	4.78734	1.75055	2.73477	0.174088	0.504191	FALSE	Ubap2l	ubiquitin-associated protein 2-like [Source:MGI Symbol;Acc:MGI:1921633]
TCONS_00017777	ENSMUSG00000042520	9.63138	12.4051	-1.28799	0.219888	0.555806	FALSE	Ubap2l	ubiquitin-associated protein 2-like [Source:MGI Symbol;Acc:MGI:1921633]
TCONS_00017778	ENSMUSG00000042520	5.3052	3.41515	1.55343	0.358942	0.663576	FALSE	Ubap2l	ubiquitin-associated protein 2-like [Source:MGI Symbol;Acc:MGI:1921633]
ENSMUST00000195995	ENSMUSG00000042520	3.08318	1.31951	2.33661	0.415025	0.709242	FALSE	Ubap2l	ubiquitin-associated protein 2-like [Source:MGI Symbol;Acc:MGI:1921633]
TCONS_00017773	ENSMUSG00000042520	1.62499	2.07047	-1.27414	0.717737	0.872404	FALSE	Ubap2l	ubiquitin-associated protein 2-like [Source:MGI Symbol;Acc:MGI:1921633]
TCONS_00017776	ENSMUSG00000042520	3.48865	3.13503	1.1128	0.744194	0.885367	FALSE	Ubap2l	ubiquitin-associated protein 2-like [Source:MGI Symbol;Acc:MGI:1921633]
TCONS_00017779	ENSMUSG00000042520	3.98418	3.1238	1.27543	0.8328	0.925919	FALSE	Ubap2l	ubiquitin-associated protein 2-like [Source:MGI Symbol;Acc:MGI:1921633]
ENSMUST00000196843	ENSMUSG00000042520	9.00637	7.16424	1.25713	0.984914	0.993276	FALSE	Ubap2l	ubiquitin-associated protein 2-like [Source:MGI Symbol;Acc:MGI:1921633]
ENSMUST00000108068	ENSMUSG00000028433	0.028607	2.40237	-83.9784	0.249359	0.584453	FALSE	Ubap2	ubiquitin-associated protein 2 [Source:MGI Symbol;Acc:MGI:1916176]
ENSMUST00000030143	ENSMUSG00000028433	23.4408	19.1805	1.22211	0.920655	0.965724	FALSE	Ubap2	ubiquitin-associated protein 2 [Source:MGI Symbol;Acc:MGI:1916176]
ENSMUST00000072866	ENSMUSG00000028437	14.6932	10.3849	1.41486	0.18552	0.520386	FALSE	Ubap1	ubiquitin-associated protein 1 [Source:MGI Symbol;Acc:MGI:2149543]
ENSMUST00000065111	ENSMUSG00000040455	3.45508	0.720303	4.7967	0.057375	0.280111	FALSE	Usp45	ubiquitin specific petidase 45 [Source:MGI Symbol;Acc:MGI:101850]
ENSMUST00000040429	ENSMUSG00000040455	2.90867	0.980579	2.96627	0.103122	0.38313	FALSE	Usp45	ubiquitin specific petidase 45 [Source:MGI Symbol;Acc:MGI:101850]
TCONS_00018229	ENSMUSG00000040455	2.096	6.44184	-3.0734	0.176371	0.507537	FALSE	Usp45	ubiquitin specific petidase 45 [Source:MGI Symbol;Acc:MGI:101850]
ENSMUST00000148304	ENSMUSG00000040455	2.23345	0.980578	2.27769	0.30506	0.616913	FALSE	Usp45	ubiquitin specific petidase 45 [Source:MGI Symbol;Acc:MGI:101850]
ENSMUST00000121416	ENSMUSG00000041264	2.93925	0.47887	6.13789	0.24385	0.579323	FALSE	Uspl1	ubiquitin specific peptidase like 1 [Source:MGI Symbol;Acc:MGI:2442342]
ENSMUST00000089302	ENSMUSG00000031010	3.78968	11.4254	-3.01488	0.146909	0.465566	FALSE	Usp9x	ubiquitin specific peptidase 9, X chromosome [Source:MGI Symbol;Acc:MGI:894681]
TCONS_00029243	ENSMUSG00000031010	31.7906	30.1115	1.05576	0.15785	0.48129	FALSE	Usp9x	ubiquitin specific peptidase 9, X chromosome [Source:MGI Symbol;Acc:MGI:894681]
TCONS_00029239	ENSMUSG00000031010	17.6514	3.77407	4.67701	0.203536	0.539608	FALSE	Usp9x	ubiquitin specific peptidase 9, X chromosome [Source:MGI Symbol;Acc:MGI:894681]
TCONS_00029241	ENSMUSG00000031010	2.00579	0.265274	7.56118	0.427188	0.714068	FALSE	Usp9x	ubiquitin specific peptidase 9, X chromosome [Source:MGI Symbol;Acc:MGI:894681]
TCONS_00029242	ENSMUSG00000031010	3.06468	4.76758	-1.55565	0.429804	0.714068	FALSE	Usp9x	ubiquitin specific peptidase 9, X chromosome [Source:MGI Symbol;Acc:MGI:894681]
TCONS_00029240	ENSMUSG00000031010	1.54482	3.51647	-2.2763	0.623993	0.817495	FALSE	Usp9x	ubiquitin specific peptidase 9, X chromosome [Source:MGI Symbol;Acc:MGI:894681]
ENSMUST00000028841	ENSMUSG00000027363	17.0035	13.2665	1.28169	0.355308	0.659792	FALSE	Usp8	ubiquitin specific peptidase 8 [Source:MGI Symbol;Acc:MGI:1934029]
TCONS_00014976	ENSMUSG00000027363	0.913392	0.611343	1.49407	0.915691	0.963217	FALSE	Usp8	ubiquitin specific peptidase 8 [Source:MGI Symbol;Acc:MGI:1934029]
ENSMUST00000161046	ENSMUSG00000022710	16.8303	19.9274	-1.18402	0.336584	0.645457	FALSE	Usp7	ubiquitin specific peptidase 7 [Source:MGI Symbol;Acc:MGI:2182061]
ENSMUST00000160326	ENSMUSG00000022710	10.5489	8.70219	1.21221	0.405786	0.701976	FALSE	Usp7	ubiquitin specific peptidase 7 [Source:MGI Symbol;Acc:MGI:2182061]
ENSMUST00000022356	ENSMUSG00000034235	3.14298	1.75717	1.78866	0.251414	0.58636	FALSE	Usp54	ubiquitin specific peptidase 54 [Source:MGI Symbol;Acc:MGI:1926037]
ENSMUST00000035340	ENSMUSG00000034235	0.000476	0.926793	-1947.04	0.2887	0.604301	FALSE	Usp54	ubiquitin specific peptidase 54 [Source:MGI Symbol;Acc:MGI:1926037]
ENSMUST00000090379	ENSMUSG00000039701	4.02156	1.88122	2.13774	0.0813723	0.338697	FALSE	Usp53	ubiquitin specific peptidase 53 [Source:MGI Symbol;Acc:MGI:2139607]
ENSMUST00000047510	ENSMUSG00000038429	5.47093	7.43531	-1.35906	0.127121	0.430931	FALSE	Usp5	ubiquitin specific peptidase 5 (isopeptidase T) [Source:MGI Symbol;Acc:MGI:1347343]
ENSMUST00000122110	ENSMUSG00000038429	37.9521	37.7122	1.00636	0.225342	0.562437	FALSE	Usp5	ubiquitin specific peptidase 5 (isopeptidase T) [Source:MGI Symbol;Acc:MGI:1347343]
TCONS_00018862	ENSMUSG00000043411	2.96315	2.23268	1.32717	0.195461	0.534154	FALSE	Usp48	ubiquitin specific peptidase 48 [Source:MGI Symbol;Acc:MGI:2158502]
ENSMUST00000055131	ENSMUSG00000043411	2.65914	2.01076	1.32246	0.579622	0.790906	FALSE	Usp48	ubiquitin specific peptidase 48 [Source:MGI Symbol;Acc:MGI:2158502]
ENSMUST00000215510	ENSMUSG00000059263	21.5962	19.981	1.08083	0.324815	0.633577	FALSE	Usp47	ubiquitin specific peptidase 47 [Source:MGI Symbol;Acc:MGI:1922246]
ENSMUST00000210309	ENSMUSG00000059263	1.56619	2.43578	-1.55522	0.352745	0.658133	FALSE	Usp47	ubiquitin specific peptidase 47 [Source:MGI Symbol;Acc:MGI:1922246]
TCONS_00024378	ENSMUSG00000059263	7.03795	4.2584	1.65272	0.797832	0.911307	FALSE	Usp47	ubiquitin specific peptidase 47 [Source:MGI Symbol;Acc:MGI:1922246]
ENSMUST00000068058	ENSMUSG00000054814	6.73583	9.07772	-1.34768	0.00107966	0.0497366	FALSE	Usp46	ubiquitin specific peptidase 46 [Source:MGI Symbol;Acc:MGI:1916977]
ENSMUST00000194959	ENSMUSG00000032612	24.0891	22.945	1.04986	0.156379	0.478747	FALSE	Usp4	ubiquitin specific peptidase 4 (proto-oncogene) [Source:MGI Symbol;Acc:MGI:98905]
TCONS_00023138	ENSMUSG00000056305	3.93262	4.50673	-1.14599	0.316083	0.626033	FALSE	Usp39	ubiquitin specific peptidase 39 [Source:MGI Symbol;Acc:MGI:107622]
ENSMUST00000070345	ENSMUSG00000056305	18.4824	20.2604	-1.0962	0.332628	0.641572	FALSE	Usp39	ubiquitin specific peptidase 39 [Source:MGI Symbol;Acc:MGI:107622]
TCONS_00001250	ENSMUSG00000033364	5.94909	8.19731	-1.37791	0.35606	0.660592	FALSE	Usp37	ubiquitin specific peptidase 37 [Source:MGI Symbol;Acc:MGI:2442483]
TCONS_00003411	ENSMUSG00000056342	18.7056	16.3644	1.14307	0.261411	0.594599	FALSE	Usp34	ubiquitin specific peptidase 34 [Source:MGI Symbol;Acc:MGI:109473]
TCONS_00017409	ENSMUSG00000025437	0.307973	5.14465	-16.7048	0.0284957	0.190332	TRUE	Usp33	ubiquitin specific peptidase 33 [Source:MGI Symbol;Acc:MGI:2159711]
TCONS_00017405	ENSMUSG00000025437	7.19376	3.52764	2.03926	0.25487	0.588875	FALSE	Usp33	ubiquitin specific peptidase 33 [Source:MGI Symbol;Acc:MGI:2159711]
ENSMUST00000197748	ENSMUSG00000025437	4.0425	0.94695	4.26897	0.497261	0.747692	FALSE	Usp33	ubiquitin specific peptidase 33 [Source:MGI Symbol;Acc:MGI:2159711]
ENSMUST00000026507	ENSMUSG00000025437	1.00469	1.79385	-1.78547	0.775347	0.900533	FALSE	Usp33	ubiquitin specific peptidase 33 [Source:MGI Symbol;Acc:MGI:2159711]
TCONS_00017406	ENSMUSG00000025437	2.07939	2.88835	-1.38904	0.972577	0.987929	FALSE	Usp33	ubiquitin specific peptidase 33 [Source:MGI Symbol;Acc:MGI:2159711]
ENSMUST00000108075	ENSMUSG00000000804	16.7341	12.089	1.38424	0.148435	0.467763	FALSE	Usp32	ubiquitin specific peptidase 32 [Source:MGI Symbol;Acc:MGI:2144475]
TCONS_00005172	ENSMUSG00000000804	4.83254	1.24041	3.89592	0.269045	0.601417	FALSE	Usp32	ubiquitin specific peptidase 32 [Source:MGI Symbol;Acc:MGI:2144475]
ENSMUST00000046929	ENSMUSG00000063317	13.7281	11.9175	1.15193	0.101868	0.381065	FALSE	Usp31	ubiquitin specific peptidase 31 [Source:MGI Symbol;Acc:MGI:1923429]
TCONS_00020522	ENSMUSG00000029592	0.594282	1.83836	-3.09341	0.28544	0.604301	FALSE	Usp30	ubiquitin specific peptidase 30 [Source:MGI Symbol;Acc:MGI:2140991]
ENSMUST00000200119	ENSMUSG00000029592	2.64459	1.77327	1.49137	0.678159	0.849614	FALSE	Usp30	ubiquitin specific peptidase 30 [Source:MGI Symbol;Acc:MGI:2140991]
ENSMUST00000213874	ENSMUSG00000032267	1.95795	2.46465	-1.25879	0.288947	0.604301	FALSE	Usp28	ubiquitin specific peptidase 28 [Source:MGI Symbol;Acc:MGI:2442293]
TCONS_00027571	ENSMUSG00000032267	1.23021	1.27573	-1.037	0.558455	0.778204	FALSE	Usp28	ubiquitin specific peptidase 28 [Source:MGI Symbol;Acc:MGI:2442293]
ENSMUST00000047349	ENSMUSG00000032267	1.78217	0.713392	2.49816	0.712759	0.869806	FALSE	Usp28	ubiquitin specific peptidase 28 [Source:MGI Symbol;Acc:MGI:2442293]
ENSMUST00000023580	ENSMUSG00000022867	15.2914	13.4751	1.13479	0.0962724	0.370096	FALSE	Usp25	ubiquitin specific peptidase 25 [Source:MGI Symbol;Acc:MGI:1353655]
TCONS_00018544	ENSMUSG00000028514	5.6352	1.72514	3.26652	0.585266	0.794489	FALSE	Usp24	ubiquitin specific peptidase 24 [Source:MGI Symbol;Acc:MGI:1919936]
ENSMUST00000094933	ENSMUSG00000028514	14.5847	14.5125	1.00498	0.99659	0.998048	FALSE	Usp24	ubiquitin specific peptidase 24 [Source:MGI Symbol;Acc:MGI:1919936]
ENSMUST00000041683	ENSMUSG00000042506	16.32	16.6131	-1.01796	0.416203	0.709824	FALSE	Usp22	ubiquitin specific peptidase 22 [Source:MGI Symbol;Acc:MGI:2144157]
TCONS_00001685	ENSMUSG00000053483	11.4922	11.4947	-1.00022	0.853444	0.933774	FALSE	Usp21	ubiquitin specific peptidase 21 [Source:MGI Symbol;Acc:MGI:1353665]
TCONS_00027511	ENSMUSG00000032010	3.22367	0.672712	4.79205	0.149423	0.46891	FALSE	Usp2	ubiquitin specific peptidase 2 [Source:MGI Symbol;Acc:MGI:1858178]
ENSMUST00000034508	ENSMUSG00000032010	1.54953	3.89003	-2.51047	0.258177	0.591076	FALSE	Usp2	ubiquitin specific peptidase 2 [Source:MGI Symbol;Acc:MGI:1858178]
ENSMUST00000176671	ENSMUSG00000032010	1.25791	0.00709367	177.328	0.259151	0.592539	FALSE	Usp2	ubiquitin specific peptidase 2 [Source:MGI Symbol;Acc:MGI:1858178]
ENSMUST00000193678	ENSMUSG00000006676	5.07833	6.09278	-1.19976	0.482108	0.747665	FALSE	Usp19	ubiquitin specific peptidase 19 [Source:MGI Symbol;Acc:MGI:1918722]
ENSMUST00000085044	ENSMUSG00000006676	4.5162	1.81977	2.48174	0.518798	0.752951	FALSE	Usp19	ubiquitin specific peptidase 19 [Source:MGI Symbol;Acc:MGI:1918722]
ENSMUST00000166103	ENSMUSG00000006676	5.85565	5.15527	1.13586	0.653189	0.834681	FALSE	Usp19	ubiquitin specific peptidase 19 [Source:MGI Symbol;Acc:MGI:1918722]
ENSMUST00000178075	ENSMUSG00000006676	11.4938	11.6335	-1.01216	0.792411	0.909558	FALSE	Usp19	ubiquitin specific peptidase 19 [Source:MGI Symbol;Acc:MGI:1918722]
ENSMUST00000006854	ENSMUSG00000006676	5.6846	5.49814	1.03391	0.859114	0.937328	FALSE	Usp19	ubiquitin specific peptidase 19 [Source:MGI Symbol;Acc:MGI:1918722]
ENSMUST00000026710	ENSMUSG00000025616	1.43197	0.488768	2.92974	0.609178	0.807906	FALSE	Usp16	ubiquitin specific peptidase 16 [Source:MGI Symbol;Acc:MGI:1921362]
TCONS_00010473	ENSMUSG00000025616	8.75324	9.56735	-1.09301	0.721466	0.874409	FALSE	Usp16	ubiquitin specific peptidase 16 [Source:MGI Symbol;Acc:MGI:1921362]
TCONS_00012894	ENSMUSG00000047879	12.513	14.0808	-1.1253	0.997139	0.998165	FALSE	Usp14	ubiquitin specific peptidase 14 [Source:MGI Symbol;Acc:MGI:1928898]
ENSMUST00000085614	ENSMUSG00000029640	10.9442	8.68738	1.25978	0.00710974	0.0959844	FALSE	Usp12	ubiquitin specific peptidase 12 [Source:MGI Symbol;Acc:MGI:1270128]
TCONS_00029270	ENSMUSG00000031066	0.451326	0.865078	-1.91675	0.678121	0.849614	FALSE	Usp11	ubiquitin specific peptidase 11 [Source:MGI Symbol;Acc:MGI:2384312]
ENSMUST00000144458	ENSMUSG00000031826	2.92658	4.20805	-1.43787	0.100039	0.376698	FALSE	Usp10	ubiquitin specific peptidase 10 [Source:MGI Symbol;Acc:MGI:894652]
ENSMUST00000108988	ENSMUSG00000031826	4.45513	6.51217	-1.46172	0.25542	0.589059	FALSE	Usp10	ubiquitin specific peptidase 10 [Source:MGI Symbol;Acc:MGI:894652]
TCONS_00018504	ENSMUSG00000028560	9.149	17.1519	-1.87473	0.000350617	0.0402674	TRUE	Usp1	ubiquitin specific peptidase 1 [Source:MGI Symbol;Acc:MGI:2385198]
ENSMUST00000091358	ENSMUSG00000028560	5.87537	7.98939	-1.35981	0.00846973	0.106269	FALSE	Usp1	ubiquitin specific peptidase 1 [Source:MGI Symbol;Acc:MGI:2385198]
TCONS_00014407	ENSMUSG00000069020	3.51963	0.678433	5.18788	0.128073	0.432433	FALSE	Urm1	ubiquitin related modifier 1 [Source:MGI Symbol;Acc:MGI:1915455]
TCONS_00014410	ENSMUSG00000069020	0.999154	5.06726	-5.07155	0.217838	0.553821	FALSE	Urm1	ubiquitin related modifier 1 [Source:MGI Symbol;Acc:MGI:1915455]
ENSMUST00000091142	ENSMUSG00000069020	2.85942	4.00274	-1.39984	0.93661	0.973208	FALSE	Urm1	ubiquitin related modifier 1 [Source:MGI Symbol;Acc:MGI:1915455]
ENSMUST00000005394	ENSMUSG00000005262	6.93318	8.87216	-1.27967	0.218458	0.554629	FALSE	Ufd1	ubiquitin recognition factor in ER-associated degradation 1 [Source:MGI Symbol;Acc:MGI:109353]
ENSMUST00000172013	ENSMUSG00000005262	4.11497	2.0376	2.01951	0.288284	0.604301	FALSE	Ufd1	ubiquitin recognition factor in ER-associated degradation 1 [Source:MGI Symbol;Acc:MGI:109353]
ENSMUST00000049453	ENSMUSG00000039000	26.9995	26.2854	1.02717	0.75708	0.891907	FALSE	Ube3c	ubiquitin protein ligase E3C [Source:MGI Symbol;Acc:MGI:2140998]
ENSMUST00000074002	ENSMUSG00000029577	21.6304	18.9915	1.13895	0.0322539	0.202742	FALSE	Ube3b	ubiquitin protein ligase E3B [Source:MGI Symbol;Acc:MGI:1891295]
ENSMUST00000107537	ENSMUSG00000025326	1.48092	5.23223	-3.5331	0.0781518	0.33155	FALSE	Ube3a	ubiquitin protein ligase E3A [Source:MGI Symbol;Acc:MGI:105098]
ENSMUST00000202207	ENSMUSG00000025326	5.21879	2.5657	2.03406	0.108642	0.395232	FALSE	Ube3a	ubiquitin protein ligase E3A [Source:MGI Symbol;Acc:MGI:105098]
ENSMUST00000200758	ENSMUSG00000025326	7.2742	4.30987	1.6878	0.126987	0.430702	FALSE	Ube3a	ubiquitin protein ligase E3A [Source:MGI Symbol;Acc:MGI:105098]
ENSMUST00000202945	ENSMUSG00000025326	2.88183	2.1742	1.32546	0.897245	0.954744	FALSE	Ube3a	ubiquitin protein ligase E3A [Source:MGI Symbol;Acc:MGI:105098]
ENSMUST00000046404	ENSMUSG00000041712	22.7765	27.242	-1.19606	0.138343	0.450858	FALSE	Ubr7	ubiquitin protein ligase E3 component n-recognin 7 (putative) [Source:MGI Symbol;Acc:MGI:1913872]
ENSMUST00000226414	ENSMUSG00000037487	6.58304	4.88339	1.34805	0.0974066	0.371855	FALSE	Ubr5	ubiquitin protein ligase E3 component n-recognin 5 [Source:MGI Symbol;Acc:MGI:1918040]
ENSMUST00000110336	ENSMUSG00000037487	16.234	16.9391	-1.04343	0.811045	0.916068	FALSE	Ubr5	ubiquitin protein ligase E3 component n-recognin 5 [Source:MGI Symbol;Acc:MGI:1918040]
TCONS_00009540	ENSMUSG00000037487	5.20348	4.25149	1.22392	0.898655	0.954893	FALSE	Ubr5	ubiquitin protein ligase E3 component n-recognin 5 [Source:MGI Symbol;Acc:MGI:1918040]
ENSMUST00000129779	ENSMUSG00000066036	3.21233	1.39222	2.30735	0.0306369	0.197297	TRUE	Ubr4	ubiquitin protein ligase E3 component n-recognin 4 [Source:MGI Symbol;Acc:MGI:1916366]
ENSMUST00000097822	ENSMUSG00000066036	32.7097	16.5895	1.97171	0.120445	0.419615	FALSE	Ubr4	ubiquitin protein ligase E3 component n-recognin 4 [Source:MGI Symbol;Acc:MGI:1916366]
ENSMUST00000165860	ENSMUSG00000066036	0.686085	6.35332	-9.26025	0.206356	0.542227	FALSE	Ubr4	ubiquitin protein ligase E3 component n-recognin 4 [Source:MGI Symbol;Acc:MGI:1916366]
ENSMUST00000129949	ENSMUSG00000066036	5.34488	4.61978	1.15696	0.899449	0.95501	FALSE	Ubr4	ubiquitin protein ligase E3 component n-recognin 4 [Source:MGI Symbol;Acc:MGI:1916366]
TCONS_00014637	ENSMUSG00000044308	9.09666	1.68306	5.40483	0.166989	0.495277	FALSE	Ubr3	ubiquitin protein ligase E3 component n-recognin 3 [Source:MGI Symbol;Acc:MGI:1861100]
ENSMUST00000055758	ENSMUSG00000044308	1.83063	0.0648807	28.2154	0.396463	0.694793	FALSE	Ubr3	ubiquitin protein ligase E3 component n-recognin 3 [Source:MGI Symbol;Acc:MGI:1861100]
TCONS_00014639	ENSMUSG00000044308	7.20918	9.21716	-1.27853	0.461286	0.733722	FALSE	Ubr3	ubiquitin protein ligase E3 component n-recognin 3 [Source:MGI Symbol;Acc:MGI:1861100]
ENSMUST00000152610	ENSMUSG00000044308	1.49632	2.07228	-1.38492	0.867778	0.940876	FALSE	Ubr3	ubiquitin protein ligase E3 component n-recognin 3 [Source:MGI Symbol;Acc:MGI:1861100]
TCONS_00014638	ENSMUSG00000044308	4.19378	4.2719	-1.01863	0.917385	0.964056	FALSE	Ubr3	ubiquitin protein ligase E3 component n-recognin 3 [Source:MGI Symbol;Acc:MGI:1861100]
ENSMUST00000150301	ENSMUSG00000044308	1.49722	2.23691	-1.49404	0.931587	0.970932	FALSE	Ubr3	ubiquitin protein ligase E3 component n-recognin 3 [Source:MGI Symbol;Acc:MGI:1861100]
ENSMUST00000113337	ENSMUSG00000023977	24.3025	18.4967	1.31389	0.0946391	0.366558	FALSE	Ubr2	ubiquitin protein ligase E3 component n-recognin 2 [Source:MGI Symbol;Acc:MGI:1861099]
ENSMUST00000028728	ENSMUSG00000027272	13.0707	10.1098	1.29287	0.0206101	0.162099	FALSE	Ubr1	ubiquitin protein ligase E3 component n-recognin 1 [Source:MGI Symbol;Acc:MGI:1277977]
ENSMUST00000128641	ENSMUSG00000025878	14.2623	17.7762	-1.24638	0.0392459	0.226061	FALSE	Uimc1	ubiquitin interaction motif containing 1 [Source:MGI Symbol;Acc:MGI:103185]
ENSMUST00000033158	ENSMUSG00000030870	19.2792	17.9173	1.07601	0.250946	0.586027	FALSE	Ubfd1	ubiquitin family domain containing 1 [Source:MGI Symbol;Acc:MGI:107301]
ENSMUST00000051053	ENSMUSG00000044949	0.1386	1.05855	-7.63743	0.249011	0.583911	FALSE	Ubtd2	ubiquitin domain containing 2 [Source:MGI Symbol;Acc:MGI:2444752]
ENSMUST00000026170	ENSMUSG00000025171	13.2156	11.3061	1.16888	0.238552	0.575181	FALSE	Ubtd1	ubiquitin domain containing 1 [Source:MGI Symbol;Acc:MGI:2385092]
TCONS_00021258	ENSMUSG00000087601	4.3498	4.40257	-1.01213	0.623464	0.817219	FALSE	Uchl1os	ubiquitin carboxy-terminal hydrolase L1, opposite strand [Source:MGI Symbol;Acc:MGI:5446771]
ENSMUST00000176015	ENSMUSG00000029223	28.8302	13.9306	2.06957	0.0831055	0.34225	FALSE	Uchl1	ubiquitin carboxy-terminal hydrolase L1 [Source:MGI Symbol;Acc:MGI:103149]
ENSMUST00000031131	ENSMUSG00000029223	1.83996	8.7663	-4.76439	0.760313	0.893445	FALSE	Uchl1	ubiquitin carboxy-terminal hydrolase L1 [Source:MGI Symbol;Acc:MGI:103149]
ENSMUST00000190258	ENSMUSG00000018189	1.07485	3.10809	-2.89166	0.00316152	0.0692945	TRUE	Uchl5	ubiquitin carboxyl-terminal esterase L5 [Source:MGI Symbol;Acc:MGI:1914848]
TCONS_00000644	ENSMUSG00000018189	2.74906	7.51688	-2.73435	0.0436413	0.24074	FALSE	Uchl5	ubiquitin carboxyl-terminal esterase L5 [Source:MGI Symbol;Acc:MGI:1914848]
ENSMUST00000189936	ENSMUSG00000018189	2.27146	1.63405	1.39008	0.264188	0.596877	FALSE	Uchl5	ubiquitin carboxyl-terminal esterase L5 [Source:MGI Symbol;Acc:MGI:1914848]
ENSMUST00000002289	ENSMUSG00000022111	10.7411	10.6785	1.00586	0.25666	0.590409	FALSE	Uchl3	ubiquitin carboxyl-terminal esterase L3 (ubiquitin thiolesterase) [Source:MGI Symbol;Acc:MGI:1355274]
TCONS_00021637	ENSMUSG00000008348	34.2785	26.5929	1.28901	0.00247008	0.0621456	FALSE	Ubc	ubiquitin C [Source:MGI Symbol;Acc:MGI:98889]
TCONS_00021629	ENSMUSG00000008348	6.67255	4.07874	1.63593	0.00633254	0.0921762	TRUE	Ubc	ubiquitin C [Source:MGI Symbol;Acc:MGI:98889]
TCONS_00021634	ENSMUSG00000008348	61.7607	46.0177	1.34211	0.00698862	0.0949336	FALSE	Ubc	ubiquitin C [Source:MGI Symbol;Acc:MGI:98889]
TCONS_00021644	ENSMUSG00000008348	2.92758	1.35156	2.16608	0.00832182	0.105299	TRUE	Ubc	ubiquitin C [Source:MGI Symbol;Acc:MGI:98889]
TCONS_00021635	ENSMUSG00000008348	25.3597	16.3139	1.55449	0.0156664	0.139917	TRUE	Ubc	ubiquitin C [Source:MGI Symbol;Acc:MGI:98889]
TCONS_00021628	ENSMUSG00000008348	10.3991	7.7105	1.34869	0.0226205	0.169505	FALSE	Ubc	ubiquitin C [Source:MGI Symbol;Acc:MGI:98889]
TCONS_00021633	ENSMUSG00000008348	57.8893	43.4217	1.33319	0.0562516	0.277202	FALSE	Ubc	ubiquitin C [Source:MGI Symbol;Acc:MGI:98889]
TCONS_00021645	ENSMUSG00000008348	5.11451	5.26852	-1.03011	0.0570763	0.279517	FALSE	Ubc	ubiquitin C [Source:MGI Symbol;Acc:MGI:98889]
TCONS_00021638	ENSMUSG00000008348	6.84559	5.3072	1.28987	0.0619935	0.293012	FALSE	Ubc	ubiquitin C [Source:MGI Symbol;Acc:MGI:98889]
TCONS_00021642	ENSMUSG00000008348	3.15794	2.57595	1.22593	0.0745679	0.323591	FALSE	Ubc	ubiquitin C [Source:MGI Symbol;Acc:MGI:98889]
TCONS_00021630	ENSMUSG00000008348	8.60138	7.44891	1.15472	0.0913477	0.359315	FALSE	Ubc	ubiquitin C [Source:MGI Symbol;Acc:MGI:98889]
TCONS_00021636	ENSMUSG00000008348	33.085	25.5779	1.2935	0.13589	0.446433	FALSE	Ubc	ubiquitin C [Source:MGI Symbol;Acc:MGI:98889]
ENSMUST00000156249	ENSMUSG00000008348	1.27522	7.44048	-5.83468	0.189652	0.526028	FALSE	Ubc	ubiquitin C [Source:MGI Symbol;Acc:MGI:98889]
TCONS_00021627	ENSMUSG00000008348	7.81435	6.44436	1.21259	0.288248	0.604301	FALSE	Ubc	ubiquitin C [Source:MGI Symbol;Acc:MGI:98889]
TCONS_00021632	ENSMUSG00000008348	9.41247	6.08026	1.54804	0.475493	0.742489	FALSE	Ubc	ubiquitin C [Source:MGI Symbol;Acc:MGI:98889]
TCONS_00021631	ENSMUSG00000008348	8.79968	8.2302	1.06919	0.95879	0.982557	FALSE	Ubc	ubiquitin C [Source:MGI Symbol;Acc:MGI:98889]
TCONS_00021639	ENSMUSG00000008348	5.44413	3.26604	1.66689	0.993372	0.996566	FALSE	Ubc	ubiquitin C [Source:MGI Symbol;Acc:MGI:98889]
ENSMUST00000019649	ENSMUSG00000019505	30.8564	23.8934	1.29142	0.249518	0.584583	FALSE	Ubb	ubiquitin B [Source:MGI Symbol;Acc:MGI:98888]
TCONS_00003701	ENSMUSG00000019505	35.7692	21.1654	1.68998	0.284836	0.604301	FALSE	Ubb	ubiquitin B [Source:MGI Symbol;Acc:MGI:98888]
ENSMUST00000136938	ENSMUSG00000019505	4.68682	2.67572	1.75161	0.367774	0.67133	FALSE	Ubb	ubiquitin B [Source:MGI Symbol;Acc:MGI:98888]
TCONS_00003697	ENSMUSG00000019505	74.8076	67.6404	1.10596	0.439087	0.717882	FALSE	Ubb	ubiquitin B [Source:MGI Symbol;Acc:MGI:98888]
TCONS_00003699	ENSMUSG00000019505	32.8697	32.6442	1.00691	0.449177	0.724801	FALSE	Ubb	ubiquitin B [Source:MGI Symbol;Acc:MGI:98888]
TCONS_00003698	ENSMUSG00000019505	47.5665	45.3228	1.04951	0.534951	0.762279	FALSE	Ubb	ubiquitin B [Source:MGI Symbol;Acc:MGI:98888]
TCONS_00003700	ENSMUSG00000019505	33.2808	28.5217	1.16686	0.651337	0.833769	FALSE	Ubb	ubiquitin B [Source:MGI Symbol;Acc:MGI:98888]
ENSMUST00000039803	ENSMUSG00000041765	1.86729	5.26349	-2.81878	0.347946	0.653338	FALSE	Ubac2	ubiquitin associated domain containing 2 [Source:MGI Symbol;Acc:MGI:1916139]
TCONS_00008343	ENSMUSG00000041765	10.7288	7.86633	1.36389	0.837698	0.927	FALSE	Ubac2	ubiquitin associated domain containing 2 [Source:MGI Symbol;Acc:MGI:1916139]
ENSMUST00000123275	ENSMUSG00000036352	2.81651	6.22487	-2.21013	0.128425	0.433171	FALSE	Ubac1	ubiquitin associated domain containing 1 [Source:MGI Symbol;Acc:MGI:1920995]
ENSMUST00000036509	ENSMUSG00000036352	22.4018	21.1327	1.06006	0.557139	0.777222	FALSE	Ubac1	ubiquitin associated domain containing 1 [Source:MGI Symbol;Acc:MGI:1920995]
ENSMUST00000165126	ENSMUSG00000090137	67.7459	77.5518	-1.14474	0.0217895	0.166368	FALSE	Uba52	ubiquitin A-52 residue ribosomal protein fusion product 1 [Source:MGI Symbol;Acc:MGI:98887]
ENSMUST00000129909	ENSMUSG00000090137	8.9156	13.0124	-1.45951	0.170387	0.49954	FALSE	Uba52	ubiquitin A-52 residue ribosomal protein fusion product 1 [Source:MGI Symbol;Acc:MGI:98887]
ENSMUST00000042834	ENSMUSG00000038462	77.1939	95.35	-1.2352	0.310461	0.621222	FALSE	Uqcrfs1	ubiquinol-cytochrome c reductase, Rieske iron-sulfur polypeptide 1 [Source:MGI Symbol;Acc:MGI:1913944]
ENSMUST00000020372	ENSMUSG00000020163	37.3284	46.3925	-1.24282	0.261616	0.594723	FALSE	Uqcr11	ubiquinol-cytochrome c reductase, complex III subunit XI [Source:MGI Symbol;Acc:MGI:1913844]
ENSMUST00000138428	ENSMUSG00000020163	7.66202	3.7922	2.02047	0.817041	0.919229	FALSE	Uqcr11	ubiquinol-cytochrome c reductase, complex III subunit XI [Source:MGI Symbol;Acc:MGI:1913844]
ENSMUST00000058407	ENSMUSG00000059534	268.651	344.696	-1.28306	0.0750157	0.324597	FALSE	Uqcr10	ubiquinol-cytochrome c reductase, complex III subunit X [Source:MGI Symbol;Acc:MGI:1913402]
ENSMUST00000151559	ENSMUSG00000059534	15.3459	14.5177	1.05705	0.504262	0.747692	FALSE	Uqcr10	ubiquinol-cytochrome c reductase, complex III subunit X [Source:MGI Symbol;Acc:MGI:1913402]
TCONS_00004793	ENSMUSG00000044894	1.72943	25.3429	-14.6539	0.089473	0.35579	FALSE	Uqcrq	ubiquinol-cytochrome c reductase, complex III subunit VII [Source:MGI Symbol;Acc:MGI:107807]
ENSMUST00000061326	ENSMUSG00000044894	49.756	28.7176	1.7326	0.162316	0.48878	FALSE	Uqcrq	ubiquinol-cytochrome c reductase, complex III subunit VII [Source:MGI Symbol;Acc:MGI:107807]
TCONS_00004792	ENSMUSG00000044894	26.4451	50.3499	-1.90394	0.708518	0.867383	FALSE	Uqcrq	ubiquinol-cytochrome c reductase, complex III subunit VII [Source:MGI Symbol;Acc:MGI:107807]
ENSMUST00000109021	ENSMUSG00000044894	53.2289	56.7081	-1.06536	0.944981	0.977095	FALSE	Uqcrq	ubiquinol-cytochrome c reductase, complex III subunit VII [Source:MGI Symbol;Acc:MGI:107807]
ENSMUST00000078676	ENSMUSG00000063882	0.223722	3.54805	-15.8592	0.313563	0.623581	FALSE	Uqcrh	ubiquinol-cytochrome c reductase hinge protein [Source:MGI Symbol;Acc:MGI:1913826]
ENSMUST00000134760	ENSMUSG00000063882	2.4627	3.63327	-1.47532	0.391839	0.691771	FALSE	Uqcrh	ubiquinol-cytochrome c reductase hinge protein [Source:MGI Symbol;Acc:MGI:1913826]
ENSMUST00000142468	ENSMUSG00000063882	36.3986	40.0282	-1.09972	0.800952	0.91249	FALSE	Uqcrh	ubiquinol-cytochrome c reductase hinge protein [Source:MGI Symbol;Acc:MGI:1913826]
ENSMUST00000026743	ENSMUSG00000025651	51.2457	63.4505	-1.23816	0.064195	0.298806	FALSE	Uqcrc1	ubiquinol-cytochrome c reductase core protein 1 [Source:MGI Symbol;Acc:MGI:107876]
ENSMUST00000025045	ENSMUSG00000024208	87.6127	103.375	-1.17991	0.0199147	0.159183	FALSE	Uqcc2	ubiquinol-cytochrome c reductase complex assembly factor 2 [Source:MGI Symbol;Acc:MGI:1914517]
ENSMUST00000109636	ENSMUSG00000005882	12.3701	11.6869	1.05845	0.637387	0.824878	FALSE	Uqcc1	ubiquinol-cytochrome c reductase complex assembly factor 1 [Source:MGI Symbol;Acc:MGI:1929472]
TCONS_00007627	ENSMUSG00000021520	1.61576	0.230541	7.00856	0.188849	0.525257	FALSE	Uqcrb	ubiquinol-cytochrome c reductase binding protein [Source:MGI Symbol;Acc:MGI:1914780]
ENSMUST00000021993	ENSMUSG00000021520	59.6422	68.1996	-1.14348	0.190374	0.526929	FALSE	Uqcrb	ubiquinol-cytochrome c reductase binding protein [Source:MGI Symbol;Acc:MGI:1914780]
ENSMUST00000033176	ENSMUSG00000030884	76.1968	85.118	-1.11708	0.134826	0.444785	FALSE	Uqcrc2	ubiquinol cytochrome c reductase core protein 2 [Source:MGI Symbol;Acc:MGI:1914253]
ENSMUST00000008748	ENSMUSG00000008604	29.8085	29.573	1.00796	0.458913	0.731519	FALSE	Ubqln4	ubiquilin 4 [Source:MGI Symbol;Acc:MGI:2150152]
ENSMUST00000076454	ENSMUSG00000005312	30.0988	31.5132	-1.04699	0.243265	0.579135	FALSE	Ubqln1	ubiquilin 1 [Source:MGI Symbol;Acc:MGI:1860276]
ENSMUST00000039127	ENSMUSG00000038538	7.9539	5.66661	1.40364	0.0736377	0.321702	FALSE	Ubn2	ubinuclein 2 [Source:MGI Symbol;Acc:MGI:2444236]
ENSMUST00000229126	ENSMUSG00000039473	12.11	10.3606	1.16885	0.372311	0.674946	FALSE	Ubn1	ubinuclein 1 [Source:MGI Symbol;Acc:MGI:1891307]
ENSMUST00000052449	ENSMUSG00000039473	5.60035	3.01884	1.85513	0.609907	0.808056	FALSE	Ubn1	ubinuclein 1 [Source:MGI Symbol;Acc:MGI:1891307]
ENSMUST00000230703	ENSMUSG00000039473	11.3305	10.3218	1.09772	0.641228	0.827646	FALSE	Ubn1	ubinuclein 1 [Source:MGI Symbol;Acc:MGI:1891307]
ENSMUST00000057676	ENSMUSG00000050628	20.9631	17.7129	1.1835	0.139269	0.452564	FALSE	Ubald2	UBA-like domain containing 2 [Source:MGI Symbol;Acc:MGI:1914635]
ENSMUST00000082456	ENSMUSG00000064390	1.84921	2.84866	-1.54048	0.62219	0.816386	FALSE	Rnu73b	U73B small nuclear RNA [Source:MGI Symbol;Acc:MGI:1321387]
ENSMUST00000055575	ENSMUSG00000050188	8.6681	6.28887	1.37832	0.33989	0.646466	FALSE	Lsm10	U7 snRNP-specific Sm-like protein LSM10 [Source:MGI Symbol;Acc:MGI:2151045]
TCONS_00018696	ENSMUSG00000050188	1.78381	1.59812	1.11619	0.838643	0.92729	FALSE	Lsm10	U7 snRNP-specific Sm-like protein LSM10 [Source:MGI Symbol;Acc:MGI:2151045]
TCONS_00026261	ENSMUSG00000031792	1.2325	1.5611	-1.26661	0.617628	0.813262	FALSE	Usb1	U6 snRNA biogenesis 1 [Source:MGI Symbol;Acc:MGI:2142454]
ENSMUST00000199460	ENSMUSG00000104896	2.1131	4.05938	-1.92106	0.27162	0.601435	FALSE	Rnu3b4	U3B small nuclear RNA 4 [Source:MGI Symbol;Acc:MGI:97988]
ENSMUST00000184171	ENSMUSG00000098641	1.88271	3.66603	-1.94721	0.838939	0.927431	FALSE	Rnu3b4	U3B small nuclear RNA 4 [Source:MGI Symbol;Acc:MGI:97988]
ENSMUST00000196353	ENSMUSG00000105115	1.46766	2.91786	-1.9881	0.231029	0.569357	FALSE	Rnu3b2	U3B small nuclear RNA 2 [Source:MGI Symbol;Acc:MGI:97986]
ENSMUST00000185073	ENSMUSG00000098925	1.00692	1.70087	-1.68919	0.62687	0.818957	FALSE	Rnu3b2	U3B small nuclear RNA 2 [Source:MGI Symbol;Acc:MGI:97986]
ENSMUST00000200547	ENSMUSG00000105025	2.70375	4.69698	-1.73721	0.182476	0.516303	FALSE	Rnu3b1	U3B small nuclear RNA 1 [Source:MGI Symbol;Acc:MGI:97985]
ENSMUST00000083936	ENSMUSG00000065870	1.69963	3.49647	-2.0572	0.188993	0.525449	FALSE	Rnu3a	U3A small nuclear RNA [Source:MGI Symbol;Acc:MGI:97977]
ENSMUST00000027979	ENSMUSG00000026667	38.7963	29.2664	1.32563	0.00223922	0.0592493	FALSE	Uhmk1	U2AF homology motif (UHM) kinase 1 [Source:MGI Symbol;Acc:MGI:1341908]
TCONS_00028726	ENSMUSG00000032407	6.46273	7.72236	-1.19491	0.499582	0.747692	FALSE	U2surp	U2 snRNP-associated SURP domain containing [Source:MGI Symbol;Acc:MGI:1915208]
ENSMUST00000084010	ENSMUSG00000065944	5.69506	7.86158	-1.38042	0.461863	0.734198	FALSE	Rnu2-10	U2 small nuclear RNA 10 [Source:MGI Symbol;Acc:MGI:97976]
ENSMUST00000134091	ENSMUSG00000008333	1.57716	3.68182	-2.33447	0.0440231	0.241959	FALSE	Snrpb2	U2 small nuclear ribonucleoprotein B [Source:MGI Symbol;Acc:MGI:104805]
TCONS_00015071	ENSMUSG00000008333	2.21495	3.43563	-1.55111	0.0567466	0.278804	FALSE	Snrpb2	U2 small nuclear ribonucleoprotein B [Source:MGI Symbol;Acc:MGI:104805]
ENSMUST00000008477	ENSMUSG00000008333	8.04804	8.3578	-1.03849	0.63895	0.825995	FALSE	Snrpb2	U2 small nuclear ribonucleoprotein B [Source:MGI Symbol;Acc:MGI:104805]
ENSMUST00000209099	ENSMUSG00000030435	24.3159	40.7751	-1.67689	0.0556458	0.27528	FALSE	U2af2	U2 small nuclear ribonucleoprotein auxiliary factor (U2AF) 2 [Source:MGI Symbol;Acc:MGI:98886]
TCONS_00023702	ENSMUSG00000030435	22.8091	30.8029	-1.35047	0.129936	0.435612	FALSE	U2af2	U2 small nuclear ribonucleoprotein auxiliary factor (U2AF) 2 [Source:MGI Symbol;Acc:MGI:98886]
ENSMUST00000207498	ENSMUSG00000030435	1.67e-06	1.53636	-921817	0.27699	0.601435	FALSE	U2af2	U2 small nuclear ribonucleoprotein auxiliary factor (U2AF) 2 [Source:MGI Symbol;Acc:MGI:98886]
ENSMUST00000207926	ENSMUSG00000030435	4.08775	8.23251	-2.01395	0.839996	0.927488	FALSE	U2af2	U2 small nuclear ribonucleoprotein auxiliary factor (U2AF) 2 [Source:MGI Symbol;Acc:MGI:98886]
TCONS_00023700	ENSMUSG00000030435	1.22737	2.644	-2.15419	0.858775	0.937082	FALSE	U2af2	U2 small nuclear ribonucleoprotein auxiliary factor (U2AF) 2 [Source:MGI Symbol;Acc:MGI:98886]
TCONS_00023699	ENSMUSG00000030435	3.24748	3.19646	1.01596	0.955498	0.981166	FALSE	U2af2	U2 small nuclear ribonucleoprotein auxiliary factor (U2AF) 2 [Source:MGI Symbol;Acc:MGI:98886]
ENSMUST00000014684	ENSMUSG00000061613	32.652	44.7711	-1.37116	0.00138478	0.0527686	FALSE	U2af1	U2 small nuclear ribonucleoprotein auxiliary factor (U2AF) 1 [Source:MGI Symbol;Acc:MGI:98884]
ENSMUST00000166526	ENSMUSG00000061613	5.27936	6.79157	-1.28644	0.371919	0.674873	FALSE	U2af1	U2 small nuclear ribonucleoprotein auxiliary factor (U2AF) 1 [Source:MGI Symbol;Acc:MGI:98884]
ENSMUST00000071006	ENSMUSG00000024217	23.7076	30.2432	-1.27568	0.797962	0.911311	FALSE	Snrpc	U1 small nuclear ribonucleoprotein C [Source:MGI Symbol;Acc:MGI:109489]
TCONS_00011257	ENSMUSG00000024217	8.42328	12.2788	-1.45773	0.811657	0.91648	FALSE	Snrpc	U1 small nuclear ribonucleoprotein C [Source:MGI Symbol;Acc:MGI:109489]
TCONS_00016282	ENSMUSG00000027300	2.14936	4.24443	-1.97474	0.166526	0.494347	FALSE	Ubox5	U box domain containing 5 [Source:MGI Symbol;Acc:MGI:2154658]
ENSMUST00000159683	ENSMUSG00000022792	9.25818	11.5632	-1.24897	0.26969	0.601435	FALSE	Yars2	tyrosyl-tRNA synthetase 2 (mitochondrial) [Source:MGI Symbol;Acc:MGI:1917370]
ENSMUST00000128287	ENSMUSG00000028811	5.37606	4.38934	1.2248	0.289614	0.604462	FALSE	Yars	tyrosyl-tRNA synthetase [Source:MGI Symbol;Acc:MGI:2147627]
ENSMUST00000106054	ENSMUSG00000028811	19.2464	25.4625	-1.32297	0.57032	0.784879	FALSE	Yars	tyrosyl-tRNA synthetase [Source:MGI Symbol;Acc:MGI:2147627]
TCONS_00018733	ENSMUSG00000028811	5.43367	4.68457	1.15991	0.803857	0.913564	FALSE	Yars	tyrosyl-tRNA synthetase [Source:MGI Symbol;Acc:MGI:2147627]
ENSMUST00000225138	ENSMUSG00000035958	8.63335	12.2542	-1.4194	0.550816	0.773557	FALSE	Tdp2	tyrosyl-DNA phosphodiesterase 2 [Source:MGI Symbol;Acc:MGI:1860486]
ENSMUST00000225490	ENSMUSG00000035958	6.26408	4.61135	1.3584	0.951322	0.980103	FALSE	Tdp2	tyrosyl-DNA phosphodiesterase 2 [Source:MGI Symbol;Acc:MGI:1860486]
TCONS_00006120	ENSMUSG00000021177	0.335293	3.19229	-9.52091	0.106382	0.390791	FALSE	Tdp1	tyrosyl-DNA phosphodiesterase 1 [Source:MGI Symbol;Acc:MGI:1920036]
ENSMUST00000021594	ENSMUSG00000021177	5.90887	5.29026	1.11693	0.379422	0.68109	FALSE	Tdp1	tyrosyl-DNA phosphodiesterase 1 [Source:MGI Symbol;Acc:MGI:1920036]
ENSMUST00000115123	ENSMUSG00000022791	4.43095	7.68586	-1.73459	0.639388	0.826263	FALSE	Tnk2	tyrosine kinase, non-receptor, 2 [Source:MGI Symbol;Acc:MGI:1858308]
ENSMUST00000115124	ENSMUSG00000022791	3.72628	2.00503	1.85846	0.772592	0.899101	FALSE	Tnk2	tyrosine kinase, non-receptor, 2 [Source:MGI Symbol;Acc:MGI:1858308]
ENSMUST00000214454	ENSMUSG00000032175	8.7935	7.44367	1.18134	0.878077	0.945641	FALSE	Tyk2	tyrosine kinase 2 [Source:MGI Symbol;Acc:MGI:1929470]
ENSMUST00000110361	ENSMUSG00000022285	1.45832	3.61425	-2.47837	0.0696621	0.312638	FALSE	Ywhaz	tyrosine 3-monooxygenase/tryptophan 5-monooxygenase activation protein, zeta polypeptide [Source:MGI Symbol;Acc:MGI:109484]
TCONS_00009532	ENSMUSG00000022285	107.609	84.1607	1.27862	0.431304	0.714068	FALSE	Ywhaz	tyrosine 3-monooxygenase/tryptophan 5-monooxygenase activation protein, zeta polypeptide [Source:MGI Symbol;Acc:MGI:109484]
ENSMUST00000126184	ENSMUSG00000022285	0.794307	1.53914	-1.93771	0.444393	0.720846	FALSE	Ywhaz	tyrosine 3-monooxygenase/tryptophan 5-monooxygenase activation protein, zeta polypeptide [Source:MGI Symbol;Acc:MGI:109484]
ENSMUST00000022894	ENSMUSG00000022285	66.1085	87.17	-1.31859	0.560735	0.779555	FALSE	Ywhaz	tyrosine 3-monooxygenase/tryptophan 5-monooxygenase activation protein, zeta polypeptide [Source:MGI Symbol;Acc:MGI:109484]
ENSMUST00000110362	ENSMUSG00000022285	53.4416	66.2075	-1.23888	0.960433	0.983324	FALSE	Ywhaz	tyrosine 3-monooxygenase/tryptophan 5-monooxygenase activation protein, zeta polypeptide [Source:MGI Symbol;Acc:MGI:109484]
TCONS_00021720	ENSMUSG00000051391	9.88917	5.62578	1.75783	0.86163	0.938668	FALSE	Ywhag	tyrosine 3-monooxygenase/tryptophan 5-monooxygenase activation protein, gamma polypeptide [Source:MGI Symbol;Acc:MGI:108109]
ENSMUST00000055808	ENSMUSG00000051391	84.9908	85.1203	-1.00152	0.907244	0.958967	FALSE	Ywhag	tyrosine 3-monooxygenase/tryptophan 5-monooxygenase activation protein, gamma polypeptide [Source:MGI Symbol;Acc:MGI:108109]
ENSMUST00000019109	ENSMUSG00000018965	116.302	83.1129	1.39933	0.00314238	0.0691073	FALSE	Ywhah	tyrosine 3-monooxygenase/tryptophan 5-monooxygenase activation protein, eta polypeptide [Source:MGI Symbol;Acc:MGI:109194]
ENSMUST00000067664	ENSMUSG00000020849	285.132	335.729	-1.17745	0.0154535	0.139123	FALSE	Ywhae	tyrosine 3-monooxygenase/tryptophan 5-monooxygenase activation protein, epsilon polypeptide [Source:MGI Symbol;Acc:MGI:894689]
ENSMUST00000153038	ENSMUSG00000020849	4.9164	2.19223	2.24265	0.0577277	0.280858	FALSE	Ywhae	tyrosine 3-monooxygenase/tryptophan 5-monooxygenase activation protein, epsilon polypeptide [Source:MGI Symbol;Acc:MGI:894689]
ENSMUST00000131288	ENSMUSG00000018326	0.902293	5.43684	-6.02558	0.174357	0.504641	FALSE	Ywhab	tyrosine 3-monooxygenase/tryptophan 5-monooxygenase activation protein, beta polypeptide [Source:MGI Symbol;Acc:MGI:1891917]
ENSMUST00000018470	ENSMUSG00000018326	81.9053	96.6241	-1.1797	0.442087	0.719044	FALSE	Ywhab	tyrosine 3-monooxygenase/tryptophan 5-monooxygenase activation protein, beta polypeptide [Source:MGI Symbol;Acc:MGI:1891917]
ENSMUST00000120944	ENSMUSG00000080902	36.0328	44.4966	-1.23489	0.339864	0.646466	FALSE	Ywhaq-ps3	tyrosine 3-monooxygenase/tryptophan 5-monooxygenase activation protein theta, pseudogene 3 [Source:MGI Symbol;Acc:MGI:3650241]
ENSMUST00000049531	ENSMUSG00000076432	163.556	185.15	-1.13203	0.165194	0.492072	FALSE	Ywhaq	tyrosine 3-monooxygenase/tryptophan 5-monooxygenase activation protein theta [Source:MGI Symbol;Acc:MGI:891963]
ENSMUST00000103002	ENSMUSG00000076432	3.84697	7.71087	-2.0044	0.607405	0.806654	FALSE	Ywhaq	tyrosine 3-monooxygenase/tryptophan 5-monooxygenase activation protein theta [Source:MGI Symbol;Acc:MGI:891963]
ENSMUST00000155480	ENSMUSG00000076432	8.7263	10.3903	-1.19068	0.718406	0.872878	FALSE	Ywhaq	tyrosine 3-monooxygenase/tryptophan 5-monooxygenase activation protein theta [Source:MGI Symbol;Acc:MGI:891963]
TCONS_00006340	ENSMUSG00000076432	17.0209	10.7671	1.58082	0.772024	0.898883	FALSE	Ywhaq	tyrosine 3-monooxygenase/tryptophan 5-monooxygenase activation protein theta [Source:MGI Symbol;Acc:MGI:891963]
ENSMUST00000133932	ENSMUSG00000005994	32.0282	35.2628	-1.10099	0.065005	0.300714	FALSE	Tyrp1	tyrosinase-related protein 1 [Source:MGI Symbol;Acc:MGI:98881]
ENSMUST00000006151	ENSMUSG00000005994	1385.28	1139.28	1.21593	0.0661789	0.303869	FALSE	Tyrp1	tyrosinase-related protein 1 [Source:MGI Symbol;Acc:MGI:98881]
TCONS_00018456	ENSMUSG00000005994	281.75	214.532	1.31333	0.299281	0.611127	FALSE	Tyrp1	tyrosinase-related protein 1 [Source:MGI Symbol;Acc:MGI:98881]
TCONS_00018452	ENSMUSG00000005994	259.6	221.033	1.17449	0.315259	0.625145	FALSE	Tyrp1	tyrosinase-related protein 1 [Source:MGI Symbol;Acc:MGI:98881]
TCONS_00018455	ENSMUSG00000005994	15.5299	17.2069	-1.10799	0.586543	0.795429	FALSE	Tyrp1	tyrosinase-related protein 1 [Source:MGI Symbol;Acc:MGI:98881]
TCONS_00018454	ENSMUSG00000005994	27.5027	20.0959	1.36858	0.769192	0.897664	FALSE	Tyrp1	tyrosinase-related protein 1 [Source:MGI Symbol;Acc:MGI:98881]
ENSMUST00000207164	ENSMUSG00000004651	2.48698	6.53067	-2.62594	0.379579	0.681297	FALSE	Tyr	tyrosinase [Source:MGI Symbol;Acc:MGI:98880]
ENSMUST00000004770	ENSMUSG00000004651	36.386	22.3016	1.63154	0.410874	0.705581	FALSE	Tyr	tyrosinase [Source:MGI Symbol;Acc:MGI:98880]
ENSMUST00000207834	ENSMUSG00000004651	2.64306	1.61304	1.63856	0.418611	0.711342	FALSE	Tyr	tyrosinase [Source:MGI Symbol;Acc:MGI:98880]
TCONS_00025246	ENSMUSG00000004651	8.70413	22.6483	-2.60202	0.428328	0.714068	FALSE	Tyr	tyrosinase [Source:MGI Symbol;Acc:MGI:98880]
TCONS_00021513	ENSMUSG00000032741	14.401	9.53685	1.51004	0.00247815	0.0621771	TRUE	Tpcn1	two pore channel 1 [Source:MGI Symbol;Acc:MGI:2182472]
ENSMUST00000046426	ENSMUSG00000032741	6.20389	4.25877	1.45673	0.0752815	0.325095	FALSE	Tpcn1	two pore channel 1 [Source:MGI Symbol;Acc:MGI:2182472]
ENSMUST00000024906	ENSMUSG00000024098	17.2556	15.7609	1.09484	0.402163	0.699514	FALSE	Twsg1	twisted gastrulation BMP signaling modulator 1 [Source:MGI Symbol;Acc:MGI:2137520]
ENSMUST00000024047	ENSMUSG00000023277	3.97939	6.53979	-1.64342	0.000154502	0.0378904	TRUE	Twf2	twinfilin actin binding protein 2 [Source:MGI Symbol;Acc:MGI:1346078]
ENSMUST00000023087	ENSMUSG00000022451	43.8495	36.4248	1.20384	0.0407296	0.231155	FALSE	Twf1	twinfilin actin binding protein 1 [Source:MGI Symbol;Acc:MGI:1100520]
ENSMUST00000042661	ENSMUSG00000036565	10.5868	6.98221	1.51625	0.000561184	0.0416324	TRUE	Ttyh3	tweety family member 3 [Source:MGI Symbol;Acc:MGI:1925589]
TCONS_00021810	ENSMUSG00000036565	0.712471	2.02882	-2.84759	0.396996	0.695279	FALSE	Ttyh3	tweety family member 3 [Source:MGI Symbol;Acc:MGI:1925589]
ENSMUST00000045779	ENSMUSG00000034714	40.0516	27.2337	1.47067	0.0180727	0.151488	FALSE	Ttyh2	tweety family member 2 [Source:MGI Symbol;Acc:MGI:2157091]
ENSMUST00000177841	ENSMUSG00000045752	0.957578	0.177671	5.38963	0.558587	0.778209	FALSE	Tssc4	tumor-suppressing subchromosomal transferable fragment 4 [Source:MGI Symbol;Acc:MGI:1861712]
ENSMUST00000014546	ENSMUSG00000014402	15.0099	17.6117	-1.17334	0.037696	0.220913	FALSE	Tsg101	tumor susceptibility gene 101 [Source:MGI Symbol;Acc:MGI:106581]
ENSMUST00000209440	ENSMUSG00000039530	14.4683	17.8671	-1.23492	0.270504	0.601435	FALSE	Tusc3	tumor suppressor candidate 3 [Source:MGI Symbol;Acc:MGI:1933134]
ENSMUST00000209970	ENSMUSG00000039530	4.36952	2.37748	1.83788	0.279582	0.602649	FALSE	Tusc3	tumor suppressor candidate 3 [Source:MGI Symbol;Acc:MGI:1933134]
ENSMUST00000010198	ENSMUSG00000010054	17.8751	15.9376	1.12157	0.115887	0.411269	FALSE	Tusc2	tumor suppressor 2, mitochondrial calcium regulator [Source:MGI Symbol;Acc:MGI:1931086]
TCONS_00023325	ENSMUSG00000084319	18.5385	12.343	1.50194	0.0791069	0.333487	FALSE	Tpt1-ps3	tumor protein, translationally-controlled, pseudogene 3 [Source:MGI Symbol;Acc:MGI:2664997]
ENSMUST00000121046	ENSMUSG00000084319	75.8286	66.3678	1.14255	0.55321	0.774554	FALSE	Tpt1-ps3	tumor protein, translationally-controlled, pseudogene 3 [Source:MGI Symbol;Acc:MGI:2664997]
ENSMUST00000154533	ENSMUSG00000060126	15.6426	8.28	1.8892	0.188457	0.524906	FALSE	Tpt1	tumor protein, translationally-controlled 1 [Source:MGI Symbol;Acc:MGI:104890]
ENSMUST00000110894	ENSMUSG00000060126	594.625	521.531	1.14015	0.366877	0.670573	FALSE	Tpt1	tumor protein, translationally-controlled 1 [Source:MGI Symbol;Acc:MGI:104890]
ENSMUST00000150047	ENSMUSG00000060126	7.03852	3.5094	2.00562	0.627456	0.819411	FALSE	Tpt1	tumor protein, translationally-controlled 1 [Source:MGI Symbol;Acc:MGI:104890]
ENSMUST00000133221	ENSMUSG00000085912	4.56958	2.88915	1.58164	0.0548899	0.273854	FALSE	Trp53cor1	tumor protein p53 pathway corepressor 1 [Source:MGI Symbol;Acc:MGI:3801771]
ENSMUST00000129390	ENSMUSG00000000827	3.98365	3.52993	1.12853	0.87468	0.944399	FALSE	Tpd52l2	tumor protein D52-like 2 [Source:MGI Symbol;Acc:MGI:1913564]
ENSMUST00000000844	ENSMUSG00000000827	1.04847	0.878372	1.19366	0.926588	0.968152	FALSE	Tpd52l2	tumor protein D52-like 2 [Source:MGI Symbol;Acc:MGI:1913564]
ENSMUST00000184849	ENSMUSG00000000827	3.17228	3.73933	-1.17875	0.970511	0.987044	FALSE	Tpd52l2	tumor protein D52-like 2 [Source:MGI Symbol;Acc:MGI:1913564]
ENSMUST00000214644	ENSMUSG00000000296	15.7356	12.5187	1.25697	0.741127	0.884028	FALSE	Tpd52l1	tumor protein D52-like 1 [Source:MGI Symbol;Acc:MGI:1298386]
ENSMUST00000213639	ENSMUSG00000000296	3.13907	1.91901	1.63577	0.782634	0.904613	FALSE	Tpd52l1	tumor protein D52-like 1 [Source:MGI Symbol;Acc:MGI:1298386]
ENSMUST00000000305	ENSMUSG00000000296	2.82071	2.95023	-1.04592	0.835556	0.926899	FALSE	Tpd52l1	tumor protein D52-like 1 [Source:MGI Symbol;Acc:MGI:1298386]
ENSMUST00000091354	ENSMUSG00000027506	14.9615	14.8031	1.0107	0.627375	0.819411	FALSE	Tpd52	tumor protein D52 [Source:MGI Symbol;Acc:MGI:107749]
ENSMUST00000120143	ENSMUSG00000027506	6.66094	7.22495	-1.08467	0.918025	0.964431	FALSE	Tpd52	tumor protein D52 [Source:MGI Symbol;Acc:MGI:107749]
ENSMUST00000148159	ENSMUSG00000062210	4.27748	6.8781	-1.60798	0.0342415	0.209504	FALSE	Tnfaip8	tumor necrosis factor, alpha-induced protein 8 [Source:MGI Symbol;Acc:MGI:2147191]
ENSMUST00000128377	ENSMUSG00000062210	2.21207	2.45371	-1.10924	0.187108	0.522967	FALSE	Tnfaip8	tumor necrosis factor, alpha-induced protein 8 [Source:MGI Symbol;Acc:MGI:2147191]
ENSMUST00000109792	ENSMUSG00000021281	0.0619037	2.5858	-41.7714	0.273084	0.601435	FALSE	Tnfaip2	tumor necrosis factor, alpha-induced protein 2 [Source:MGI Symbol;Acc:MGI:104960]
ENSMUST00000102745	ENSMUSG00000021281	5.25392	3.8766	1.35529	0.405547	0.701829	FALSE	Tnfaip2	tumor necrosis factor, alpha-induced protein 2 [Source:MGI Symbol;Acc:MGI:104960]
ENSMUST00000156003	ENSMUSG00000021281	5.37707	2.9517	1.82169	0.784732	0.905582	FALSE	Tnfaip2	tumor necrosis factor, alpha-induced protein 2 [Source:MGI Symbol;Acc:MGI:104960]
ENSMUST00000108277	ENSMUSG00000017615	17.2878	10.3713	1.66689	0.279124	0.602474	FALSE	Tnfaip1	tumor necrosis factor, alpha-induced protein 1 (endothelial) [Source:MGI Symbol;Acc:MGI:104961]
ENSMUST00000017759	ENSMUSG00000017615	24.1776	25.9099	-1.07165	0.496107	0.747692	FALSE	Tnfaip1	tumor necrosis factor, alpha-induced protein 1 (endothelial) [Source:MGI Symbol;Acc:MGI:104961]
ENSMUST00000032491	ENSMUSG00000030341	37.9655	31.9797	1.18718	0.036802	0.217913	FALSE	Tnfrsf1a	tumor necrosis factor receptor superfamily, member 1a [Source:MGI Symbol;Acc:MGI:1314884]
ENSMUST00000131434	ENSMUSG00000030341	3.28422	0.00820133	400.449	0.51636	0.751353	FALSE	Tnfrsf1a	tumor necrosis factor receptor superfamily, member 1a [Source:MGI Symbol;Acc:MGI:1314884]
ENSMUST00000024698	ENSMUSG00000023905	26.2665	40.3329	-1.53552	0.00439855	0.0779175	TRUE	Tnfrsf12a	tumor necrosis factor receptor superfamily, member 12a [Source:MGI Symbol;Acc:MGI:1351484]
ENSMUST00000039490	ENSMUSG00000035678	7.01533	8.79558	-1.25377	0.0123362	0.12501	FALSE	Tnfsf9	tumor necrosis factor (ligand) superfamily, member 9 [Source:MGI Symbol;Acc:MGI:1101058]
TCONS_00020510	ENSMUSG00000029345	2.34102	2.80117	-1.19656	0.52239	0.755372	FALSE	Tfip11	tuftelin interacting protein 11 [Source:MGI Symbol;Acc:MGI:1930075]
ENSMUST00000031288	ENSMUSG00000029345	9.30157	8.80692	1.05617	0.527187	0.758851	FALSE	Tfip11	tuftelin interacting protein 11 [Source:MGI Symbol;Acc:MGI:1930075]
ENSMUST00000006123	ENSMUSG00000005968	3.78957	2.68112	1.41343	0.641429	0.827773	FALSE	Tuft1	tuftelin 1 [Source:MGI Symbol;Acc:MGI:109572]
ENSMUST00000196733	ENSMUSG00000005968	1.31446	0.866862	1.51634	0.988683	0.994432	FALSE	Tuft1	tuftelin 1 [Source:MGI Symbol;Acc:MGI:109572]
ENSMUST00000102929	ENSMUSG00000035517	8.22368	5.97229	1.37697	0.171336	0.500734	FALSE	Tdrd7	tudor domain containing 7 [Source:MGI Symbol;Acc:MGI:2140279]
ENSMUST00000107777	ENSMUSG00000035517	1.99999	0.935421	2.13806	0.453761	0.727868	FALSE	Tdrd7	tudor domain containing 7 [Source:MGI Symbol;Acc:MGI:2140279]
TCONS_00017077	ENSMUSG00000041912	0.52051	1.60554	-3.08455	0.124132	0.426532	FALSE	Tdrkh	tudor and KH domain containing protein [Source:MGI Symbol;Acc:MGI:1919884]
ENSMUST00000045245	ENSMUSG00000041912	0.724836	0.753964	-1.04018	0.597417	0.802127	FALSE	Tdrkh	tudor and KH domain containing protein [Source:MGI Symbol;Acc:MGI:1919884]
ENSMUST00000105998	ENSMUSG00000028776	7.43977	4.7919	1.55257	0.00257265	0.0629387	TRUE	Tinagl1	tubulointerstitial nephritis antigen-like 1 [Source:MGI Symbol;Acc:MGI:2137617]
ENSMUST00000103013	ENSMUSG00000039230	16.9273	7.10531	2.38235	0.00726376	0.0971124	TRUE	Tbcd	tubulin-specific chaperone d [Source:MGI Symbol;Acc:MGI:1919686]
TCONS_00004510	ENSMUSG00000039230	4.05865	10.8225	-2.66653	0.0910055	0.358345	FALSE	Tbcd	tubulin-specific chaperone d [Source:MGI Symbol;Acc:MGI:1919686]
ENSMUST00000040434	ENSMUSG00000036430	16.8456	19.8797	-1.18011	0.571812	0.785629	FALSE	Tbcc	tubulin-specific chaperone C [Source:MGI Symbol;Acc:MGI:1919976]
ENSMUST00000032627	ENSMUSG00000033790	2.00005	0.620687	3.22232	0.184435	0.51918	FALSE	Tubgcp5	tubulin, gamma complex associated protein 5 [Source:MGI Symbol;Acc:MGI:2178836]
ENSMUST00000206789	ENSMUSG00000033790	0.979189	2.27346	-2.32178	0.751905	0.889129	FALSE	Tubgcp5	tubulin, gamma complex associated protein 5 [Source:MGI Symbol;Acc:MGI:2178836]
ENSMUST00000168657	ENSMUSG00000000759	3.39701	0.58081	5.84874	0.233281	0.57091	FALSE	Tubgcp3	tubulin, gamma complex associated protein 3 [Source:MGI Symbol;Acc:MGI:2183752]
ENSMUST00000164774	ENSMUSG00000000759	2.00034	4.56127	-2.28024	0.318368	0.628314	FALSE	Tubgcp3	tubulin, gamma complex associated protein 3 [Source:MGI Symbol;Acc:MGI:2183752]
ENSMUST00000000776	ENSMUSG00000000759	3.12871	5.11147	-1.63373	0.763052	0.894333	FALSE	Tubgcp3	tubulin, gamma complex associated protein 3 [Source:MGI Symbol;Acc:MGI:2183752]
ENSMUST00000211638	ENSMUSG00000025474	8.36269	11.4081	-1.36416	0.00526791	0.0852241	FALSE	Tubgcp2	tubulin, gamma complex associated protein 2 [Source:MGI Symbol;Acc:MGI:1921487]
TCONS_00004197	ENSMUSG00000035198	11.6992	17.149	-1.46582	0.00892035	0.108414	FALSE	Tubg1	tubulin, gamma 1 [Source:MGI Symbol;Acc:MGI:101834]
ENSMUST00000043680	ENSMUSG00000035198	11.7687	14.2364	-1.20969	0.0324678	0.203932	FALSE	Tubg1	tubulin, gamma 1 [Source:MGI Symbol;Acc:MGI:101834]
ENSMUST00000001513	ENSMUSG00000001473	13.6774	21.2921	-1.55674	0.0126154	0.126215	TRUE	Tubb6	tubulin, beta 6 class V [Source:MGI Symbol;Acc:MGI:1915201]
ENSMUST00000001566	ENSMUSG00000001525	232.099	276.807	-1.19262	0.00371359	0.0747077	FALSE	Tubb5	tubulin, beta 5 class I [Source:MGI Symbol;Acc:MGI:107812]
ENSMUST00000179460	ENSMUSG00000095159	4.89643	6.84632	-1.39823	0.00156803	0.0534264	FALSE	Tubb4b-ps1	tubulin, beta 4B class IVB, pseudogene 1 [Source:MGI Symbol;Acc:MGI:3642800]
ENSMUST00000043584	ENSMUSG00000036752	116.995	164.169	-1.40321	0.00857072	0.107208	FALSE	Tubb4b	tubulin, beta 4B class IVB [Source:MGI Symbol;Acc:MGI:1915472]
ENSMUST00000071134	ENSMUSG00000062380	77.5389	61.9608	1.25142	0.109915	0.39846	FALSE	Tubb3	tubulin, beta 3 class III [Source:MGI Symbol;Acc:MGI:107813]
ENSMUST00000056427	ENSMUSG00000058672	7.65743	3.92544	1.95072	0.000455497	0.0416324	TRUE	Tubb2a	tubulin, beta 2A class IIA [Source:MGI Symbol;Acc:MGI:107861]
TCONS_00001266	ENSMUSG00000026202	4.54374	5.7699	-1.26986	0.164324	0.491381	FALSE	Tuba4a	tubulin, alpha 4A [Source:MGI Symbol;Acc:MGI:1095410]
ENSMUST00000058914	ENSMUSG00000043091	121.516	161.631	-1.33012	0.0418827	0.235038	FALSE	Tuba1c	tubulin, alpha 1C [Source:MGI Symbol;Acc:MGI:1095409]
ENSMUST00000077577	ENSMUSG00000023004	102.78	170.267	-1.65661	0.000264932	0.0380874	TRUE	Tuba1b	tubulin, alpha 1B [Source:MGI Symbol;Acc:MGI:107804]
TCONS_00009963	ENSMUSG00000072235	21.666	25.3733	-1.17111	0.0283313	0.189924	FALSE	Tuba1a	tubulin, alpha 1A [Source:MGI Symbol;Acc:MGI:98869]
TCONS_00009957	ENSMUSG00000072235	126.439	196.883	-1.55714	0.028383	0.19017	TRUE	Tuba1a	tubulin, alpha 1A [Source:MGI Symbol;Acc:MGI:98869]
TCONS_00009958	ENSMUSG00000072235	21.5062	37.4982	-1.7436	0.0878708	0.352635	FALSE	Tuba1a	tubulin, alpha 1A [Source:MGI Symbol;Acc:MGI:98869]
TCONS_00009955	ENSMUSG00000072235	9.14912	2.25766	4.05249	0.129473	0.435207	FALSE	Tuba1a	tubulin, alpha 1A [Source:MGI Symbol;Acc:MGI:98869]
TCONS_00009962	ENSMUSG00000072235	30.4809	20.2153	1.50781	0.541858	0.767317	FALSE	Tuba1a	tubulin, alpha 1A [Source:MGI Symbol;Acc:MGI:98869]
ENSMUST00000097014	ENSMUSG00000072235	186.738	132.343	1.41102	0.671118	0.845139	FALSE	Tuba1a	tubulin, alpha 1A [Source:MGI Symbol;Acc:MGI:98869]
TCONS_00009960	ENSMUSG00000072235	10.2476	9.41087	1.08891	0.683524	0.852361	FALSE	Tuba1a	tubulin, alpha 1A [Source:MGI Symbol;Acc:MGI:98869]
TCONS_00009956	ENSMUSG00000072235	39.897	81.1822	-2.03479	0.868443	0.941112	FALSE	Tuba1a	tubulin, alpha 1A [Source:MGI Symbol;Acc:MGI:98869]
TCONS_00009961	ENSMUSG00000072235	13.9295	5.27826	2.63903	0.964859	0.984503	FALSE	Tuba1a	tubulin, alpha 1A [Source:MGI Symbol;Acc:MGI:98869]
ENSMUST00000037942	ENSMUSG00000036745	2.60874	0.742801	3.51203	0.00676073	0.094513	TRUE	Ttll7	tubulin tyrosine ligase-like family, member 7 [Source:MGI Symbol;Acc:MGI:1918142]
TCONS_00006085	ENSMUSG00000012609	2.15103	2.00631	1.07213	0.652168	0.834185	FALSE	Ttll5	tubulin tyrosine ligase-like family, member 5 [Source:MGI Symbol;Acc:MGI:2443657]
TCONS_00000324	ENSMUSG00000033257	0.00634933	1.35565	-213.511	0.288708	0.604301	FALSE	Ttll4	tubulin tyrosine ligase-like family, member 4 [Source:MGI Symbol;Acc:MGI:1914784]
ENSMUST00000128891	ENSMUSG00000033257	1.55997	3.53986	-2.26918	0.323526	0.632488	FALSE	Ttll4	tubulin tyrosine ligase-like family, member 4 [Source:MGI Symbol;Acc:MGI:1914784]
TCONS_00000323	ENSMUSG00000033257	2.60841	1.74277	1.49671	0.609249	0.807935	FALSE	Ttll4	tubulin tyrosine ligase-like family, member 4 [Source:MGI Symbol;Acc:MGI:1914784]
ENSMUST00000042125	ENSMUSG00000033257	5.85072	5.16681	1.13237	0.949057	0.978782	FALSE	Ttll4	tubulin tyrosine ligase-like family, member 4 [Source:MGI Symbol;Acc:MGI:1914784]
TCONS_00022505	ENSMUSG00000030276	0.0142587	9.7433	-683.324	0.202739	0.539521	FALSE	Ttll3	tubulin tyrosine ligase-like family, member 3 [Source:MGI Symbol;Acc:MGI:2141418]
ENSMUST00000016901	ENSMUSG00000016757	10.4327	12.9205	-1.23846	0.471875	0.740206	FALSE	Ttll12	tubulin tyrosine ligase-like family, member 12 [Source:MGI Symbol;Acc:MGI:3039573]
ENSMUST00000016897	ENSMUSG00000022442	9.23438	7.42895	1.24303	0.0492301	0.258712	FALSE	Ttll1	tubulin tyrosine ligase-like 1 [Source:MGI Symbol;Acc:MGI:2443047]
ENSMUST00000014990	ENSMUSG00000014846	2.29283	0.297945	7.69547	0.00527176	0.0852241	TRUE	Tppp3	tubulin polymerization-promoting protein family member 3 [Source:MGI Symbol;Acc:MGI:1915221]
ENSMUST00000020552	ENSMUSG00000020308	19.6677	17.7687	1.10687	0.297161	0.609581	FALSE	Tpgs1	tubulin polyglutamylase complex subunit 1 [Source:MGI Symbol;Acc:MGI:106618]
TCONS_00028372	ENSMUSG00000037287	1.80398	0.186966	9.64873	0.362675	0.667379	FALSE	Tbcel	tubulin folding cofactor E-like [Source:MGI Symbol;Acc:MGI:1925543]
ENSMUST00000066148	ENSMUSG00000037287	8.06212	4.52956	1.77989	0.897756	0.954775	FALSE	Tbcel	tubulin folding cofactor E-like [Source:MGI Symbol;Acc:MGI:1925543]
ENSMUST00000024930	ENSMUSG00000024118	0.511953	1.98407	-3.87548	0.143167	0.459283	FALSE	Tedc2	tubulin epsilon and delta complex 2 [Source:MGI Symbol;Acc:MGI:1919266]
ENSMUST00000124557	ENSMUSG00000024118	2.87925	2.71449	1.0607	0.444038	0.720729	FALSE	Tedc2	tubulin epsilon and delta complex 2 [Source:MGI Symbol;Acc:MGI:1919266]
ENSMUST00000049271	ENSMUSG00000037466	3.21429	4.99992	-1.55553	0.00982694	0.111927	TRUE	Tedc1	tubulin epsilon and delta complex 1 [Source:MGI Symbol;Acc:MGI:2144738]
ENSMUST00000196755	ENSMUSG00000037466	5.66605	7.69029	-1.35726	0.015677	0.139917	FALSE	Tedc1	tubulin epsilon and delta complex 1 [Source:MGI Symbol;Acc:MGI:2144738]
ENSMUST00000196505	ENSMUSG00000037466	0.733062	2.21141	-3.01668	0.423324	0.714068	FALSE	Tedc1	tubulin epsilon and delta complex 1 [Source:MGI Symbol;Acc:MGI:2144738]
ENSMUST00000046644	ENSMUSG00000042043	80.34	91.7185	-1.14163	0.0603067	0.288586	FALSE	Tbca	tubulin cofactor A [Source:MGI Symbol;Acc:MGI:107549]
ENSMUST00000220561	ENSMUSG00000042043	8.75133	13.9965	-1.59936	0.246365	0.581237	FALSE	Tbca	tubulin cofactor A [Source:MGI Symbol;Acc:MGI:107549]
ENSMUST00000227607	ENSMUSG00000002496	8.42191	6.68497	1.25983	0.223268	0.55954	FALSE	Tsc2	tuberous sclerosis 2 [Source:MGI Symbol;Acc:MGI:102548]
ENSMUST00000228412	ENSMUSG00000002496	1.55541	0.771088	2.01716	0.628311	0.820238	FALSE	Tsc2	tuberous sclerosis 2 [Source:MGI Symbol;Acc:MGI:102548]
TCONS_00014390	ENSMUSG00000026812	4.56414	3.54456	1.28765	0.388692	0.689081	FALSE	Tsc1	tuberous sclerosis 1 [Source:MGI Symbol;Acc:MGI:1929183]
TCONS_00014389	ENSMUSG00000026812	4.36572	3.93877	1.1084	0.911813	0.961044	FALSE	Tsc1	tuberous sclerosis 1 [Source:MGI Symbol;Acc:MGI:1929183]
ENSMUST00000001562	ENSMUSG00000001521	74.4891	72.2655	1.03077	0.793848	0.909944	FALSE	Tulp3	tubby-like protein 3 [Source:MGI Symbol;Acc:MGI:1329045]
TCONS_00011038	ENSMUSG00000034377	2.95208	0.151263	19.5162	0.204493	0.540815	FALSE	Tulp4	tubby like protein 4 [Source:MGI Symbol;Acc:MGI:1916092]
TCONS_00011033	ENSMUSG00000034377	2.70523	0.686486	3.94069	0.272292	0.601435	FALSE	Tulp4	tubby like protein 4 [Source:MGI Symbol;Acc:MGI:1916092]
ENSMUST00000146758	ENSMUSG00000034377	0.140122	1.14093	-8.14236	0.331346	0.640538	FALSE	Tulp4	tubby like protein 4 [Source:MGI Symbol;Acc:MGI:1916092]
ENSMUST00000039655	ENSMUSG00000034377	9.89628	8.77543	1.12773	0.347963	0.653338	FALSE	Tulp4	tubby like protein 4 [Source:MGI Symbol;Acc:MGI:1916092]
TCONS_00011032	ENSMUSG00000034377	5.27546	5.6789	-1.07647	0.408799	0.703801	FALSE	Tulp4	tubby like protein 4 [Source:MGI Symbol;Acc:MGI:1916092]
TCONS_00011031	ENSMUSG00000034377	2.12588	0.897621	2.36835	0.962692	0.984206	FALSE	Tulp4	tubby like protein 4 [Source:MGI Symbol;Acc:MGI:1916092]
TCONS_00024456	ENSMUSG00000073838	18.0802	25.7046	-1.4217	0.132226	0.440455	FALSE	Tufm	Tu translation elongation factor, mitochondrial [Source:MGI Symbol;Acc:MGI:1923686]
ENSMUST00000106392	ENSMUSG00000073838	21.2003	27.1389	-1.28012	0.292746	0.605916	FALSE	Tufm	Tu translation elongation factor, mitochondrial [Source:MGI Symbol;Acc:MGI:1923686]
ENSMUST00000098048	ENSMUSG00000073838	2.00018	1.91387	1.0451	0.62519	0.818369	FALSE	Tufm	Tu translation elongation factor, mitochondrial [Source:MGI Symbol;Acc:MGI:1923686]
ENSMUST00000070326	ENSMUSG00000038379	3.2673	7.82539	-2.39506	0.12241	0.42343	FALSE	Ttk	Ttk protein kinase [Source:MGI Symbol;Acc:MGI:1194921]
ENSMUST00000188445	ENSMUSG00000038379	2.01758	0.655372	3.07853	0.551249	0.773704	FALSE	Ttk	Ttk protein kinase [Source:MGI Symbol;Acc:MGI:1194921]
ENSMUST00000063574	ENSMUSG00000015126	7.34211	8.21449	-1.11882	0.931957	0.971002	FALSE	Tsr3	TSR3 20S rRNA accumulation [Source:MGI Symbol;Acc:MGI:1915577]
ENSMUST00000045807	ENSMUSG00000038335	7.09522	8.45447	-1.19157	0.0519857	0.265938	FALSE	Tsr1	TSR1 20S rRNA accumulation [Source:MGI Symbol;Acc:MGI:2144566]
ENSMUST00000100539	ENSMUSG00000029723	17.588	16.7456	1.05031	0.906697	0.958931	FALSE	Tsc22d4	TSC22 domain family, member 4 [Source:MGI Symbol;Acc:MGI:1926079]
ENSMUST00000055738	ENSMUSG00000031431	12.5339	3.18897	3.93039	0.0122006	0.124244	TRUE	Tsc22d3	TSC22 domain family, member 3 [Source:MGI Symbol;Acc:MGI:1196284]
ENSMUST00000199164	ENSMUSG00000027806	7.84123	8.42071	-1.0739	0.982647	0.992232	FALSE	Tsc22d2	TSC22 domain family, member 2 [Source:MGI Symbol;Acc:MGI:1919283]
ENSMUST00000022587	ENSMUSG00000022010	32.4471	29.5025	1.09981	0.460607	0.733441	FALSE	Tsc22d1	TSC22 domain family, member 1 [Source:MGI Symbol;Acc:MGI:109127]
ENSMUST00000040560	ENSMUSG00000040521	4.78723	16.7784	-3.50483	0.00545968	0.0867037	TRUE	Tsfm	Ts translation elongation factor, mitochondrial [Source:MGI Symbol;Acc:MGI:1913649]
TCONS_00003195	ENSMUSG00000040521	6.39803	0.689651	9.27719	0.0391509	0.225917	FALSE	Tsfm	Ts translation elongation factor, mitochondrial [Source:MGI Symbol;Acc:MGI:1913649]
TCONS_00006684	ENSMUSG00000021266	16.6392	20.0412	-1.20445	0.120097	0.418934	FALSE	Wars	tryptophanyl-tRNA synthetase [Source:MGI Symbol;Acc:MGI:104630]
ENSMUST00000161410	ENSMUSG00000021266	0.904341	1.66467	-1.84075	0.22853	0.566717	FALSE	Wars	tryptophanyl-tRNA synthetase [Source:MGI Symbol;Acc:MGI:104630]
ENSMUST00000023913	ENSMUSG00000023147	21.7307	22.7369	-1.0463	0.604429	0.805353	FALSE	Wrb	tryptophan rich basic protein [Source:MGI Symbol;Acc:MGI:2136882]
ENSMUST00000020284	ENSMUSG00000020087	17.5894	19.2839	-1.09633	0.53892	0.765492	FALSE	Tysnd1	trypsin domain containing 1 [Source:MGI Symbol;Acc:MGI:1919017]
ENSMUST00000177467	ENSMUSG00000039826	6.23841	7.91687	-1.26905	0.12216	0.423095	FALSE	Trub2	TruB pseudouridine (psi) synthase family member 2 [Source:MGI Symbol;Acc:MGI:2442186]
ENSMUST00000156846	ENSMUSG00000039826	8.59911	9.76061	-1.13507	0.306734	0.618605	FALSE	Trub2	TruB pseudouridine (psi) synthase family member 2 [Source:MGI Symbol;Acc:MGI:2442186]
ENSMUST00000045054	ENSMUSG00000036667	4.3747	2.04865	2.13541	0.00684163	0.0949336	TRUE	Tcaf1	TRPM8 channel-associated factor 1 [Source:MGI Symbol;Acc:MGI:1914665]
ENSMUST00000039913	ENSMUSG00000038028	11.4997	9.70107	1.18541	0.0225652	0.169259	FALSE	Tigar	Trp53 induced glycolysis repulatory phosphatase [Source:MGI Symbol;Acc:MGI:2442752]
ENSMUST00000003575	ENSMUSG00000031799	84.6379	89.5827	-1.05842	0.0569679	0.279317	FALSE	Tpm4	tropomyosin 4 [Source:MGI Symbol;Acc:MGI:2449202]
TCONS_00017043	ENSMUSG00000027940	18.2002	24.3242	-1.33648	0.026669	0.184386	FALSE	Tpm3	tropomyosin 3, gamma [Source:MGI Symbol;Acc:MGI:1890149]
ENSMUST00000029549	ENSMUSG00000027940	12.121	13.5436	-1.11737	0.456025	0.729799	FALSE	Tpm3	tropomyosin 3, gamma [Source:MGI Symbol;Acc:MGI:1890149]
ENSMUST00000147430	ENSMUSG00000027940	3.68532	5.97042	-1.62005	0.526811	0.758433	FALSE	Tpm3	tropomyosin 3, gamma [Source:MGI Symbol;Acc:MGI:1890149]
TCONS_00017042	ENSMUSG00000027940	60.4588	59.4953	1.0162	0.537221	0.764131	FALSE	Tpm3	tropomyosin 3, gamma [Source:MGI Symbol;Acc:MGI:1890149]
ENSMUST00000113707	ENSMUSG00000032366	21.8205	33.0221	-1.51335	0.00639583	0.092541	TRUE	Tpm1	tropomyosin 1, alpha [Source:MGI Symbol;Acc:MGI:98809]
ENSMUST00000129466	ENSMUSG00000032366	2.2903	3.86535	-1.68771	0.0558452	0.275857	FALSE	Tpm1	tropomyosin 1, alpha [Source:MGI Symbol;Acc:MGI:98809]
ENSMUST00000113697	ENSMUSG00000032366	8.3736	12.9293	-1.54406	0.253542	0.588097	FALSE	Tpm1	tropomyosin 1, alpha [Source:MGI Symbol;Acc:MGI:98809]
ENSMUST00000113705	ENSMUSG00000032366	2.30642	4.32027	-1.87315	0.284361	0.604301	FALSE	Tpm1	tropomyosin 1, alpha [Source:MGI Symbol;Acc:MGI:98809]
ENSMUST00000113701	ENSMUSG00000032366	0.379332	1.73452	-4.57257	0.338721	0.646365	FALSE	Tpm1	tropomyosin 1, alpha [Source:MGI Symbol;Acc:MGI:98809]
ENSMUST00000131279	ENSMUSG00000032366	3.76692	3.18116	1.18413	0.674043	0.846941	FALSE	Tpm1	tropomyosin 1, alpha [Source:MGI Symbol;Acc:MGI:98809]
ENSMUST00000113690	ENSMUSG00000032366	2.8186	2.38193	1.18333	0.796794	0.910844	FALSE	Tpm1	tropomyosin 1, alpha [Source:MGI Symbol;Acc:MGI:98809]
ENSMUST00000113695	ENSMUSG00000032366	5.65709	5.61955	1.00668	0.897204	0.954744	FALSE	Tpm1	tropomyosin 1, alpha [Source:MGI Symbol;Acc:MGI:98809]
ENSMUST00000113696	ENSMUSG00000032366	2.45379	5.21271	-2.12435	0.920628	0.965724	FALSE	Tpm1	tropomyosin 1, alpha [Source:MGI Symbol;Acc:MGI:98809]
ENSMUST00000072232	ENSMUSG00000058587	29.2202	22.8064	1.28123	0.0114826	0.120853	FALSE	Tmod3	tropomodulin 3 [Source:MGI Symbol;Acc:MGI:1355315]
ENSMUST00000107773	ENSMUSG00000028328	39.166	19.0521	2.05573	0.00470842	0.0805361	TRUE	Tmod1	tropomodulin 1 [Source:MGI Symbol;Acc:MGI:98775]
ENSMUST00000230054	ENSMUSG00000032783	0.565638	2.00375	-3.54246	0.199501	0.536866	FALSE	Troap	trophinin associated protein [Source:MGI Symbol;Acc:MGI:1925983]
ENSMUST00000229740	ENSMUSG00000032783	1.73903	3.76398	-2.16441	0.251933	0.586865	FALSE	Troap	trophinin associated protein [Source:MGI Symbol;Acc:MGI:1925983]
ENSMUST00000039665	ENSMUSG00000032783	2.53635	2.7588	-1.08771	0.582102	0.792698	FALSE	Troap	trophinin associated protein [Source:MGI Symbol;Acc:MGI:1925983]
ENSMUST00000162663	ENSMUSG00000048495	2.46318	2.02793	1.21463	0.704362	0.865336	FALSE	Tyw5	tRNA-yW synthesizing protein 5 [Source:MGI Symbol;Acc:MGI:1915986]
TCONS_00023662	ENSMUSG00000035585	0.998502	4.1608	-4.16704	0.046907	0.251414	FALSE	Tsen34	tRNA splicing endonuclease subunit 34 [Source:MGI Symbol;Acc:MGI:1913328]
TCONS_00023660	ENSMUSG00000035585	2.88881	9.30597	-3.22139	0.0968037	0.370866	FALSE	Tsen34	tRNA splicing endonuclease subunit 34 [Source:MGI Symbol;Acc:MGI:1913328]
ENSMUST00000108627	ENSMUSG00000035585	4.6834	8.5999	-1.83625	0.187252	0.523103	FALSE	Tsen34	tRNA splicing endonuclease subunit 34 [Source:MGI Symbol;Acc:MGI:1913328]
ENSMUST00000137204	ENSMUSG00000035585	6.3425	0.00562867	1126.82	0.232231	0.57	FALSE	Tsen34	tRNA splicing endonuclease subunit 34 [Source:MGI Symbol;Acc:MGI:1913328]
ENSMUST00000205287	ENSMUSG00000035585	8.60367	4.76435	1.80584	0.370179	0.673385	FALSE	Tsen34	tRNA splicing endonuclease subunit 34 [Source:MGI Symbol;Acc:MGI:1913328]
ENSMUST00000108630	ENSMUSG00000035585	4.31954	4.85721	-1.12448	0.812456	0.916942	FALSE	Tsen34	tRNA splicing endonuclease subunit 34 [Source:MGI Symbol;Acc:MGI:1913328]
TCONS_00023663	ENSMUSG00000035585	1.76391	5.98047	-3.39047	0.88089	0.946966	FALSE	Tsen34	tRNA splicing endonuclease subunit 34 [Source:MGI Symbol;Acc:MGI:1913328]
ENSMUST00000123088	ENSMUSG00000035585	5.03736	7.0879	-1.40707	0.912316	0.961212	FALSE	Tsen34	tRNA splicing endonuclease subunit 34 [Source:MGI Symbol;Acc:MGI:1913328]
ENSMUST00000015124	ENSMUSG00000014980	6.71887	10.3061	-1.5339	0.0258106	0.181479	TRUE	Tsen15	tRNA splicing endonuclease subunit 15 [Source:MGI Symbol;Acc:MGI:1913887]
ENSMUST00000161717	ENSMUSG00000014980	6.75354	10.0213	-1.48385	0.141077	0.455335	FALSE	Tsen15	tRNA splicing endonuclease subunit 15 [Source:MGI Symbol;Acc:MGI:1913887]
ENSMUST00000147652	ENSMUSG00000028898	1.87943	1.9906	-1.05915	0.574023	0.787099	FALSE	Trnau1ap	tRNA selenocysteine 1 associated protein 1 [Source:MGI Symbol;Acc:MGI:1919037]
ENSMUST00000030730	ENSMUSG00000028898	3.53886	3.67705	-1.03905	0.996889	0.998158	FALSE	Trnau1ap	tRNA selenocysteine 1 associated protein 1 [Source:MGI Symbol;Acc:MGI:1919037]
ENSMUST00000113249	ENSMUSG00000013736	0.220964	0.922242	-4.17373	0.297616	0.609911	FALSE	Trnt1	tRNA nucleotidyl transferase, CCA-adding, 1 [Source:MGI Symbol;Acc:MGI:1917297]
TCONS_00022460	ENSMUSG00000013736	6.87001	6.77994	1.01328	0.498861	0.747692	FALSE	Trnt1	tRNA nucleotidyl transferase, CCA-adding, 1 [Source:MGI Symbol;Acc:MGI:1917297]
TCONS_00022459	ENSMUSG00000013736	6.71104	8.02859	-1.19633	0.509747	0.747692	FALSE	Trnt1	tRNA nucleotidyl transferase, CCA-adding, 1 [Source:MGI Symbol;Acc:MGI:1917297]
TCONS_00022458	ENSMUSG00000013736	3.69102	2.69787	1.36812	0.86868	0.941308	FALSE	Trnt1	tRNA nucleotidyl transferase, CCA-adding, 1 [Source:MGI Symbol;Acc:MGI:1917297]
ENSMUST00000039554	ENSMUSG00000037376	8.1257	11.2969	-1.39027	0.082735	0.341723	FALSE	Trmt6	tRNA methyltransferase 6 [Source:MGI Symbol;Acc:MGI:1914176]
ENSMUST00000147336	ENSMUSG00000037376	3.61519	3.6952	-1.02213	0.425534	0.714068	FALSE	Trmt6	tRNA methyltransferase 6 [Source:MGI Symbol;Acc:MGI:1914176]
ENSMUST00000117987	ENSMUSG00000070572	7.29755	8.70221	-1.19248	0.557749	0.777547	FALSE	Trmt112-ps2	tRNA methyltransferase 11-2, pseudogene 2 [Source:MGI Symbol;Acc:MGI:3651720]
ENSMUST00000040321	ENSMUSG00000004127	2.31427	4.10835	-1.77523	0.230952	0.569357	FALSE	Trmt10a	tRNA methyltransferase 10A [Source:MGI Symbol;Acc:MGI:1920421]
ENSMUST00000189655	ENSMUSG00000053286	4.51062	7.03027	-1.55861	3.58e-05	0.024655	TRUE	Trmt1l	tRNA methyltransferase 1 like [Source:MGI Symbol;Acc:MGI:1916185]
ENSMUST00000065625	ENSMUSG00000053286	3.26344	0.61961	5.26693	0.00158047	0.0534264	TRUE	Trmt1l	tRNA methyltransferase 1 like [Source:MGI Symbol;Acc:MGI:1916185]
ENSMUST00000109767	ENSMUSG00000001909	2.05195	1.13786	1.80334	0.274352	0.601435	FALSE	Trmt1	tRNA methyltransferase 1 [Source:MGI Symbol;Acc:MGI:1289155]
ENSMUST00000152301	ENSMUSG00000001909	1.08203	1.20241	-1.11125	0.50656	0.747692	FALSE	Trmt1	tRNA methyltransferase 1 [Source:MGI Symbol;Acc:MGI:1289155]
ENSMUST00000109768	ENSMUSG00000001909	3.40343	6.08493	-1.78788	0.576897	0.788946	FALSE	Trmt1	tRNA methyltransferase 1 [Source:MGI Symbol;Acc:MGI:1289155]
ENSMUST00000137953	ENSMUSG00000001909	2.08752	2.40862	-1.15382	0.702867	0.864248	FALSE	Trmt1	tRNA methyltransferase 1 [Source:MGI Symbol;Acc:MGI:1289155]
TCONS_00026151	ENSMUSG00000001909	2.18233	2.30166	-1.05468	0.992444	0.995816	FALSE	Trmt1	tRNA methyltransferase 1 [Source:MGI Symbol;Acc:MGI:1289155]
TCONS_00029076	XLOC_018012	5.50901	7.68093	-1.39425	0.186057	0.521086	FALSE	TRM2A	tRNA (uracil-5-)-methyltransferase homolog A
TCONS_00006487	ENSMUSG00000034442	1.83153	5.07006	-2.76822	0.332851	0.641722	FALSE	Trmt5	TRM5 tRNA methyltransferase 5 [Source:MGI Symbol;Acc:MGI:1923607]
ENSMUST00000116420	ENSMUSG00000034442	3.90133	2.68052	1.45544	0.778138	0.90219	FALSE	Trmt5	TRM5 tRNA methyltransferase 5 [Source:MGI Symbol;Acc:MGI:1923607]
ENSMUST00000087541	ENSMUSG00000067369	0.045888	1.66409	-36.2642	0.0440913	0.242092	FALSE	Trmt2b	TRM2 tRNA methyltransferase 2B [Source:MGI Symbol;Acc:MGI:2442530]
ENSMUST00000113252	ENSMUSG00000067369	2.013	0.237861	8.4629	0.456682	0.730117	FALSE	Trmt2b	TRM2 tRNA methyltransferase 2B [Source:MGI Symbol;Acc:MGI:2442530]
ENSMUST00000145066	ENSMUSG00000067369	3.28561	2.72144	1.20731	0.920587	0.965724	FALSE	Trmt2b	TRM2 tRNA methyltransferase 2B [Source:MGI Symbol;Acc:MGI:2442530]
TCONS_00010190	ENSMUSG00000022721	2.33977	5.71931	-2.44439	0.273857	0.601435	FALSE	Trmt2a	TRM2 tRNA methyltransferase 2A [Source:MGI Symbol;Acc:MGI:96270]
TCONS_00010869	ENSMUSG00000022757	8.23829	4.12975	1.99486	0.234344	0.571704	FALSE	Tfg	Trk-fused gene [Source:MGI Symbol;Acc:MGI:1338041]
TCONS_00010870	ENSMUSG00000022757	5.53742	11.0355	-1.99291	0.240939	0.577569	FALSE	Tfg	Trk-fused gene [Source:MGI Symbol;Acc:MGI:1338041]
ENSMUST00000065515	ENSMUSG00000022757	16.3798	11.4889	1.4257	0.840734	0.927521	FALSE	Tfg	Trk-fused gene [Source:MGI Symbol;Acc:MGI:1338041]
ENSMUST00000090247	ENSMUSG00000022263	21.0776	14.8138	1.42284	0.188612	0.525104	FALSE	Trio	triple functional domain (PTPRF interacting) [Source:MGI Symbol;Acc:MGI:1927230]
ENSMUST00000227999	ENSMUSG00000022263	0.0891667	1.8892	-21.1873	0.199542	0.536866	FALSE	Trio	triple functional domain (PTPRF interacting) [Source:MGI Symbol;Acc:MGI:1927230]
ENSMUST00000226644	ENSMUSG00000022263	1.05727	2.86708	-2.71178	0.939427	0.974575	FALSE	Trio	triple functional domain (PTPRF interacting) [Source:MGI Symbol;Acc:MGI:1927230]
ENSMUST00000087933	ENSMUSG00000041763	4.53212	2.66051	1.70348	0.367969	0.671538	FALSE	Tpp2	tripeptidyl peptidase II [Source:MGI Symbol;Acc:MGI:102724]
ENSMUST00000188302	ENSMUSG00000041763	9.04833	1.08112	8.36944	0.490556	0.747692	FALSE	Tpp2	tripeptidyl peptidase II [Source:MGI Symbol;Acc:MGI:102724]
TCONS_00000158	ENSMUSG00000041763	21.6943	25.7554	-1.1872	0.493044	0.747692	FALSE	Tpp2	tripeptidyl peptidase II [Source:MGI Symbol;Acc:MGI:102724]
ENSMUST00000188313	ENSMUSG00000041763	1.27567	2.48926	-1.95134	0.81091	0.916055	FALSE	Tpp2	tripeptidyl peptidase II [Source:MGI Symbol;Acc:MGI:102724]
ENSMUST00000033184	ENSMUSG00000030894	20.1983	12.865	1.57002	0.188337	0.52481	FALSE	Tpp1	tripeptidyl peptidase I [Source:MGI Symbol;Acc:MGI:1336194]
ENSMUST00000210840	ENSMUSG00000030894	25.927	17.7355	1.46187	0.84281	0.92849	FALSE	Tpp1	tripeptidyl peptidase I [Source:MGI Symbol;Acc:MGI:1336194]
ENSMUST00000210066	ENSMUSG00000030894	2.5608	1.288	1.98819	0.878755	0.945724	FALSE	Tpp1	tripeptidyl peptidase I [Source:MGI Symbol;Acc:MGI:1336194]
ENSMUST00000026008	ENSMUSG00000025034	25.3869	25.7169	-1.013	0.606973	0.806488	FALSE	Trim8	tripartite motif-containing 8 [Source:MGI Symbol;Acc:MGI:1933302]
ENSMUST00000030638	ENSMUSG00000028834	11.604	4.80928	2.41284	0.752077	0.88918	FALSE	Trim63	tripartite motif-containing 63 [Source:MGI Symbol;Acc:MGI:2447992]
ENSMUST00000105875	ENSMUSG00000028834	14.7179	18.8162	-1.27846	0.858008	0.936608	FALSE	Trim63	tripartite motif-containing 63 [Source:MGI Symbol;Acc:MGI:2447992]
ENSMUST00000107802	ENSMUSG00000034317	20.5784	30.0932	-1.46237	0.0104281	0.115371	FALSE	Trim59	tripartite motif-containing 59 [Source:MGI Symbol;Acc:MGI:1914199]
ENSMUST00000136512	ENSMUSG00000034317	1.39529	8.99751	-6.44849	0.0315901	0.200321	FALSE	Trim59	tripartite motif-containing 59 [Source:MGI Symbol;Acc:MGI:1914199]
ENSMUST00000054384	ENSMUSG00000043279	8.07324	5.32244	1.51683	0.0426956	0.237504	FALSE	Trim56	tripartite motif-containing 56 [Source:MGI Symbol;Acc:MGI:2685298]
TCONS_00017748	ENSMUSG00000042766	0.0125467	6.76084	-538.855	0.000949026	0.0480398	TRUE	Trim46	tripartite motif-containing 46 [Source:MGI Symbol;Acc:MGI:2673000]
TCONS_00017747	ENSMUSG00000042766	1.64633	0.211029	7.80143	0.345734	0.651492	FALSE	Trim46	tripartite motif-containing 46 [Source:MGI Symbol;Acc:MGI:2673000]
ENSMUST00000102573	ENSMUSG00000027189	26.6532	21.4455	1.24283	0.0560772	0.276428	FALSE	Trim44	tripartite motif-containing 44 [Source:MGI Symbol;Acc:MGI:1931835]
TCONS_00004740	ENSMUSG00000040365	24.5967	28.7293	-1.16801	0.202123	0.539037	FALSE	Trim41	tripartite motif-containing 41 [Source:MGI Symbol;Acc:MGI:2384814]
ENSMUST00000047145	ENSMUSG00000040365	1.67459	2.19502	-1.31078	0.966363	0.985298	FALSE	Trim41	tripartite motif-containing 41 [Source:MGI Symbol;Acc:MGI:2384814]
ENSMUST00000041282	ENSMUSG00000018548	13.2782	14.5532	-1.09603	0.0252998	0.17935	FALSE	Trim37	tripartite motif-containing 37 [Source:MGI Symbol;Acc:MGI:2153072]
TCONS_00004018	ENSMUSG00000018548	3.4059	5.00721	-1.47016	0.157656	0.481056	FALSE	Trim37	tripartite motif-containing 37 [Source:MGI Symbol;Acc:MGI:2153072]
ENSMUST00000022623	ENSMUSG00000022043	46.9533	40.4057	1.16205	0.142514	0.457826	FALSE	Trim35	tripartite motif-containing 35 [Source:MGI Symbol;Acc:MGI:1914104]
ENSMUST00000106860	ENSMUSG00000033014	10.062	8.62169	1.16706	0.289268	0.604372	FALSE	Trim33	tripartite motif-containing 33 [Source:MGI Symbol;Acc:MGI:2137357]
ENSMUST00000107366	ENSMUSG00000051675	5.61445	7.45584	-1.32797	0.188797	0.52524	FALSE	Trim32	tripartite motif-containing 32 [Source:MGI Symbol;Acc:MGI:1917057]
ENSMUST00000050850	ENSMUSG00000051675	10.4243	9.64286	1.08104	0.290521	0.604462	FALSE	Trim32	tripartite motif-containing 32 [Source:MGI Symbol;Acc:MGI:1917057]
ENSMUST00000076922	ENSMUSG00000030921	2.07187	1.75419	1.1811	0.822782	0.921921	FALSE	Trim30a	tripartite motif-containing 30A [Source:MGI Symbol;Acc:MGI:98178]
ENSMUST00000147044	ENSMUSG00000036989	1.51548	0.490911	3.08707	0.840758	0.927521	FALSE	Trim3	tripartite motif-containing 3 [Source:MGI Symbol;Acc:MGI:1860040]
ENSMUST00000106789	ENSMUSG00000036989	1.74124	1.55464	1.12003	0.99108	0.995172	FALSE	Trim3	tripartite motif-containing 3 [Source:MGI Symbol;Acc:MGI:1860040]
ENSMUST00000005705	ENSMUSG00000005566	72.4487	110.644	-1.52721	0.00781668	0.101544	TRUE	Trim28	tripartite motif-containing 28 [Source:MGI Symbol;Acc:MGI:109274]
ENSMUST00000223065	ENSMUSG00000021326	14.5297	16.9803	-1.16866	0.10045	0.377383	FALSE	Trim27	tripartite motif-containing 27 [Source:MGI Symbol;Acc:MGI:97904]
ENSMUST00000021761	ENSMUSG00000021326	4.32148	6.21804	-1.43887	0.125836	0.428837	FALSE	Trim27	tripartite motif-containing 27 [Source:MGI Symbol;Acc:MGI:97904]
TCONS_00011464	ENSMUSG00000024457	8.19075	4.79419	1.70848	0.454179	0.728113	FALSE	Trim26	tripartite motif-containing 26 [Source:MGI Symbol;Acc:MGI:1337056]
ENSMUST00000053434	ENSMUSG00000024457	1.37479	3.50901	-2.5524	0.730974	0.878852	FALSE	Trim26	tripartite motif-containing 26 [Source:MGI Symbol;Acc:MGI:1337056]
ENSMUST00000100627	ENSMUSG00000000275	0.192504	1.32668	-6.89169	0.36259	0.667379	FALSE	Trim25	tripartite motif-containing 25 [Source:MGI Symbol;Acc:MGI:102749]
ENSMUST00000107896	ENSMUSG00000000275	5.07502	5.1249	-1.00983	0.533384	0.761621	FALSE	Trim25	tripartite motif-containing 25 [Source:MGI Symbol;Acc:MGI:102749]
ENSMUST00000120428	ENSMUSG00000029833	4.52534	2.72076	1.66326	0.525477	0.757541	FALSE	Trim24	tripartite motif-containing 24 [Source:MGI Symbol;Acc:MGI:109275]
ENSMUST00000022225	ENSMUSG00000021712	7.14967	6.24089	1.14562	0.743255	0.88504	FALSE	Trim23	tripartite motif-containing 23 [Source:MGI Symbol;Acc:MGI:1933161]
ENSMUST00000107691	ENSMUSG00000027993	0.429408	1.99358	-4.64262	0.0149212	0.137049	TRUE	Trim2	tripartite motif-containing 2 [Source:MGI Symbol;Acc:MGI:1933163]
TCONS_00017662	ENSMUSG00000027993	1.37974	0.122036	11.306	0.355808	0.660393	FALSE	Trim2	tripartite motif-containing 2 [Source:MGI Symbol;Acc:MGI:1933163]
ENSMUST00000107695	ENSMUSG00000027993	3.0356	2.19265	1.38444	0.462446	0.73439	FALSE	Trim2	tripartite motif-containing 2 [Source:MGI Symbol;Acc:MGI:1933163]
TCONS_00003623	ENSMUSG00000036964	0.00390167	8.13386	-2084.71	0.277068	0.601435	FALSE	Trim17	tripartite motif-containing 17 [Source:MGI Symbol;Acc:MGI:1861440]
TCONS_00019285	ENSMUSG00000039853	4.99677	0.000299	16711.6	0.211123	0.547137	FALSE	Trim14	tripartite motif-containing 14 [Source:MGI Symbol;Acc:MGI:1921985]
TCONS_00019284	ENSMUSG00000039853	4.58952	4.52814	1.01355	0.612723	0.810262	FALSE	Trim14	tripartite motif-containing 14 [Source:MGI Symbol;Acc:MGI:1921985]
TCONS_00019288	ENSMUSG00000039853	16.9193	21.1702	-1.25124	0.796849	0.910844	FALSE	Trim14	tripartite motif-containing 14 [Source:MGI Symbol;Acc:MGI:1921985]
ENSMUST00000039562	ENSMUSG00000035235	2.60639	1.24564	2.09241	0.0999458	0.376698	FALSE	Trim13	tripartite motif-containing 13 [Source:MGI Symbol;Acc:MGI:1913847]
ENSMUST00000093061	ENSMUSG00000020455	9.57695	7.84717	1.22043	0.140995	0.455246	FALSE	Trim11	tripartite motif-containing 11 [Source:MGI Symbol;Acc:MGI:2137355]
ENSMUST00000202145	ENSMUSG00000106755	63.2995	71.3154	-1.12664	0.941416	0.975194	FALSE	Tpi-rs11	triosephosphate isomerase related sequence 11 [Source:MGI Symbol;Acc:MGI:98799]
ENSMUST00000172132	ENSMUSG00000023456	877.433	896.522	-1.02176	0.780997	0.90395	FALSE	Tpi1	triosephosphate isomerase 1 [Source:MGI Symbol;Acc:MGI:98797]
ENSMUST00000149610	ENSMUSG00000023456	8.29872	7.92554	1.04709	0.895958	0.954252	FALSE	Tpi1	triosephosphate isomerase 1 [Source:MGI Symbol;Acc:MGI:98797]
ENSMUST00000130663	ENSMUSG00000033088	10.5975	3.41744	3.101	0.00451064	0.0788551	TRUE	Triobp	TRIO and F-actin binding protein [Source:MGI Symbol;Acc:MGI:1349410]
ENSMUST00000109687	ENSMUSG00000033088	0.535977	1.41756	-2.64482	0.0277754	0.188567	TRUE	Triobp	TRIO and F-actin binding protein [Source:MGI Symbol;Acc:MGI:1349410]
ENSMUST00000109688	ENSMUSG00000033088	4.98247	2.02805	2.45678	0.0639138	0.298421	FALSE	Triobp	TRIO and F-actin binding protein [Source:MGI Symbol;Acc:MGI:1349410]
ENSMUST00000109690	ENSMUSG00000033088	1.29999	1.33192	-1.02457	0.797947	0.911311	FALSE	Triobp	TRIO and F-actin binding protein [Source:MGI Symbol;Acc:MGI:1349410]
ENSMUST00000138299	ENSMUSG00000025571	10.8143	8.74735	1.23629	0.397272	0.695521	FALSE	Tnrc6c	trinucleotide repeat containing 6C [Source:MGI Symbol;Acc:MGI:2443265]
TCONS_00009202	ENSMUSG00000047888	7.25624	5.63465	1.28779	0.732355	0.879506	FALSE	Tnrc6b	trinucleotide repeat containing 6b [Source:MGI Symbol;Acc:MGI:2443730]
ENSMUST00000067689	ENSMUSG00000047888	4.29271	1.83372	2.34099	0.750325	0.888539	FALSE	Tnrc6b	trinucleotide repeat containing 6b [Source:MGI Symbol;Acc:MGI:2443730]
ENSMUST00000206888	ENSMUSG00000052707	1.09333	0.139574	7.83332	0.404906	0.701417	FALSE	Tnrc6a	trinucleotide repeat containing 6a [Source:MGI Symbol;Acc:MGI:2385292]
ENSMUST00000206126	ENSMUSG00000052707	2.56753	3.6611	-1.42592	0.439009	0.717882	FALSE	Tnrc6a	trinucleotide repeat containing 6a [Source:MGI Symbol;Acc:MGI:2385292]
ENSMUST00000094053	ENSMUSG00000052707	4.92203	5.18115	-1.05265	0.737647	0.882812	FALSE	Tnrc6a	trinucleotide repeat containing 6a [Source:MGI Symbol;Acc:MGI:2385292]
TCONS_00024440	ENSMUSG00000052707	4.97404	3.9735	1.2518	0.893031	0.95302	FALSE	Tnrc6a	trinucleotide repeat containing 6a [Source:MGI Symbol;Acc:MGI:2385292]
ENSMUST00000152247	ENSMUSG00000039477	11.5909	9.84444	1.17741	0.045193	0.24618	FALSE	Tnrc18	trinucleotide repeat containing 18 [Source:MGI Symbol;Acc:MGI:3648294]
ENSMUST00000198181	ENSMUSG00000039477	2.45112	2.84944	-1.16251	0.238298	0.574738	FALSE	Tnrc18	trinucleotide repeat containing 18 [Source:MGI Symbol;Acc:MGI:3648294]
ENSMUST00000040312	ENSMUSG00000032715	41.7096	33.9955	1.22691	0.584636	0.794286	FALSE	Trib3	tribbles pseudokinase 3 [Source:MGI Symbol;Acc:MGI:1345675]
ENSMUST00000177172	ENSMUSG00000024613	4.29432	9.28523	-2.16221	0.135006	0.444945	FALSE	Tcof1	treacle ribosome biogenesis factor 1 [Source:MGI Symbol;Acc:MGI:892003]
ENSMUST00000170350	ENSMUSG00000012535	8.60385	20.1917	-2.34682	0.201169	0.538078	FALSE	Tnpo3	transportin 3 [Source:MGI Symbol;Acc:MGI:1196412]
ENSMUST00000115251	ENSMUSG00000012535	27.2165	18.5462	1.46749	0.262367	0.594979	FALSE	Tnpo3	transportin 3 [Source:MGI Symbol;Acc:MGI:1196412]
ENSMUST00000012679	ENSMUSG00000012535	8.14852	7.13483	1.14208	0.555267	0.776051	FALSE	Tnpo3	transportin 3 [Source:MGI Symbol;Acc:MGI:1196412]
ENSMUST00000210576	ENSMUSG00000031691	10.3582	6.77346	1.52923	0.214491	0.550502	FALSE	Tnpo2	transportin 2 (importin 3, karyopherin beta 2b) [Source:MGI Symbol;Acc:MGI:2384849]
TCONS_00026179	ENSMUSG00000031691	1.31823	2.16117	-1.63945	0.39468	0.693623	FALSE	Tnpo2	transportin 2 (importin 3, karyopherin beta 2b) [Source:MGI Symbol;Acc:MGI:2384849]
TCONS_00026178	ENSMUSG00000031691	1.72683	2.36844	-1.37156	0.461501	0.733945	FALSE	Tnpo2	transportin 2 (importin 3, karyopherin beta 2b) [Source:MGI Symbol;Acc:MGI:2384849]
TCONS_00007751	ENSMUSG00000009470	34.3091	41.3989	-1.20665	0.0262293	0.182564	FALSE	Tnpo1	transportin 1 [Source:MGI Symbol;Acc:MGI:2681523]
TCONS_00029082	XLOC_018017	2.36362	2.55753	-1.08204	0.515983	0.751305	FALSE	TNG2	Transport and Golgi organization protein 2 homolog
ENSMUST00000212764	ENSMUSG00000041949	2.19328	2.90907	-1.32636	0.53379	0.761656	FALSE	Tango6	transport and golgi organization 6 [Source:MGI Symbol;Acc:MGI:2142786]
TCONS_00010686	ENSMUSG00000013539	1.31839	0.0398397	33.0924	0.226285	0.563502	FALSE	Tango2	transport and golgi organization 2 [Source:MGI Symbol;Acc:MGI:101825]
ENSMUST00000203345	ENSMUSG00000002871	3.78942	1.20606	3.14198	0.0618113	0.292653	FALSE	Tpra1	transmembrane protein, adipocyte asscociated 1 [Source:MGI Symbol;Acc:MGI:1345190]
ENSMUST00000055022	ENSMUSG00000002871	6.99565	3.9656	1.76408	0.149741	0.469729	FALSE	Tpra1	transmembrane protein, adipocyte asscociated 1 [Source:MGI Symbol;Acc:MGI:1345190]
ENSMUST00000203694	ENSMUSG00000002871	7.94723	5.28393	1.50404	0.164038	0.491372	FALSE	Tpra1	transmembrane protein, adipocyte asscociated 1 [Source:MGI Symbol;Acc:MGI:1345190]
ENSMUST00000204765	ENSMUSG00000002871	1.47283	3.01343	-2.04602	0.608224	0.807223	FALSE	Tpra1	transmembrane protein, adipocyte asscociated 1 [Source:MGI Symbol;Acc:MGI:1345190]
ENSMUST00000103242	ENSMUSG00000037278	27.6727	30.7739	-1.11207	0.0293161	0.193168	FALSE	Tmem97	transmembrane protein 97 [Source:MGI Symbol;Acc:MGI:1916321]
ENSMUST00000093912	ENSMUSG00000020747	5.56712	4.14961	1.3416	0.205967	0.542227	FALSE	Tmem94	transmembrane protein 94 [Source:MGI Symbol;Acc:MGI:1919197]
TCONS_00004368	ENSMUSG00000020747	5.85363	6.22909	-1.06414	0.569975	0.784605	FALSE	Tmem94	transmembrane protein 94 [Source:MGI Symbol;Acc:MGI:1919197]
ENSMUST00000165125	ENSMUSG00000026411	11.6468	9.03558	1.289	0.487276	0.747692	FALSE	Tmem9	transmembrane protein 9 [Source:MGI Symbol;Acc:MGI:1913491]
ENSMUST00000063719	ENSMUSG00000026411	13.9843	14.1352	-1.01079	0.943634	0.976463	FALSE	Tmem9	transmembrane protein 9 [Source:MGI Symbol;Acc:MGI:1913491]
TCONS_00004970	ENSMUSG00000045377	7.64844	9.76402	-1.2766	0.0166143	0.14367	FALSE	Tmem88	transmembrane protein 88 [Source:MGI Symbol;Acc:MGI:1914270]
TCONS_00015002	ENSMUSG00000014353	4.53093	3.02348	1.49858	0.1285	0.433171	FALSE	Tmem87b	transmembrane protein 87B [Source:MGI Symbol;Acc:MGI:1919727]
ENSMUST00000110325	ENSMUSG00000014353	13.6525	10.707	1.2751	0.995708	0.997768	FALSE	Tmem87b	transmembrane protein 87B [Source:MGI Symbol;Acc:MGI:1919727]
TCONS_00016163	ENSMUSG00000033808	16.3155	15.1933	1.07386	0.810512	0.916007	FALSE	Tmem87a	transmembrane protein 87A [Source:MGI Symbol;Acc:MGI:2441844]
TCONS_00017702	ENSMUSG00000001420	10.3652	8.57739	1.20843	0.148653	0.468115	FALSE	Tmem79	transmembrane protein 79 [Source:MGI Symbol;Acc:MGI:1919163]
ENSMUST00000065373	ENSMUSG00000025940	22.35	25.8413	-1.15621	0.501716	0.747692	FALSE	Tmem70	transmembrane protein 70 [Source:MGI Symbol;Acc:MGI:1915068]
ENSMUST00000069674	ENSMUSG00000055900	0.101397	4.07682	-40.2064	0.0129957	0.128236	TRUE	Tmem69	transmembrane protein 69 [Source:MGI Symbol;Acc:MGI:3045357]
TCONS_00019539	ENSMUSG00000055900	2.34448	1.84501	1.27071	0.435917	0.715606	FALSE	Tmem69	transmembrane protein 69 [Source:MGI Symbol;Acc:MGI:3045357]
ENSMUST00000029891	ENSMUSG00000028232	6.81378	8.75973	-1.28559	0.0932667	0.36327	FALSE	Tmem68	transmembrane protein 68 [Source:MGI Symbol;Acc:MGI:1919348]
ENSMUST00000072113	ENSMUSG00000062373	10.7452	6.24465	1.72071	0.00176596	0.0550491	TRUE	Tmem65	transmembrane protein 65 [Source:MGI Symbol;Acc:MGI:1922118]
ENSMUST00000062684	ENSMUSG00000043252	11.3263	9.00896	1.25723	0.00926179	0.11	FALSE	Tmem64	transmembrane protein 64 [Source:MGI Symbol;Acc:MGI:2140359]
ENSMUST00000113523	ENSMUSG00000036026	14.9796	18.5146	-1.23599	0.0833491	0.342807	FALSE	Tmem63b	transmembrane protein 63b [Source:MGI Symbol;Acc:MGI:2387609]
TCONS_00012258	ENSMUSG00000036026	5.86118	2.87493	2.03872	0.166343	0.494001	FALSE	Tmem63b	transmembrane protein 63b [Source:MGI Symbol;Acc:MGI:2387609]
ENSMUST00000027800	ENSMUSG00000026519	8.2537	4.96548	1.66222	0.00203877	0.0573421	TRUE	Tmem63a	transmembrane protein 63a [Source:MGI Symbol;Acc:MGI:2384789]
ENSMUST00000115259	ENSMUSG00000045435	12.8217	11.5174	1.11325	0.697792	0.861007	FALSE	Tmem60	transmembrane protein 60 [Source:MGI Symbol;Acc:MGI:2673965]
ENSMUST00000141013	ENSMUSG00000028618	31.0697	17.7697	1.74846	0.236118	0.573347	FALSE	Tmem59	transmembrane protein 59 [Source:MGI Symbol;Acc:MGI:1929278]
ENSMUST00000030361	ENSMUSG00000028618	88.3134	91.3202	-1.03405	0.395476	0.694087	FALSE	Tmem59	transmembrane protein 59 [Source:MGI Symbol;Acc:MGI:1929278]
ENSMUST00000128909	ENSMUSG00000028132	11.7499	14.4606	-1.2307	0.0583438	0.282793	FALSE	Tmem56	transmembrane protein 56 [Source:MGI Symbol;Acc:MGI:1923195]
ENSMUST00000036572	ENSMUSG00000040616	23.79	14.1987	1.67551	0.0109315	0.117662	TRUE	Tmem51	transmembrane protein 51 [Source:MGI Symbol;Acc:MGI:2384874]
ENSMUST00000023686	ENSMUSG00000022964	13.3467	8.50271	1.5697	0.00264858	0.0636104	TRUE	Tmem50b	transmembrane protein 50B [Source:MGI Symbol;Acc:MGI:1925225]
ENSMUST00000105863	ENSMUSG00000028822	3.99926	2.54762	1.5698	0.100342	0.377148	FALSE	Tmem50a	transmembrane protein 50A [Source:MGI Symbol;Acc:MGI:1919067]
ENSMUST00000030626	ENSMUSG00000028822	59.0154	44.0126	1.34087	0.104634	0.386433	FALSE	Tmem50a	transmembrane protein 50A [Source:MGI Symbol;Acc:MGI:1919067]
ENSMUST00000032183	ENSMUSG00000030095	28.799	20.4629	1.40738	0.179033	0.511195	FALSE	Tmem43	transmembrane protein 43 [Source:MGI Symbol;Acc:MGI:1921372]
ENSMUST00000153179	ENSMUSG00000030095	2.62409	1.73052	1.51636	0.564159	0.781345	FALSE	Tmem43	transmembrane protein 43 [Source:MGI Symbol;Acc:MGI:1921372]
ENSMUST00000140246	ENSMUSG00000030095	1.82067	1.98652	-1.0911	0.921746	0.966267	FALSE	Tmem43	transmembrane protein 43 [Source:MGI Symbol;Acc:MGI:1921372]
ENSMUST00000084733	ENSMUSG00000066233	8.33657	7.7109	1.08114	0.97246	0.987871	FALSE	Tmem42	transmembrane protein 42 [Source:MGI Symbol;Acc:MGI:1277176]
ENSMUST00000094097	ENSMUSG00000047554	17.0623	14.4723	1.17896	0.219787	0.555699	FALSE	Tmem41b	transmembrane protein 41B [Source:MGI Symbol;Acc:MGI:1289225]
ENSMUST00000171687	ENSMUSG00000002845	8.48534	6.16104	1.37726	0.0899909	0.356728	FALSE	Tmem39a	transmembrane protein 39a [Source:MGI Symbol;Acc:MGI:1915096]
ENSMUST00000160352	ENSMUSG00000037720	10.1886	7.65357	1.33122	0.226452	0.563506	FALSE	Tmem33	transmembrane protein 33 [Source:MGI Symbol;Acc:MGI:1915128]
ENSMUST00000163028	ENSMUSG00000037720	4.3454	5.61302	-1.29171	0.356449	0.661011	FALSE	Tmem33	transmembrane protein 33 [Source:MGI Symbol;Acc:MGI:1915128]
ENSMUST00000153815	ENSMUSG00000032328	6.00933	3.21944	1.86658	0.119308	0.416972	FALSE	Tmem30a	transmembrane protein 30A [Source:MGI Symbol;Acc:MGI:106402]
ENSMUST00000034878	ENSMUSG00000032328	55.4479	42.9808	1.29006	0.599819	0.803664	FALSE	Tmem30a	transmembrane protein 30A [Source:MGI Symbol;Acc:MGI:106402]
ENSMUST00000150360	ENSMUSG00000045917	3.00361	1.98147	1.51585	0.460092	0.732833	FALSE	Tmem268	transmembrane protein 268 [Source:MGI Symbol;Acc:MGI:1913920]
ENSMUST00000080336	ENSMUSG00000045917	21.085	15.3106	1.37716	0.705734	0.865833	FALSE	Tmem268	transmembrane protein 268 [Source:MGI Symbol;Acc:MGI:1913920]
TCONS_00018429	ENSMUSG00000045917	20.5486	13.2775	1.54764	0.841252	0.927799	FALSE	Tmem268	transmembrane protein 268 [Source:MGI Symbol;Acc:MGI:1913920]
ENSMUST00000095383	ENSMUSG00000060935	31.6527	21.9711	1.44065	0.000825496	0.0454261	FALSE	Tmem263	transmembrane protein 263 [Source:MGI Symbol;Acc:MGI:2143652]
ENSMUST00000133744	ENSMUSG00000036339	2.27632	0.792586	2.87201	0.164447	0.491381	FALSE	Tmem260	transmembrane protein 260 [Source:MGI Symbol;Acc:MGI:2443219]
ENSMUST00000124720	ENSMUSG00000036339	3.38953	2.38358	1.42203	0.622236	0.816386	FALSE	Tmem260	transmembrane protein 260 [Source:MGI Symbol;Acc:MGI:2443219]
ENSMUST00000111735	ENSMUSG00000036339	5.25771	4.33815	1.21197	0.767882	0.896675	FALSE	Tmem260	transmembrane protein 260 [Source:MGI Symbol;Acc:MGI:2443219]
ENSMUST00000156480	ENSMUSG00000036339	2.78111	2.76518	1.00576	0.927538	0.968717	FALSE	Tmem260	transmembrane protein 260 [Source:MGI Symbol;Acc:MGI:2443219]
ENSMUST00000124536	ENSMUSG00000013858	30.8054	28.9364	1.06459	0.0206627	0.162295	FALSE	Tmem259	transmembrane protein 259 [Source:MGI Symbol;Acc:MGI:2177957]
ENSMUST00000052885	ENSMUSG00000013858	6.84839	6.11509	1.11992	0.811154	0.916128	FALSE	Tmem259	transmembrane protein 259 [Source:MGI Symbol;Acc:MGI:2177957]
TCONS_00013418	ENSMUSG00000036372	3.51559	5.16185	-1.46827	0.197679	0.536035	FALSE	Tmem258	transmembrane protein 258 [Source:MGI Symbol;Acc:MGI:1916288]
ENSMUST00000128281	ENSMUSG00000070394	2.67773	3.59806	-1.3437	0.242149	0.578478	FALSE	Tmem256	transmembrane protein 256 [Source:MGI Symbol;Acc:MGI:1916436]
ENSMUST00000133967	ENSMUSG00000070394	2.40198	2.24579	1.06955	0.485289	0.747692	FALSE	Tmem256	transmembrane protein 256 [Source:MGI Symbol;Acc:MGI:1916436]
ENSMUST00000094065	ENSMUSG00000070394	31.3222	29.7608	1.05246	0.866293	0.940264	FALSE	Tmem256	transmembrane protein 256 [Source:MGI Symbol;Acc:MGI:1916436]
ENSMUST00000100819	ENSMUSG00000072680	4.89436	4.21716	1.16058	0.755798	0.891095	FALSE	Tmem254c	transmembrane protein 254c [Source:MGI Symbol;Acc:MGI:3711260]
ENSMUST00000022418	ENSMUSG00000021867	2.2971	2.44422	-1.06405	0.766985	0.896171	FALSE	Tmem254b	transmembrane protein 254b [Source:MGI Symbol;Acc:MGI:3710397]
ENSMUST00000133808	ENSMUSG00000087679	21.0803	20.575	1.02456	0.958869	0.982575	FALSE	Tmem250-ps	transmembrane protein 250, pseudogene [Source:MGI Symbol;Acc:MGI:1924939]
ENSMUST00000111298	ENSMUSG00000053094	30.3379	28.0296	1.08235	0.0201455	0.159945	FALSE	Tmem248	transmembrane protein 248 [Source:MGI Symbol;Acc:MGI:1918917]
ENSMUST00000107609	ENSMUSG00000055296	1.57427	12.2999	-7.81305	0.123267	0.424791	FALSE	Tmem245	transmembrane protein 245 [Source:MGI Symbol;Acc:MGI:2445107]
TCONS_00019315	ENSMUSG00000055296	13.6421	7.10618	1.91974	0.152049	0.4728	FALSE	Tmem245	transmembrane protein 245 [Source:MGI Symbol;Acc:MGI:2445107]
ENSMUST00000155625	ENSMUSG00000055296	5.05529	0.482579	10.4756	0.40088	0.69891	FALSE	Tmem245	transmembrane protein 245 [Source:MGI Symbol;Acc:MGI:2445107]
ENSMUST00000068792	ENSMUSG00000055296	6.45427	7.28617	-1.12889	0.616466	0.812619	FALSE	Tmem245	transmembrane protein 245 [Source:MGI Symbol;Acc:MGI:2445107]
ENSMUST00000115365	ENSMUSG00000079659	5.26767	5.95514	-1.13051	0.17041	0.49954	FALSE	Tmem243	transmembrane protein 243, mitochondrial [Source:MGI Symbol;Acc:MGI:3606159]
ENSMUST00000005053	ENSMUSG00000004945	47.6513	60.3811	-1.26714	0.174675	0.50512	FALSE	Tmem242	transmembrane protein 242 [Source:MGI Symbol;Acc:MGI:1917794]
TCONS_00001176	ENSMUSG00000038079	1.97432	7.6851	-3.89252	0.0976204	0.371909	FALSE	Tmem237	transmembrane protein 237 [Source:MGI Symbol;Acc:MGI:2138365]
ENSMUST00000087475	ENSMUSG00000038079	3.71845	2.36082	1.57507	0.562626	0.780171	FALSE	Tmem237	transmembrane protein 237 [Source:MGI Symbol;Acc:MGI:2138365]
TCONS_00001178	ENSMUSG00000038079	3.72584	1.44738	2.57419	0.703358	0.864649	FALSE	Tmem237	transmembrane protein 237 [Source:MGI Symbol;Acc:MGI:2138365]
TCONS_00001177	ENSMUSG00000038079	2.63635	2.22065	1.1872	0.728956	0.878415	FALSE	Tmem237	transmembrane protein 237 [Source:MGI Symbol;Acc:MGI:2138365]
TCONS_00018742	ENSMUSG00000028797	1.29767	4.73046	-3.64536	0.125955	0.428963	FALSE	Tmem234	transmembrane protein 234 [Source:MGI Symbol;Acc:MGI:1924049]
TCONS_00018741	ENSMUSG00000028797	5.05171	1.60474	3.148	0.467883	0.737852	FALSE	Tmem234	transmembrane protein 234 [Source:MGI Symbol;Acc:MGI:1924049]
ENSMUST00000152126	ENSMUSG00000028797	9.39454	11.2437	-1.19683	0.542837	0.767827	FALSE	Tmem234	transmembrane protein 234 [Source:MGI Symbol;Acc:MGI:1924049]
ENSMUST00000028816	ENSMUSG00000027341	11.043	5.82235	1.89666	0.158999	0.48319	FALSE	Tmem230	transmembrane protein 230 [Source:MGI Symbol;Acc:MGI:1917862]
ENSMUST00000105907	ENSMUSG00000028857	19.0214	20.9113	-1.09936	0.0442209	0.242562	FALSE	Tmem222	transmembrane protein 222 [Source:MGI Symbol;Acc:MGI:1098568]
ENSMUST00000121532	ENSMUSG00000060538	2.5626	3.54454	-1.38318	0.394287	0.693325	FALSE	Tmem219	transmembrane protein 219 [Source:MGI Symbol;Acc:MGI:1915992]
ENSMUST00000177004	ENSMUSG00000060538	1.59385	2.09793	-1.31627	0.963387	0.98443	FALSE	Tmem219	transmembrane protein 219 [Source:MGI Symbol;Acc:MGI:1915992]
ENSMUST00000202008	ENSMUSG00000038828	10.9936	9.75889	1.12652	0.873589	0.943782	FALSE	Tmem214	transmembrane protein 214 [Source:MGI Symbol;Acc:MGI:1916046]
ENSMUST00000115160	ENSMUSG00000029782	11.476	9.98011	1.14988	0.399198	0.697531	FALSE	Tmem209	transmembrane protein 209 [Source:MGI Symbol;Acc:MGI:1919899]
ENSMUST00000126705	ENSMUSG00000014856	4.53525	2.96315	1.53055	0.0850432	0.346074	FALSE	Tmem208	transmembrane protein 208 [Source:MGI Symbol;Acc:MGI:1913570]
TCONS_00026296	ENSMUSG00000014856	2.01063	3.13815	-1.56078	0.285257	0.604301	FALSE	Tmem208	transmembrane protein 208 [Source:MGI Symbol;Acc:MGI:1913570]
ENSMUST00000027940	ENSMUSG00000026627	9.29834	7.77021	1.19666	0.610408	0.808247	FALSE	Tmem206	transmembrane protein 206 [Source:MGI Symbol;Acc:MGI:1914200]
TCONS_00000908	ENSMUSG00000026627	3.19171	3.28829	-1.03026	0.739227	0.883303	FALSE	Tmem206	transmembrane protein 206 [Source:MGI Symbol;Acc:MGI:1914200]
ENSMUST00000213698	ENSMUSG00000040883	0.0816203	1.6348	-20.0294	0.211803	0.547858	FALSE	Tmem205	transmembrane protein 205 [Source:MGI Symbol;Acc:MGI:3045495]
ENSMUST00000046831	ENSMUSG00000040883	6.73621	3.80615	1.76982	0.24637	0.581237	FALSE	Tmem205	transmembrane protein 205 [Source:MGI Symbol;Acc:MGI:3045495]
ENSMUST00000217263	ENSMUSG00000040883	5.40147	1.99974	2.70108	0.663778	0.840705	FALSE	Tmem205	transmembrane protein 205 [Source:MGI Symbol;Acc:MGI:3045495]
ENSMUST00000104998	ENSMUSG00000078201	7.22162	6.46074	1.11777	0.396551	0.694793	FALSE	Tmem203	transmembrane protein 203 [Source:MGI Symbol;Acc:MGI:2443597]
TCONS_00028545	ENSMUSG00000049526	7.08884	3.73245	1.89925	0.304624	0.616525	FALSE	Tmem202	transmembrane protein 202 [Source:MGI Symbol;Acc:MGI:1921143]
TCONS_00028546	ENSMUSG00000049526	0.223151	3.26463	-14.6297	0.372217	0.67491	FALSE	Tmem202	transmembrane protein 202 [Source:MGI Symbol;Acc:MGI:1921143]
TCONS_00028547	ENSMUSG00000049526	0.970006	0.612954	1.58251	0.552869	0.774515	FALSE	Tmem202	transmembrane protein 202 [Source:MGI Symbol;Acc:MGI:1921143]
ENSMUST00000214580	ENSMUSG00000049526	0.728462	0.814894	-1.11865	0.865067	0.939979	FALSE	Tmem202	transmembrane protein 202 [Source:MGI Symbol;Acc:MGI:1921143]
ENSMUST00000139923	ENSMUSG00000044700	1.13322	2.84671	-2.51205	0.0531219	0.268746	FALSE	Tmem201	transmembrane protein 201 [Source:MGI Symbol;Acc:MGI:1196277]
TCONS_00019946	ENSMUSG00000044700	1.98767	3.17679	-1.59825	0.127229	0.430931	FALSE	Tmem201	transmembrane protein 201 [Source:MGI Symbol;Acc:MGI:1196277]
ENSMUST00000052566	ENSMUSG00000051232	26.6117	26.0025	1.02343	0.276332	0.601435	FALSE	Tmem199	transmembrane protein 199 [Source:MGI Symbol;Acc:MGI:2144113]
ENSMUST00000051011	ENSMUSG00000047090	4.44215	2.78457	1.59528	0.157421	0.480772	FALSE	Tmem198b	transmembrane protein 198b [Source:MGI Symbol;Acc:MGI:1921077]
TCONS_00000354	ENSMUSG00000051703	0.51507	2.57621	-5.00166	0.13783	0.449768	FALSE	Tmem198	transmembrane protein 198 [Source:MGI Symbol;Acc:MGI:2443133]
TCONS_00000353	ENSMUSG00000051703	3.90194	2.44876	1.59343	0.31177	0.62262	FALSE	Tmem198	transmembrane protein 198 [Source:MGI Symbol;Acc:MGI:2443133]
ENSMUST00000079896	ENSMUSG00000025521	6.55835	2.65017	2.47469	0.343849	0.650341	FALSE	Tmem192	transmembrane protein 192 [Source:MGI Symbol;Acc:MGI:1920317]
ENSMUST00000026595	ENSMUSG00000025521	7.64022	11.5983	-1.51806	0.516379	0.751353	FALSE	Tmem192	transmembrane protein 192 [Source:MGI Symbol;Acc:MGI:1920317]
TCONS_00025977	ENSMUSG00000025521	3.65306	1.62577	2.24698	0.725316	0.876399	FALSE	Tmem192	transmembrane protein 192 [Source:MGI Symbol;Acc:MGI:1920317]
ENSMUST00000209852	ENSMUSG00000025521	0.107224	1.02055	-9.51793	0.924926	0.96724	FALSE	Tmem192	transmembrane protein 192 [Source:MGI Symbol;Acc:MGI:1920317]
TCONS_00003134	ENSMUSG00000069520	4.14609	2.34802	1.76578	0.0860518	0.348293	FALSE	Tmem19	transmembrane protein 19 [Source:MGI Symbol;Acc:MGI:1914476]
ENSMUST00000219890	ENSMUSG00000069520	4.39359	1.8038	2.43574	0.401893	0.699411	FALSE	Tmem19	transmembrane protein 19 [Source:MGI Symbol;Acc:MGI:1914476]
ENSMUST00000092170	ENSMUSG00000069520	1.87699	1.43414	1.30879	0.686604	0.854278	FALSE	Tmem19	transmembrane protein 19 [Source:MGI Symbol;Acc:MGI:1914476]
ENSMUST00000217884	ENSMUSG00000069520	2.95246	2.22839	1.32493	0.697377	0.860911	FALSE	Tmem19	transmembrane protein 19 [Source:MGI Symbol;Acc:MGI:1914476]
ENSMUST00000217887	ENSMUSG00000069520	2.0806	2.68759	-1.29174	0.874235	0.944198	FALSE	Tmem19	transmembrane protein 19 [Source:MGI Symbol;Acc:MGI:1914476]
ENSMUST00000142148	ENSMUSG00000090213	1.08949	5.73527	-5.26416	0.321473	0.630937	FALSE	Tmem189	transmembrane protein 189 [Source:MGI Symbol;Acc:MGI:2142624]
ENSMUST00000006587	ENSMUSG00000090213	32.2233	15.3231	2.10293	0.746275	0.886249	FALSE	Tmem189	transmembrane protein 189 [Source:MGI Symbol;Acc:MGI:2142624]
ENSMUST00000183952	ENSMUSG00000098923	10.8465	9.18867	1.18042	0.21382	0.549605	FALSE	Tmem185b	transmembrane protein 185B [Source:MGI Symbol;Acc:MGI:1917634]
ENSMUST00000101506	ENSMUSG00000073139	6.94194	6.64688	1.04439	0.198821	0.536484	FALSE	Tmem185a	transmembrane protein 185A [Source:MGI Symbol;Acc:MGI:2448555]
ENSMUST00000154400	ENSMUSG00000073139	1.37136	0.173615	7.89885	0.346544	0.652121	FALSE	Tmem185a	transmembrane protein 185A [Source:MGI Symbol;Acc:MGI:2448555]
TCONS_00029829	ENSMUSG00000073139	5.54864	4.12292	1.3458	0.73949	0.883303	FALSE	Tmem185a	transmembrane protein 185A [Source:MGI Symbol;Acc:MGI:2448555]
ENSMUST00000034030	ENSMUSG00000031617	5.71396	3.82496	1.49386	0.152769	0.473126	FALSE	Tmem184c	transmembrane protein 184C [Source:MGI Symbol;Acc:MGI:2384562]
TCONS_00026900	ENSMUSG00000031617	5.84137	8.24074	-1.41075	0.366103	0.669574	FALSE	Tmem184c	transmembrane protein 184C [Source:MGI Symbol;Acc:MGI:2384562]
ENSMUST00000074991	ENSMUSG00000009035	8.48682	11.3146	-1.3332	0.313361	0.623554	FALSE	Tmem184b	transmembrane protein 184b [Source:MGI Symbol;Acc:MGI:2445179]
TCONS_00001495	ENSMUSG00000042305	0.699328	21.098	-30.1689	0.00218178	0.0589764	TRUE	Tmem183a	transmembrane protein 183A [Source:MGI Symbol;Acc:MGI:1914729]
TCONS_00001496	ENSMUSG00000042305	13.9338	0.448919	31.0386	0.0101567	0.113509	TRUE	Tmem183a	transmembrane protein 183A [Source:MGI Symbol;Acc:MGI:1914729]
ENSMUST00000049470	ENSMUSG00000042305	11.7028	7.58822	1.54223	0.332734	0.641572	FALSE	Tmem183a	transmembrane protein 183A [Source:MGI Symbol;Acc:MGI:1914729]
TCONS_00011783	ENSMUSG00000096780	0.723545	2.07262	-2.86454	0.163524	0.490647	FALSE	Tmem181b-ps	transmembrane protein 181B, pseudogene [Source:MGI Symbol;Acc:MGI:3779544]
TCONS_00011788	ENSMUSG00000096780	4.68651	2.2418	2.09051	0.239995	0.576941	FALSE	Tmem181b-ps	transmembrane protein 181B, pseudogene [Source:MGI Symbol;Acc:MGI:3779544]
TCONS_00011040	ENSMUSG00000038141	0.0234797	4.15684	-177.04	0.29573	0.608532	FALSE	Tmem181a	transmembrane protein 181A [Source:MGI Symbol;Acc:MGI:1924356]
TCONS_00011041	ENSMUSG00000038141	6.25667	1.2839	4.87318	0.52001	0.753806	FALSE	Tmem181a	transmembrane protein 181A [Source:MGI Symbol;Acc:MGI:1924356]
TCONS_00011039	ENSMUSG00000038141	11.0216	8.9093	1.23708	0.797209	0.911019	FALSE	Tmem181a	transmembrane protein 181A [Source:MGI Symbol;Acc:MGI:1924356]
ENSMUST00000203229	ENSMUSG00000029810	4.96682	0.112268	44.2409	0.00201152	0.0573421	TRUE	Tmem176b	transmembrane protein 176B [Source:MGI Symbol;Acc:MGI:1916348]
ENSMUST00000166247	ENSMUSG00000029810	7.08145	6.93239	1.0215	0.0377176	0.220961	FALSE	Tmem176b	transmembrane protein 176B [Source:MGI Symbol;Acc:MGI:1916348]
ENSMUST00000101429	ENSMUSG00000029810	22.9593	8.7633	2.61994	0.133859	0.442928	FALSE	Tmem176b	transmembrane protein 176B [Source:MGI Symbol;Acc:MGI:1916348]
TCONS_00023029	ENSMUSG00000029810	31.898	30.3787	1.05001	0.39669	0.694818	FALSE	Tmem176b	transmembrane protein 176B [Source:MGI Symbol;Acc:MGI:1916348]
ENSMUST00000204073	ENSMUSG00000029810	3.86138	15.7077	-4.06789	0.514329	0.750219	FALSE	Tmem176b	transmembrane protein 176B [Source:MGI Symbol;Acc:MGI:1916348]
ENSMUST00000164733	ENSMUSG00000029810	1.98704	5.41436	-2.72484	0.581944	0.792619	FALSE	Tmem176b	transmembrane protein 176B [Source:MGI Symbol;Acc:MGI:1916348]
TCONS_00022142	ENSMUSG00000023367	2.77294	1.71787	1.61418	0.345613	0.651441	FALSE	Tmem176a	transmembrane protein 176A [Source:MGI Symbol;Acc:MGI:1913308]
TCONS_00022141	ENSMUSG00000023367	3.09752	4.25189	-1.37268	0.445622	0.72179	FALSE	Tmem176a	transmembrane protein 176A [Source:MGI Symbol;Acc:MGI:1913308]
TCONS_00022140	ENSMUSG00000023367	2.178	2.87981	-1.32223	0.622136	0.816386	FALSE	Tmem176a	transmembrane protein 176A [Source:MGI Symbol;Acc:MGI:1913308]
ENSMUST00000120327	ENSMUSG00000013495	4.38126	3.05911	1.4322	0.286785	0.604301	FALSE	Tmem175	transmembrane protein 175 [Source:MGI Symbol;Acc:MGI:1919642]
TCONS_00020469	ENSMUSG00000013495	2.16228	1.57059	1.37674	0.295221	0.607821	FALSE	Tmem175	transmembrane protein 175 [Source:MGI Symbol;Acc:MGI:1919642]
ENSMUST00000115728	ENSMUSG00000024349	10.1052	5.97315	1.69177	0.00179716	0.0556051	TRUE	Tmem173	transmembrane protein 173 [Source:MGI Symbol;Acc:MGI:1919762]
TCONS_00012994	ENSMUSG00000024349	1.26405	2.33308	-1.84572	0.744453	0.885506	FALSE	Tmem173	transmembrane protein 173 [Source:MGI Symbol;Acc:MGI:1919762]
TCONS_00012996	ENSMUSG00000024349	2.688	1.72488	1.55837	0.97601	0.989311	FALSE	Tmem173	transmembrane protein 173 [Source:MGI Symbol;Acc:MGI:1919762]
ENSMUST00000129449	ENSMUSG00000087370	8.91718	6.30684	1.41389	0.00211392	0.0583768	FALSE	Tmem170b	transmembrane protein 170B [Source:MGI Symbol;Acc:MGI:3647046]
ENSMUST00000034431	ENSMUSG00000031953	1.4468	0.871693	1.65976	0.754053	0.890116	FALSE	Tmem170	transmembrane protein 170 [Source:MGI Symbol;Acc:MGI:106426]
ENSMUST00000031554	ENSMUSG00000029569	15.6418	12.0246	1.30082	0.486781	0.747692	FALSE	Tmem168	transmembrane protein 168 [Source:MGI Symbol;Acc:MGI:1921794]
ENSMUST00000106622	ENSMUSG00000068732	3.68073	1.71671	2.14406	0.00361845	0.0737879	TRUE	Tmem167b	transmembrane protein 167B [Source:MGI Symbol;Acc:MGI:1914745]
ENSMUST00000090546	ENSMUSG00000068732	14.4118	11.6382	1.23832	0.170072	0.499051	FALSE	Tmem167b	transmembrane protein 167B [Source:MGI Symbol;Acc:MGI:1914745]
ENSMUST00000161568	ENSMUSG00000012422	10.0949	9.3422	1.08057	0.838385	0.927253	FALSE	Tmem167	transmembrane protein 167 [Source:MGI Symbol;Acc:MGI:1913324]
ENSMUST00000031144	ENSMUSG00000029234	26.8102	22.0917	1.21359	0.319591	0.629256	FALSE	Tmem165	transmembrane protein 165 [Source:MGI Symbol;Acc:MGI:894407]
ENSMUST00000138544	ENSMUSG00000029234	5.66475	4.24155	1.33554	0.970697	0.98714	FALSE	Tmem165	transmembrane protein 165 [Source:MGI Symbol;Acc:MGI:894407]
TCONS_00029577	ENSMUSG00000047045	5.45108	6.11288	-1.12141	0.790114	0.908522	FALSE	Tmem164	transmembrane protein 164 [Source:MGI Symbol;Acc:MGI:2148020]
ENSMUST00000087333	ENSMUSG00000047045	3.89242	4.5956	-1.18065	0.834529	0.926458	FALSE	Tmem164	transmembrane protein 164 [Source:MGI Symbol;Acc:MGI:2148020]
ENSMUST00000112896	ENSMUSG00000047045	5.60728	4.13894	1.35476	0.970726	0.98714	FALSE	Tmem164	transmembrane protein 164 [Source:MGI Symbol;Acc:MGI:2148020]
TCONS_00001438	ENSMUSG00000026347	10.4303	1.60015	6.5183	0.0169112	0.145397	TRUE	Tmem163	transmembrane protein 163 [Source:MGI Symbol;Acc:MGI:1919410]
TCONS_00001441	ENSMUSG00000026347	1.54612	1.51817	1.01841	0.209823	0.54543	FALSE	Tmem163	transmembrane protein 163 [Source:MGI Symbol;Acc:MGI:1919410]
TCONS_00007146	ENSMUSG00000035762	1.69335	2.8427	-1.67874	0.229397	0.568099	FALSE	Tmem161b	transmembrane protein 161B [Source:MGI Symbol;Acc:MGI:1919995]
ENSMUST00000002413	ENSMUSG00000002342	2.70908	1.27409	2.12629	0.567339	0.783717	FALSE	Tmem161a	transmembrane protein 161A [Source:MGI Symbol;Acc:MGI:2384577]
ENSMUST00000182980	ENSMUSG00000002342	4.9969	5.10424	-1.02148	0.843403	0.928622	FALSE	Tmem161a	transmembrane protein 161A [Source:MGI Symbol;Acc:MGI:2384577]
ENSMUST00000019302	ENSMUSG00000019158	33.3971	30.7042	1.08771	0.339961	0.646466	FALSE	Tmem160	transmembrane protein 160 [Source:MGI Symbol;Acc:MGI:1916344]
ENSMUST00000033210	ENSMUSG00000030917	10.0227	9.45369	1.06018	0.594376	0.800342	FALSE	Tmem159	transmembrane protein 159 [Source:MGI Symbol;Acc:MGI:1925752]
ENSMUST00000077066	ENSMUSG00000061451	2.34831	0.247944	9.47111	0.000140561	0.0372108	TRUE	Tmem151a	transmembrane protein 151A [Source:MGI Symbol;Acc:MGI:2147713]
ENSMUST00000069695	ENSMUSG00000055912	4.3224	0.368495	11.7299	0.000275134	0.0380874	TRUE	Tmem150a	transmembrane protein 150A [Source:MGI Symbol;Acc:MGI:2385244]
TCONS_00006939	ENSMUSG00000021361	18.8327	22.575	-1.19871	0.135687	0.445944	FALSE	Tmem14c	transmembrane protein 14C [Source:MGI Symbol;Acc:MGI:1913404]
ENSMUST00000021790	ENSMUSG00000021361	71.4172	69.7732	1.02356	0.729878	0.878649	FALSE	Tmem14c	transmembrane protein 14C [Source:MGI Symbol;Acc:MGI:1913404]
ENSMUST00000006478	ENSMUSG00000006315	31.2921	31.4158	-1.00395	0.260582	0.594028	FALSE	Tmem147	transmembrane protein 147 [Source:MGI Symbol;Acc:MGI:1915011]
ENSMUST00000207263	ENSMUSG00000006315	4.23837	4.07075	1.04118	0.444997	0.721455	FALSE	Tmem147	transmembrane protein 147 [Source:MGI Symbol;Acc:MGI:1915011]
ENSMUST00000207779	ENSMUSG00000006315	2.1709	1.32979	1.63252	0.663573	0.840705	FALSE	Tmem147	transmembrane protein 147 [Source:MGI Symbol;Acc:MGI:1915011]
ENSMUST00000207296	ENSMUSG00000006315	2.75459	1.88837	1.45871	0.665436	0.841759	FALSE	Tmem147	transmembrane protein 147 [Source:MGI Symbol;Acc:MGI:1915011]
ENSMUST00000209065	ENSMUSG00000006315	3.5368	5.01277	-1.41732	0.79442	0.910151	FALSE	Tmem147	transmembrane protein 147 [Source:MGI Symbol;Acc:MGI:1915011]
TCONS_00017646	ENSMUSG00000027956	2.43829	3.41913	-1.40227	0.425449	0.714068	FALSE	Tmem144	transmembrane protein 144 [Source:MGI Symbol;Acc:MGI:1917902]
ENSMUST00000029568	ENSMUSG00000027956	3.88258	3.90806	-1.00656	0.719177	0.873128	FALSE	Tmem144	transmembrane protein 144 [Source:MGI Symbol;Acc:MGI:1917902]
TCONS_00022056	ENSMUSG00000057137	3.74285	1.71197	2.18629	0.511118	0.747975	FALSE	Tmem140	transmembrane protein 140 [Source:MGI Symbol;Acc:MGI:1915737]
ENSMUST00000041968	ENSMUSG00000039428	14.0673	13.0176	1.08064	0.11082	0.400337	FALSE	Tmem135	transmembrane protein 135 [Source:MGI Symbol;Acc:MGI:1920009]
ENSMUST00000139718	ENSMUSG00000024845	1.79952	1.00194	1.79604	0.758733	0.892648	FALSE	Tmem134	transmembrane protein 134 [Source:MGI Symbol;Acc:MGI:1914240]
TCONS_00013918	ENSMUSG00000024736	6.50617	12.362	-1.90004	0.004235	0.077464	TRUE	Tmem132a	transmembrane protein 132A [Source:MGI Symbol;Acc:MGI:2147810]
TCONS_00001039	ENSMUSG00000026116	21.8467	18.5143	1.18	0.293179	0.606301	FALSE	Tmem131	transmembrane protein 131 [Source:MGI Symbol;Acc:MGI:1927110]
ENSMUST00000194563	ENSMUSG00000026116	1.29598	3.11802	-2.40592	0.495078	0.747692	FALSE	Tmem131	transmembrane protein 131 [Source:MGI Symbol;Acc:MGI:1927110]
ENSMUST00000027290	ENSMUSG00000026116	2.26894	1.28327	1.76809	0.871819	0.943102	FALSE	Tmem131	transmembrane protein 131 [Source:MGI Symbol;Acc:MGI:1927110]
TCONS_00021142	ENSMUSG00000019295	4.78782	4.30252	1.11279	0.952686	0.980394	FALSE	Tmem129	transmembrane protein 129 [Source:MGI Symbol;Acc:MGI:1915616]
ENSMUST00000087511	ENSMUSG00000067365	32.0512	28.5923	1.12097	0.65931	0.838292	FALSE	Tmem128	transmembrane protein 128 [Source:MGI Symbol;Acc:MGI:1913559]
TCONS_00014987	ENSMUSG00000034850	0.233776	1.10322	-4.71915	0.471252	0.739952	FALSE	Tmem127	transmembrane protein 127 [Source:MGI Symbol;Acc:MGI:1916720]
ENSMUST00000035871	ENSMUSG00000034850	14.2314	15.5579	-1.09321	0.69735	0.860911	FALSE	Tmem127	transmembrane protein 127 [Source:MGI Symbol;Acc:MGI:1916720]
TCONS_00014988	ENSMUSG00000034850	4.18963	1.37389	3.04946	0.836735	0.926899	FALSE	Tmem127	transmembrane protein 127 [Source:MGI Symbol;Acc:MGI:1916720]
ENSMUST00000032844	ENSMUSG00000030615	22.088	26.393	-1.1949	0.0217873	0.166368	FALSE	Tmem126a	transmembrane protein 126A [Source:MGI Symbol;Acc:MGI:1913521]
ENSMUST00000052865	ENSMUSG00000050912	13.6394	14.0598	-1.03082	0.575159	0.787831	FALSE	Tmem123	transmembrane protein 123 [Source:MGI Symbol;Acc:MGI:1919179]
ENSMUST00000154371	ENSMUSG00000050912	2.78356	2.23864	1.24341	0.757172	0.891951	FALSE	Tmem123	transmembrane protein 123 [Source:MGI Symbol;Acc:MGI:1919179]
ENSMUST00000058491	ENSMUSG00000049036	1.86929	4.29519	-2.29777	0.171486	0.500889	FALSE	Tmem121	transmembrane protein 121 [Source:MGI Symbol;Acc:MGI:1916445]
ENSMUST00000141779	ENSMUSG00000039886	5.75103	5.2802	1.08917	0.418062	0.711016	FALSE	Tmem120a	transmembrane protein 120A [Source:MGI Symbol;Acc:MGI:2686991]
ENSMUST00000043378	ENSMUSG00000039886	12.2875	11.4141	1.07652	0.812129	0.916728	FALSE	Tmem120a	transmembrane protein 120A [Source:MGI Symbol;Acc:MGI:2686991]
TCONS_00020591	ENSMUSG00000029452	6.0474	8.33006	-1.37746	0.168525	0.49707	FALSE	Tmem116	transmembrane protein 116 [Source:MGI Symbol;Acc:MGI:1924712]
ENSMUST00000010189	ENSMUSG00000010045	17.2724	15.0079	1.15088	0.280109	0.603105	FALSE	Tmem115	transmembrane protein 115 [Source:MGI Symbol;Acc:MGI:1930765]
TCONS_00004896	ENSMUSG00000043284	2.93526	0.0881597	33.2948	0.231146	0.569357	FALSE	Tmem11	transmembrane protein 11 [Source:MGI Symbol;Acc:MGI:2144726]
ENSMUST00000062677	ENSMUSG00000043284	10.16	9.66156	1.05159	0.485061	0.747692	FALSE	Tmem11	transmembrane protein 11 [Source:MGI Symbol;Acc:MGI:2144726]
ENSMUST00000168218	ENSMUSG00000043284	3.53988	7.32325	-2.06879	0.568153	0.784121	FALSE	Tmem11	transmembrane protein 11 [Source:MGI Symbol;Acc:MGI:2144726]
ENSMUST00000038128	ENSMUSG00000034659	16.454	24.1627	-1.4685	0.0598008	0.286745	FALSE	Tmem109	transmembrane protein 109 [Source:MGI Symbol;Acc:MGI:1915789]
ENSMUST00000152142	ENSMUSG00000020895	1.28554	3.18383	-2.47666	0.241324	0.577888	FALSE	Tmem107	transmembrane protein 107 [Source:MGI Symbol;Acc:MGI:1914160]
ENSMUST00000075980	ENSMUSG00000020895	6.14025	5.54895	1.10656	0.962458	0.984118	FALSE	Tmem107	transmembrane protein 107 [Source:MGI Symbol;Acc:MGI:1914160]
ENSMUST00000229428	ENSMUSG00000052369	6.18883	6.55791	-1.05964	0.232953	0.57091	FALSE	Tmem106c	transmembrane protein 106C [Source:MGI Symbol;Acc:MGI:1196384]
TCONS_00009335	ENSMUSG00000052369	0.83669	1.90629	-2.27837	0.679949	0.850927	FALSE	Tmem106c	transmembrane protein 106C [Source:MGI Symbol;Acc:MGI:1196384]
ENSMUST00000064200	ENSMUSG00000052369	2.17605	1.55549	1.39895	0.869866	0.94216	FALSE	Tmem106c	transmembrane protein 106C [Source:MGI Symbol;Acc:MGI:1196384]
ENSMUST00000031556	ENSMUSG00000029571	46.1404	30.1172	1.53203	0.000581839	0.0416324	TRUE	Tmem106b	transmembrane protein 106B [Source:MGI Symbol;Acc:MGI:1919150]
ENSMUST00000122916	ENSMUSG00000029571	4.39061	2.39775	1.83114	0.257714	0.59075	FALSE	Tmem106b	transmembrane protein 106B [Source:MGI Symbol;Acc:MGI:1919150]
ENSMUST00000061450	ENSMUSG00000045980	10.8175	7.7337	1.39875	0.0949505	0.367406	FALSE	Tmem104	transmembrane protein 104 [Source:MGI Symbol;Acc:MGI:2444222]
ENSMUST00000100235	ENSMUSG00000045980	3.44158	0.967157	3.55845	0.172883	0.50293	FALSE	Tmem104	transmembrane protein 104 [Source:MGI Symbol;Acc:MGI:2444222]
ENSMUST00000021296	ENSMUSG00000020921	7.71946	9.16879	-1.18775	0.101003	0.378678	FALSE	Tmem101	transmembrane protein 101 [Source:MGI Symbol;Acc:MGI:1923797]
TCONS_00005384	ENSMUSG00000020921	9.21132	8.22802	1.11951	0.14156	0.45627	FALSE	Tmem101	transmembrane protein 101 [Source:MGI Symbol;Acc:MGI:1923797]
TCONS_00002219	ENSMUSG00000059406	4.14692	8.30693	-2.00316	0.153405	0.47378	FALSE	Tmprss9	transmembrane protease, serine 9 [Source:MGI Symbol;Acc:MGI:3612246]
ENSMUST00000109905	ENSMUSG00000058569	58.823	58.6014	1.00378	0.451264	0.726326	FALSE	Tmed9	transmembrane p24 trafficking protein 9 [Source:MGI Symbol;Acc:MGI:1914761]
ENSMUST00000037418	ENSMUSG00000034111	5.9694	4.78987	1.24626	0.112378	0.403148	FALSE	Tmed8	transmembrane p24 trafficking protein 8 [Source:MGI Symbol;Acc:MGI:1923480]
TCONS_00006587	ENSMUSG00000034111	3.56487	4.01623	-1.12661	0.270186	0.601435	FALSE	Tmed8	transmembrane p24 trafficking protein 8 [Source:MGI Symbol;Acc:MGI:1923480]
ENSMUST00000151189	ENSMUSG00000033184	12.7534	12.4496	1.02441	0.008953	0.108632	FALSE	Tmed7	transmembrane p24 trafficking protein 7 [Source:MGI Symbol;Acc:MGI:1913926]
ENSMUST00000002837	ENSMUSG00000063406	10.1342	9.63395	1.05193	0.270297	0.601435	FALSE	Tmed5	transmembrane p24 trafficking protein 5 [Source:MGI Symbol;Acc:MGI:1921586]
TCONS_00021413	ENSMUSG00000063406	1.5302	0.583181	2.62389	0.339821	0.646466	FALSE	Tmed5	transmembrane p24 trafficking protein 5 [Source:MGI Symbol;Acc:MGI:1921586]
ENSMUST00000004508	ENSMUSG00000004394	49.7758	45.3043	1.0987	0.119949	0.418593	FALSE	Tmed4	transmembrane p24 trafficking protein 4 [Source:MGI Symbol;Acc:MGI:1915070]
ENSMUST00000058488	ENSMUSG00000032353	48.8095	33.7751	1.44513	0.0345746	0.210606	FALSE	Tmed3	transmembrane p24 trafficking protein 3 [Source:MGI Symbol;Acc:MGI:1913361]
ENSMUST00000060226	ENSMUSG00000029390	121.281	109.696	1.10561	0.805495	0.914247	FALSE	Tmed2	transmembrane p24 trafficking protein 2 [Source:MGI Symbol;Acc:MGI:1929269]
ENSMUST00000224867	ENSMUSG00000114251	16.3075	17.4547	-1.07035	0.41264	0.707176	FALSE	Tmed10-ps	transmembrane p24 trafficking protein 10, pseudogene [Source:MGI Symbol;Acc:MGI:3782198]
ENSMUST00000222529	ENSMUSG00000021248	48.8736	40.9393	1.19381	0.262035	0.594956	FALSE	Tmed10	transmembrane p24 trafficking protein 10 [Source:MGI Symbol;Acc:MGI:1915831]
ENSMUST00000040766	ENSMUSG00000021248	47.0477	44.7069	1.05236	0.518465	0.752666	FALSE	Tmed10	transmembrane p24 trafficking protein 10 [Source:MGI Symbol;Acc:MGI:1915831]
ENSMUST00000034698	ENSMUSG00000032180	1.43385	3.30157	-2.30259	0.533436	0.761631	FALSE	Tmed1	transmembrane p24 trafficking protein 1 [Source:MGI Symbol;Acc:MGI:106201]
TCONS_00028259	ENSMUSG00000032180	2.50725	2.03522	1.23193	0.993446	0.99658	FALSE	Tmed1	transmembrane p24 trafficking protein 1 [Source:MGI Symbol;Acc:MGI:106201]
ENSMUST00000119455	ENSMUSG00000050106	1.63497	0.692032	2.36256	0.542237	0.76756	FALSE	Tmc8	transmembrane channel-like gene family 8 [Source:MGI Symbol;Acc:MGI:2669037]
ENSMUST00000106334	ENSMUSG00000050106	3.02465	4.46733	-1.47697	0.602362	0.80383	FALSE	Tmc8	transmembrane channel-like gene family 8 [Source:MGI Symbol;Acc:MGI:2669037]
TCONS_00004419	ENSMUSG00000050106	7.25287	3.92999	1.84552	0.610776	0.808534	FALSE	Tmc8	transmembrane channel-like gene family 8 [Source:MGI Symbol;Acc:MGI:2669037]
ENSMUST00000026659	ENSMUSG00000025572	27.8307	21.246	1.30993	0.0254265	0.18001	FALSE	Tmc6	transmembrane channel-like gene family 6 [Source:MGI Symbol;Acc:MGI:1098686]
ENSMUST00000103025	ENSMUSG00000025572	3.68228	1.12607	3.27003	0.0522006	0.26639	FALSE	Tmc6	transmembrane channel-like gene family 6 [Source:MGI Symbol;Acc:MGI:1098686]
ENSMUST00000143406	ENSMUSG00000025572	1.62708	10.4294	-6.40986	0.279113	0.602474	FALSE	Tmc6	transmembrane channel-like gene family 6 [Source:MGI Symbol;Acc:MGI:1098686]
ENSMUST00000023749	ENSMUSG00000023010	143.469	126.443	1.13466	0.0472763	0.2527	FALSE	Tmbim6	transmembrane BAX inhibitor motif containing 6 [Source:MGI Symbol;Acc:MGI:99682]
ENSMUST00000159209	ENSMUSG00000023010	3.0537	1.22156	2.49984	0.176643	0.50788	FALSE	Tmbim6	transmembrane BAX inhibitor motif containing 6 [Source:MGI Symbol;Acc:MGI:99682]
ENSMUST00000020446	ENSMUSG00000020225	32.805	27.095	1.21074	0.23698	0.574391	FALSE	Tmbim4	transmembrane BAX inhibitor motif containing 4 [Source:MGI Symbol;Acc:MGI:1915462]
ENSMUST00000141206	ENSMUSG00000020225	1.73275	0.992966	1.74503	0.881749	0.947399	FALSE	Tmbim4	transmembrane BAX inhibitor motif containing 4 [Source:MGI Symbol;Acc:MGI:1915462]
TCONS_00001248	ENSMUSG00000006301	23.1288	10.1626	2.27588	0.000353533	0.0403223	TRUE	Tmbim1	transmembrane BAX inhibitor motif containing 1 [Source:MGI Symbol;Acc:MGI:1916910]
ENSMUST00000199374	ENSMUSG00000046985	5.02714	1.77677	2.82937	0.245923	0.580953	FALSE	Tapt1	transmembrane anterior posterior transformation 1 [Source:MGI Symbol;Acc:MGI:2683537]
ENSMUST00000055128	ENSMUSG00000046985	18.5351	15.2324	1.21682	0.434756	0.715475	FALSE	Tapt1	transmembrane anterior posterior transformation 1 [Source:MGI Symbol;Acc:MGI:2683537]
ENSMUST00000036376	ENSMUSG00000034757	4.45906	0.658166	6.77498	0.421362	0.713159	FALSE	Tmub2	transmembrane and ubiquitin-like domain containing 2 [Source:MGI Symbol;Acc:MGI:1919303]
ENSMUST00000156326	ENSMUSG00000034757	8.90923	6.8541	1.29984	0.614784	0.811501	FALSE	Tmub2	transmembrane and ubiquitin-like domain containing 2 [Source:MGI Symbol;Acc:MGI:1919303]
ENSMUST00000100387	ENSMUSG00000034757	5.45247	5.36093	1.01708	0.726166	0.876786	FALSE	Tmub2	transmembrane and ubiquitin-like domain containing 2 [Source:MGI Symbol;Acc:MGI:1919303]
TCONS_00025784	ENSMUSG00000038497	8.0365	3.63713	2.20957	0.203711	0.53981	FALSE	Tmco3	transmembrane and coiled-coil domains 3 [Source:MGI Symbol;Acc:MGI:2444946]
TCONS_00025783	ENSMUSG00000038497	3.87687	2.54804	1.52151	0.468505	0.73827	FALSE	Tmco3	transmembrane and coiled-coil domains 3 [Source:MGI Symbol;Acc:MGI:2444946]
ENSMUST00000045229	ENSMUSG00000038497	4.08674	1.46919	2.78163	0.843854	0.928953	FALSE	Tmco3	transmembrane and coiled-coil domains 3 [Source:MGI Symbol;Acc:MGI:2444946]
TCONS_00001473	ENSMUSG00000042066	15.2324	6.6824	2.27948	4.26e-05	0.0281674	TRUE	Tmcc2	transmembrane and coiled-coil domains 2 [Source:MGI Symbol;Acc:MGI:1916125]
ENSMUST00000045473	ENSMUSG00000042066	23.0089	4.90541	4.69051	0.00488114	0.0824459	TRUE	Tmcc2	transmembrane and coiled-coil domains 2 [Source:MGI Symbol;Acc:MGI:1916125]
ENSMUST00000132435	ENSMUSG00000042066	7.53907	12.6329	-1.67566	0.00521489	0.0848022	TRUE	Tmcc2	transmembrane and coiled-coil domains 2 [Source:MGI Symbol;Acc:MGI:1916125]
ENSMUST00000195015	ENSMUSG00000052428	25.3442	35.018	-1.3817	0.346154	0.651727	FALSE	Tmco1	transmembrane and coiled-coil domains 1 [Source:MGI Symbol;Acc:MGI:1921173]
TCONS_00023388	ENSMUSG00000030126	5.1873	4.18189	1.24042	0.62298	0.816973	FALSE	Tmcc1	transmembrane and coiled coil domains 1 [Source:MGI Symbol;Acc:MGI:2442368]
ENSMUST00000149390	ENSMUSG00000068040	0.54858	2.86545	-5.2234	0.254414	0.588727	FALSE	Tm9sf4	transmembrane 9 superfamily protein member 4 [Source:MGI Symbol;Acc:MGI:2139220]
ENSMUST00000137446	ENSMUSG00000068040	1.18745	2.36172	-1.9889	0.594791	0.800575	FALSE	Tm9sf4	transmembrane 9 superfamily protein member 4 [Source:MGI Symbol;Acc:MGI:2139220]
ENSMUST00000152807	ENSMUSG00000068040	1.57899	0.766527	2.05993	0.610006	0.808056	FALSE	Tm9sf4	transmembrane 9 superfamily protein member 4 [Source:MGI Symbol;Acc:MGI:2139220]
ENSMUST00000089027	ENSMUSG00000068040	6.22702	5.19416	1.19885	0.623686	0.817315	FALSE	Tm9sf4	transmembrane 9 superfamily protein member 4 [Source:MGI Symbol;Acc:MGI:2139220]
TCONS_00015154	ENSMUSG00000068040	8.60589	5.58811	1.54003	0.806427	0.914358	FALSE	Tm9sf4	transmembrane 9 superfamily protein member 4 [Source:MGI Symbol;Acc:MGI:2139220]
ENSMUST00000025989	ENSMUSG00000025016	61.7504	55.1156	1.12038	0.0701783	0.313653	FALSE	Tm9sf3	transmembrane 9 superfamily member 3 [Source:MGI Symbol;Acc:MGI:1914262]
ENSMUST00000026624	ENSMUSG00000025544	55.1695	38.9648	1.41588	0.00551322	0.0867037	FALSE	Tm9sf2	transmembrane 9 superfamily member 2 [Source:MGI Symbol;Acc:MGI:1915309]
TCONS_00008591	ENSMUSG00000002320	3.90177	3.58419	1.0886	0.729344	0.878415	FALSE	Tm9sf1	transmembrane 9 superfamily member 1 [Source:MGI Symbol;Acc:MGI:1921390]
ENSMUST00000146588	ENSMUSG00000002320	2.67012	1.96279	1.36037	0.894609	0.95378	FALSE	Tm9sf1	transmembrane 9 superfamily member 1 [Source:MGI Symbol;Acc:MGI:1921390]
ENSMUST00000002391	ENSMUSG00000002320	6.56146	4.88856	1.34221	0.955802	0.981166	FALSE	Tm9sf1	transmembrane 9 superfamily member 1 [Source:MGI Symbol;Acc:MGI:1921390]
ENSMUST00000037709	ENSMUSG00000040234	32.0483	27.1384	1.18092	0.123038	0.424447	FALSE	Tm7sf3	transmembrane 7 superfamily member 3 [Source:MGI Symbol;Acc:MGI:1914873]
ENSMUST00000025713	ENSMUSG00000024799	8.46116	2.43603	3.47333	0.00810225	0.103631	TRUE	Tm7sf2	transmembrane 7 superfamily member 2 [Source:MGI Symbol;Acc:MGI:1920416]
ENSMUST00000025711	ENSMUSG00000024799	6.34721	8.8982	-1.40191	0.290396	0.604462	FALSE	Tm7sf2	transmembrane 7 superfamily member 2 [Source:MGI Symbol;Acc:MGI:1920416]
ENSMUST00000171384	ENSMUSG00000027800	10.1424	15.43	-1.52133	0.307346	0.619184	FALSE	Tm4sf1	transmembrane 4 superfamily member 1 [Source:MGI Symbol;Acc:MGI:104678]
ENSMUST00000198030	ENSMUSG00000027800	15.6038	21.5085	-1.37841	0.465681	0.735924	FALSE	Tm4sf1	transmembrane 4 superfamily member 1 [Source:MGI Symbol;Acc:MGI:104678]
ENSMUST00000052342	ENSMUSG00000033767	0.479299	1.8103	-3.77698	0.54035	0.766342	FALSE	Tmem131l	transmembrane 131 like [Source:MGI Symbol;Acc:MGI:2443399]
ENSMUST00000047419	ENSMUSG00000041736	58.2099	44.8675	1.29737	0.124991	0.42778	FALSE	Tspo	translocator protein [Source:MGI Symbol;Acc:MGI:88222]
ENSMUST00000027068	ENSMUSG00000025935	99.5021	85.7166	1.16083	0.166067	0.49354	FALSE	Tram1	translocating chain-associating membrane protein 1 [Source:MGI Symbol;Acc:MGI:1919515]
TCONS_00000650	ENSMUSG00000006005	0.169075	4.16477	-24.6327	0.280461	0.603391	FALSE	Tpr	translocated promoter region, nuclear basket protein [Source:MGI Symbol;Acc:MGI:1922066]
ENSMUST00000124973	ENSMUSG00000006005	22.2836	21.6995	1.02692	0.665682	0.841799	FALSE	Tpr	translocated promoter region, nuclear basket protein [Source:MGI Symbol;Acc:MGI:1922066]
ENSMUST00000119161	ENSMUSG00000006005	5.14977	4.28385	1.20214	0.819349	0.920536	FALSE	Tpr	translocated promoter region, nuclear basket protein [Source:MGI Symbol;Acc:MGI:1922066]
ENSMUST00000166897	ENSMUSG00000022752	43.2087	55.6067	-1.28693	0.0034113	0.0717933	FALSE	Tomm70a	translocase of outer mitochondrial membrane 70A [Source:MGI Symbol;Acc:MGI:106295]
ENSMUST00000030851	ENSMUSG00000028998	29.4691	34.7662	-1.17975	0.328452	0.637183	FALSE	Tomm7	translocase of outer mitochondrial membrane 7 [Source:MGI Symbol;Acc:MGI:1913419]
TCONS_00011548	ENSMUSG00000084880	8.72552	13.7205	-1.57246	0.207913	0.543485	FALSE	Tomm6os	translocase of outer mitochondrial membrane 6, opposite strand [Source:MGI Symbol;Acc:MGI:3705171]
ENSMUST00000113301	ENSMUSG00000033475	10.0308	13.1114	-1.30711	0.189484	0.526028	FALSE	Tomm6	translocase of outer mitochondrial membrane 6 [Source:MGI Symbol;Acc:MGI:1913369]
ENSMUST00000113302	ENSMUSG00000033475	9.23328	2.95112	3.12874	0.248554	0.583641	FALSE	Tomm6	translocase of outer mitochondrial membrane 6 [Source:MGI Symbol;Acc:MGI:1913369]
ENSMUST00000107808	ENSMUSG00000078713	6.66298	11.3899	-1.70944	0.132933	0.441239	FALSE	Tomm5	translocase of outer mitochondrial membrane 5 [Source:MGI Symbol;Acc:MGI:1915762]
ENSMUST00000107809	ENSMUSG00000078713	0.0801703	1.20362	-15.0133	0.322326	0.631357	FALSE	Tomm5	translocase of outer mitochondrial membrane 5 [Source:MGI Symbol;Acc:MGI:1915762]
ENSMUST00000107810	ENSMUSG00000078713	34.4714	24.4988	1.40707	0.342352	0.649245	FALSE	Tomm5	translocase of outer mitochondrial membrane 5 [Source:MGI Symbol;Acc:MGI:1915762]
ENSMUST00000032555	ENSMUSG00000002984	4.82913	8.52502	-1.76533	0.0469222	0.251414	FALSE	Tomm40	translocase of outer mitochondrial membrane 40 [Source:MGI Symbol;Acc:MGI:1858259]
TCONS_00024811	ENSMUSG00000002984	14.9013	17.4691	-1.17232	0.0808806	0.337523	FALSE	Tomm40	translocase of outer mitochondrial membrane 40 [Source:MGI Symbol;Acc:MGI:1858259]
ENSMUST00000018466	ENSMUSG00000018322	5.52469	7.16243	-1.29644	0.0275173	0.187585	FALSE	Tomm34	translocase of outer mitochondrial membrane 34 [Source:MGI Symbol;Acc:MGI:1914395]
ENSMUST00000109384	ENSMUSG00000018322	5.20221	6.82303	-1.31156	0.434506	0.715475	FALSE	Tomm34	translocase of outer mitochondrial membrane 34 [Source:MGI Symbol;Acc:MGI:1914395]
TCONS_00009173	ENSMUSG00000022427	8.66676	10.8442	-1.25124	0.0987877	0.373942	FALSE	Tomm22	translocase of outer mitochondrial membrane 22 [Source:MGI Symbol;Acc:MGI:2450248]
ENSMUST00000023062	ENSMUSG00000022427	31.1204	42.4261	-1.36329	0.122063	0.423001	FALSE	Tomm22	translocase of outer mitochondrial membrane 22 [Source:MGI Symbol;Acc:MGI:2450248]
ENSMUST00000127292	ENSMUSG00000022427	10.9252	13.1657	-1.20507	0.695732	0.860267	FALSE	Tomm22	translocase of outer mitochondrial membrane 22 [Source:MGI Symbol;Acc:MGI:2450248]
ENSMUST00000179857	ENSMUSG00000093904	24.6789	28.4092	-1.15115	0.0361382	0.215681	FALSE	Tomm20	translocase of outer mitochondrial membrane 20 [Source:MGI Symbol;Acc:MGI:1915202]
ENSMUST00000002925	ENSMUSG00000002846	22.6511	10.187	2.22354	0.277595	0.601474	FALSE	Timmdc1	translocase of inner mitochondrial membrane domain containing 1 [Source:MGI Symbol;Acc:MGI:1922139]
TCONS_00006474	ENSMUSG00000021079	7.60955	10.3352	-1.35818	0.146496	0.464929	FALSE	Timm9	translocase of inner mitochondrial membrane 9 [Source:MGI Symbol;Acc:MGI:1353436]
ENSMUST00000221559	ENSMUSG00000021079	3.2713	6.67751	-2.04124	0.543139	0.767946	FALSE	Timm9	translocase of inner mitochondrial membrane 9 [Source:MGI Symbol;Acc:MGI:1353436]
ENSMUST00000044051	ENSMUSG00000039016	33.4701	33.4607	1.00028	0.596837	0.801826	FALSE	Timm8b	translocase of inner mitochondrial membrane 8B [Source:MGI Symbol;Acc:MGI:1353424]
ENSMUST00000054213	ENSMUSG00000048007	7.06253	10.8494	-1.5362	0.0191166	0.15543	TRUE	Timm8a1	translocase of inner mitochondrial membrane 8A1 [Source:MGI Symbol;Acc:MGI:1353433]
ENSMUST00000081946	ENSMUSG00000003438	22.6977	34.5377	-1.52164	0.00329297	0.0706882	TRUE	Timm50	translocase of inner mitochondrial membrane 50 [Source:MGI Symbol;Acc:MGI:1913775]
ENSMUST00000149827	ENSMUSG00000002949	1.2858	3.47788	-2.70484	0.403691	0.700496	FALSE	Timm44	translocase of inner mitochondrial membrane 44 [Source:MGI Symbol;Acc:MGI:1343262]
ENSMUST00000003029	ENSMUSG00000002949	13.2404	9.95819	1.3296	0.465276	0.735636	FALSE	Timm44	translocase of inner mitochondrial membrane 44 [Source:MGI Symbol;Acc:MGI:1343262]
ENSMUST00000062125	ENSMUSG00000048429	4.99383	0.263915	18.9222	0.485459	0.747692	FALSE	Timm29	translocase of inner mitochondrial membrane 29 [Source:MGI Symbol;Acc:MGI:1917023]
ENSMUST00000013845	ENSMUSG00000013701	15.2621	17.6953	-1.15943	0.403888	0.700502	FALSE	Timm23	translocase of inner mitochondrial membrane 23 [Source:MGI Symbol;Acc:MGI:1858317]
TCONS_00008450	ENSMUSG00000013701	7.77709	0.215132	36.1503	0.475093	0.742005	FALSE	Timm23	translocase of inner mitochondrial membrane 23 [Source:MGI Symbol;Acc:MGI:1858317]
ENSMUST00000172052	ENSMUSG00000013701	2.92723	1.62702	1.79913	0.847976	0.931099	FALSE	Timm23	translocase of inner mitochondrial membrane 23 [Source:MGI Symbol;Acc:MGI:1858317]
ENSMUST00000021203	ENSMUSG00000020843	12.0878	14.7481	-1.22008	0.0475357	0.253366	FALSE	Timm22	translocase of inner mitochondrial membrane 22 [Source:MGI Symbol;Acc:MGI:1929742]
ENSMUST00000020440	ENSMUSG00000020219	20.8125	32.3006	-1.55198	0.0274153	0.187233	TRUE	Timm13	translocase of inner mitochondrial membrane 13 [Source:MGI Symbol;Acc:MGI:1353432]
ENSMUST00000028470	ENSMUSG00000027076	14.5739	20.2018	-1.38617	0.0483624	0.256024	FALSE	Timm10	translocase of inner mitochondrial membrane 10 [Source:MGI Symbol;Acc:MGI:1353429]
ENSMUST00000075896	ENSMUSG00000056820	29.3662	33.1908	-1.13024	0.0347958	0.211284	FALSE	Tsnax	translin-associated factor X [Source:MGI Symbol;Acc:MGI:1855672]
ENSMUST00000027623	ENSMUSG00000026374	16.4069	21.2915	-1.29772	0.0100019	0.112859	FALSE	Tsn	translin [Source:MGI Symbol;Acc:MGI:109263]
ENSMUST00000118448	ENSMUSG00000059058	18.8649	20.8899	-1.10735	0.59762	0.802127	FALSE	Tma7-ps	translational machinery associated 7 homolog (S. cerevisiae), pseudogene [Source:MGI Symbol;Acc:MGI:3705453]
TCONS_00028868	ENSMUSG00000091537	9.75126	14.5998	-1.49722	0.518064	0.752599	FALSE	Tma7	translational machinery associated 7 [Source:MGI Symbol;Acc:MGI:1913417]
ENSMUST00000167504	ENSMUSG00000091537	11.8906	9.85779	1.20622	0.834131	0.926203	FALSE	Tma7	translational machinery associated 7 [Source:MGI Symbol;Acc:MGI:1913417]
ENSMUST00000193868	ENSMUSG00000091537	1.97917	2.47801	-1.25205	0.881601	0.947363	FALSE	Tma7	translational machinery associated 7 [Source:MGI Symbol;Acc:MGI:1913417]
ENSMUST00000022529	ENSMUSG00000021957	17.5625	18.1033	-1.0308	0.113215	0.405148	FALSE	Tkt	transketolase [Source:MGI Symbol;Acc:MGI:105992]
ENSMUST00000223633	ENSMUSG00000021957	31.8432	38.578	-1.2115	0.321793	0.630937	FALSE	Tkt	transketolase [Source:MGI Symbol;Acc:MGI:105992]
ENSMUST00000225039	ENSMUSG00000021957	25.0864	37.0782	-1.47802	0.348961	0.654378	FALSE	Tkt	transketolase [Source:MGI Symbol;Acc:MGI:105992]
ENSMUST00000102643	ENSMUSG00000018507	24.7411	10.1269	2.44312	0.00922058	0.109943	TRUE	Trpv2	transient receptor potential cation channel, subfamily V, member 2 [Source:MGI Symbol;Acc:MGI:1341836]
ENSMUST00000130569	ENSMUSG00000018507	7.8825	5.49798	1.43371	0.694981	0.859785	FALSE	Trpv2	transient receptor potential cation channel, subfamily V, member 2 [Source:MGI Symbol;Acc:MGI:1341836]
ENSMUST00000018651	ENSMUSG00000018507	3.2081	4.62414	-1.4414	0.795212	0.910151	FALSE	Trpv2	transient receptor potential cation channel, subfamily V, member 2 [Source:MGI Symbol;Acc:MGI:1341836]
ENSMUST00000103224	ENSMUSG00000027365	17.3649	10.3925	1.67091	0.118025	0.414152	FALSE	Trpm7	transient receptor potential cation channel, subfamily M, member 7 [Source:MGI Symbol;Acc:MGI:1929996]
ENSMUST00000028843	ENSMUSG00000027365	5.25597	9.50838	-1.80906	0.349329	0.654715	FALSE	Trpm7	transient receptor potential cation channel, subfamily M, member 7 [Source:MGI Symbol;Acc:MGI:1929996]
ENSMUST00000205960	ENSMUSG00000030523	30.818	20.7849	1.48271	0.0858021	0.347699	FALSE	Trpm1	transient receptor potential cation channel, subfamily M, member 1 [Source:MGI Symbol;Acc:MGI:1330305]
ENSMUST00000206706	ENSMUSG00000030523	19.1932	6.03243	3.18167	0.123288	0.424791	FALSE	Trpm1	transient receptor potential cation channel, subfamily M, member 1 [Source:MGI Symbol;Acc:MGI:1330305]
ENSMUST00000205610	ENSMUSG00000030523	2.50827	0.364211	6.88686	0.14702	0.465599	FALSE	Trpm1	transient receptor potential cation channel, subfamily M, member 1 [Source:MGI Symbol;Acc:MGI:1330305]
ENSMUST00000205731	ENSMUSG00000030523	13.087	10.8514	1.20602	0.575554	0.788013	FALSE	Trpm1	transient receptor potential cation channel, subfamily M, member 1 [Source:MGI Symbol;Acc:MGI:1330305]
ENSMUST00000205434	ENSMUSG00000030523	4.20045	0.194836	21.5589	0.581856	0.792619	FALSE	Trpm1	transient receptor potential cation channel, subfamily M, member 1 [Source:MGI Symbol;Acc:MGI:1330305]
ENSMUST00000177102	ENSMUSG00000030523	2.98462	1.58295	1.88547	0.632453	0.822278	FALSE	Trpm1	transient receptor potential cation channel, subfamily M, member 1 [Source:MGI Symbol;Acc:MGI:1330305]
ENSMUST00000041059	ENSMUSG00000038324	12.6911	7.89776	1.60692	0.202416	0.53921	FALSE	Trpc4ap	transient receptor potential cation channel, subfamily C, member 4 associated protein [Source:MGI Symbol;Acc:MGI:1930751]
ENSMUST00000103140	ENSMUSG00000038324	32.0713	33.1266	-1.03291	0.770146	0.897771	FALSE	Trpc4ap	transient receptor potential cation channel, subfamily C, member 4 associated protein [Source:MGI Symbol;Acc:MGI:1930751]
ENSMUST00000014321	ENSMUSG00000014177	16.0916	14.3032	1.12503	0.344468	0.65099	FALSE	Tvp23b	trans-golgi network vesicle protein 23B [Source:MGI Symbol;Acc:MGI:1914760]
ENSMUST00000070524	ENSMUSG00000056429	57.6927	39.5189	1.45988	0.000899524	0.0471756	FALSE	Tgoln1	trans-golgi network protein [Source:MGI Symbol;Acc:MGI:105080]
TCONS_00020187	ENSMUSG00000037313	9.82656	21.4629	-2.18417	0.0352409	0.212474	FALSE	Tacc3	transforming, acidic coiled-coil containing protein 3 [Source:MGI Symbol;Acc:MGI:1341163]
ENSMUST00000114426	ENSMUSG00000037313	2.02527	3.72767	-1.84058	0.146355	0.464572	FALSE	Tacc3	transforming, acidic coiled-coil containing protein 3 [Source:MGI Symbol;Acc:MGI:1341163]
ENSMUST00000074849	ENSMUSG00000037313	3.03615	4.0966	-1.34927	0.468449	0.73827	FALSE	Tacc3	transforming, acidic coiled-coil containing protein 3 [Source:MGI Symbol;Acc:MGI:1341163]
TCONS_00024542	ENSMUSG00000030852	2.90804	1.54713	1.87964	0.0518902	0.265766	FALSE	Tacc2	transforming, acidic coiled-coil containing protein 2 [Source:MGI Symbol;Acc:MGI:1928899]
TCONS_00026658	ENSMUSG00000065954	20.8428	17.26	1.20758	0.0830966	0.34225	FALSE	Tacc1	transforming, acidic coiled-coil containing protein 1 [Source:MGI Symbol;Acc:MGI:2443510]
ENSMUST00000061101	ENSMUSG00000032440	6.43727	4.96522	1.29647	0.510332	0.747692	FALSE	Tgfbr2	transforming growth factor, beta receptor II [Source:MGI Symbol;Acc:MGI:98729]
ENSMUST00000007757	ENSMUSG00000007613	12.9075	11.0298	1.17024	0.0998723	0.376582	FALSE	Tgfbr1	transforming growth factor, beta receptor I [Source:MGI Symbol;Acc:MGI:98728]
TCONS_00001076	ENSMUSG00000070939	2.65171	1.16244	2.28115	0.332564	0.641572	FALSE	Tgfbrap1	transforming growth factor, beta receptor associated protein 1 [Source:MGI Symbol;Acc:MGI:2447427]
ENSMUST00000186694	ENSMUSG00000070939	4.65786	2.8663	1.62504	0.338654	0.646365	FALSE	Tgfbrap1	transforming growth factor, beta receptor associated protein 1 [Source:MGI Symbol;Acc:MGI:2447427]
ENSMUST00000095014	ENSMUSG00000070939	5.09935	3.40939	1.49568	0.824776	0.922403	FALSE	Tgfbrap1	transforming growth factor, beta receptor associated protein 1 [Source:MGI Symbol;Acc:MGI:2447427]
ENSMUST00000003687	ENSMUSG00000021253	7.69899	6.0266	1.2775	0.240386	0.577077	FALSE	Tgfb3	transforming growth factor, beta 3 [Source:MGI Symbol;Acc:MGI:98727]
ENSMUST00000002678	ENSMUSG00000002603	5.28731	2.54927	2.07405	0.0299687	0.195204	TRUE	Tgfb1	transforming growth factor, beta 1 [Source:MGI Symbol;Acc:MGI:98725]
ENSMUST00000000394	ENSMUSG00000000384	11.2951	14.0588	-1.24469	0.00799692	0.103041	FALSE	Tbrg4	transforming growth factor beta regulated gene 4 [Source:MGI Symbol;Acc:MGI:1100868]
ENSMUST00000117654	ENSMUSG00000011114	44.5104	31.9084	1.39494	0.0209967	0.163871	FALSE	Tbrg1	transforming growth factor beta regulated gene 1 [Source:MGI Symbol;Acc:MGI:1100877]
ENSMUST00000161286	ENSMUSG00000022858	17.1787	21.643	-1.25987	0.00377361	0.0751934	FALSE	Tra2b	transformer 2 beta [Source:MGI Symbol;Acc:MGI:106016]
TCONS_00010724	ENSMUSG00000022858	17.1832	21.2549	-1.23696	0.195107	0.533864	FALSE	Tra2b	transformer 2 beta [Source:MGI Symbol;Acc:MGI:106016]
ENSMUST00000031841	ENSMUSG00000029817	3.7622	8.39841	-2.23232	0.0546715	0.273324	FALSE	Tra2a	transformer 2 alpha [Source:MGI Symbol;Acc:MGI:1933972]
ENSMUST00000204013	ENSMUSG00000029817	5.66258	4.18445	1.35324	0.150964	0.472114	FALSE	Tra2a	transformer 2 alpha [Source:MGI Symbol;Acc:MGI:1933972]
ENSMUST00000204189	ENSMUSG00000029817	11.7585	17.3827	-1.47831	0.172522	0.502585	FALSE	Tra2a	transformer 2 alpha [Source:MGI Symbol;Acc:MGI:1933972]
ENSMUST00000204818	ENSMUSG00000029817	15.2195	13.5558	1.12273	0.7157	0.871418	FALSE	Tra2a	transformer 2 alpha [Source:MGI Symbol;Acc:MGI:1933972]
ENSMUST00000203820	ENSMUSG00000029817	13.8783	16.2734	-1.17258	0.938213	0.974144	FALSE	Tra2a	transformer 2 alpha [Source:MGI Symbol;Acc:MGI:1933972]
TCONS_00001481	ENSMUSG00000054387	2.4136	1.37316	1.7577	0.400913	0.69891	FALSE	Mdm4	transformed mouse 3T3 cell double minute 4 [Source:MGI Symbol;Acc:MGI:107934]
ENSMUST00000105263	ENSMUSG00000020184	0.582065	6.84708	-11.7634	0.300899	0.61265	FALSE	Mdm2	transformed mouse 3T3 cell double minute 2 [Source:MGI Symbol;Acc:MGI:96952]
ENSMUST00000020408	ENSMUSG00000020184	6.96162	0.582047	11.9606	0.559943	0.779161	FALSE	Mdm2	transformed mouse 3T3 cell double minute 2 [Source:MGI Symbol;Acc:MGI:96952]
ENSMUST00000155285	ENSMUSG00000020184	13.1073	12.6698	1.03453	0.774471	0.899831	FALSE	Mdm2	transformed mouse 3T3 cell double minute 2 [Source:MGI Symbol;Acc:MGI:96952]
TCONS_00003159	ENSMUSG00000020184	24.2501	24.7652	-1.02124	0.955826	0.981166	FALSE	Mdm2	transformed mouse 3T3 cell double minute 2 [Source:MGI Symbol;Acc:MGI:96952]
ENSMUST00000094120	ENSMUSG00000045482	0.290899	1.90241	-6.53977	0.209557	0.545262	FALSE	Trrap	transformation/transcription domain-associated protein [Source:MGI Symbol;Acc:MGI:2153272]
ENSMUST00000038980	ENSMUSG00000045482	0.74772	2.32824	-3.11378	0.337404	0.645906	FALSE	Trrap	transformation/transcription domain-associated protein [Source:MGI Symbol;Acc:MGI:2153272]
TCONS_00020891	ENSMUSG00000045482	13.4878	4.55755	2.95945	0.348683	0.654098	FALSE	Trrap	transformation/transcription domain-associated protein [Source:MGI Symbol;Acc:MGI:2153272]
ENSMUST00000198524	ENSMUSG00000045482	1.91473	0.906597	2.112	0.361941	0.666719	FALSE	Trrap	transformation/transcription domain-associated protein [Source:MGI Symbol;Acc:MGI:2153272]
TCONS_00020893	ENSMUSG00000045482	0.007128	1.0477	-146.984	0.557692	0.777547	FALSE	Trrap	transformation/transcription domain-associated protein [Source:MGI Symbol;Acc:MGI:2153272]
ENSMUST00000132347	ENSMUSG00000045482	3.98678	3.01888	1.32061	0.763195	0.894333	FALSE	Trrap	transformation/transcription domain-associated protein [Source:MGI Symbol;Acc:MGI:2153272]
TCONS_00020894	ENSMUSG00000045482	1.75134	2.36309	-1.3493	0.794904	0.910151	FALSE	Trrap	transformation/transcription domain-associated protein [Source:MGI Symbol;Acc:MGI:2153272]
TCONS_00020892	ENSMUSG00000045482	1.8578	2.42242	-1.30392	0.827106	0.923559	FALSE	Trrap	transformation/transcription domain-associated protein [Source:MGI Symbol;Acc:MGI:2153272]
ENSMUST00000213013	ENSMUSG00000045482	3.18986	1.86221	1.71295	0.931952	0.971002	FALSE	Trrap	transformation/transcription domain-associated protein [Source:MGI Symbol;Acc:MGI:2153272]
ENSMUST00000030896	ENSMUSG00000029030	32.7387	22.2065	1.47428	0.000220492	0.0380874	FALSE	Tprgl	transformation related protein 63 regulated like [Source:MGI Symbol;Acc:MGI:1915058]
ENSMUST00000043237	ENSMUSG00000038375	64.1098	20.3957	3.14329	0.00018039	0.0380874	TRUE	Trp53inp2	transformation related protein 53 inducible nuclear protein 2 [Source:MGI Symbol;Acc:MGI:1915978]
ENSMUST00000134218	ENSMUSG00000038375	5.1369	2.44078	2.10462	0.0172326	0.146832	TRUE	Trp53inp2	transformation related protein 53 inducible nuclear protein 2 [Source:MGI Symbol;Acc:MGI:1915978]
ENSMUST00000029865	ENSMUSG00000028211	35.7859	23.2253	1.54081	0.0181332	0.151842	TRUE	Trp53inp1	transformation related protein 53 inducible nuclear protein 1 [Source:MGI Symbol;Acc:MGI:1926609]
TCONS_00018195	ENSMUSG00000028211	10.6438	5.95163	1.78839	0.0271832	0.186602	TRUE	Trp53inp1	transformation related protein 53 inducible nuclear protein 1 [Source:MGI Symbol;Acc:MGI:1926609]
ENSMUST00000132010	ENSMUSG00000028211	7.9193	3.95425	2.00273	0.0738375	0.321857	FALSE	Trp53inp1	transformation related protein 53 inducible nuclear protein 1 [Source:MGI Symbol;Acc:MGI:1926609]
ENSMUST00000108658	ENSMUSG00000059552	4.15003	11.4445	-2.7577	0.0986791	0.373873	FALSE	Trp53	transformation related protein 53 [Source:MGI Symbol;Acc:MGI:98834]
ENSMUST00000005371	ENSMUSG00000059552	7.90945	9.86543	-1.2473	0.169847	0.498921	FALSE	Trp53	transformation related protein 53 [Source:MGI Symbol;Acc:MGI:98834]
ENSMUST00000171247	ENSMUSG00000059552	0.0784553	0.947277	-12.0741	0.262377	0.594979	FALSE	Trp53	transformation related protein 53 [Source:MGI Symbol;Acc:MGI:98834]
ENSMUST00000147512	ENSMUSG00000059552	1.57944	2.75961	-1.74721	0.290605	0.604462	FALSE	Trp53	transformation related protein 53 [Source:MGI Symbol;Acc:MGI:98834]
ENSMUST00000108657	ENSMUSG00000059552	25.0805	26.4557	-1.05483	0.705107	0.865513	FALSE	Trp53	transformation related protein 53 [Source:MGI Symbol;Acc:MGI:98834]
ENSMUST00000023486	ENSMUSG00000022797	86.8937	102.687	-1.18176	0.132035	0.44033	FALSE	Tfrc	transferrin receptor [Source:MGI Symbol;Acc:MGI:98822]
ENSMUST00000120680	ENSMUSG00000022797	7.95949	6.75347	1.17858	0.503339	0.747692	FALSE	Tfrc	transferrin receptor [Source:MGI Symbol;Acc:MGI:98822]
ENSMUST00000035158	ENSMUSG00000032554	56.944	79.8349	-1.40199	0.0440815	0.242092	FALSE	Trf	transferrin [Source:MGI Symbol;Acc:MGI:98821]
TCONS_00019384	ENSMUSG00000008305	2.31291	0.574914	4.02305	0.17048	0.49954	FALSE	Tle1	transducin-like enhancer of split 1 [Source:MGI Symbol;Acc:MGI:104636]
TCONS_00019383	ENSMUSG00000008305	2.30126	1.29398	1.77843	0.582469	0.792698	FALSE	Tle1	transducin-like enhancer of split 1 [Source:MGI Symbol;Acc:MGI:104636]
TCONS_00019386	ENSMUSG00000008305	2.14314	2.98329	-1.39202	0.774135	0.8998	FALSE	Tle1	transducin-like enhancer of split 1 [Source:MGI Symbol;Acc:MGI:104636]
ENSMUST00000046534	ENSMUSG00000040688	4.22563	5.53173	-1.30909	0.465371	0.735714	FALSE	Tbl3	transducin (beta)-like 3 [Source:MGI Symbol;Acc:MGI:2384863]
ENSMUST00000126319	ENSMUSG00000040688	5.37542	6.47148	-1.2039	0.551713	0.77388	FALSE	Tbl3	transducin (beta)-like 3 [Source:MGI Symbol;Acc:MGI:2384863]
ENSMUST00000063988	ENSMUSG00000027630	0.00847533	3.5662	-420.774	0.00132639	0.0522422	TRUE	Tbl1xr1	transducin (beta)-like 1X-linked receptor 1 [Source:MGI Symbol;Acc:MGI:2441730]
ENSMUST00000193734	ENSMUSG00000027630	3.75166	1.66635	2.25143	0.078318	0.331598	FALSE	Tbl1xr1	transducin (beta)-like 1X-linked receptor 1 [Source:MGI Symbol;Acc:MGI:2441730]
ENSMUST00000202747	ENSMUSG00000027630	6.42879	12.4465	-1.93606	0.234599	0.571869	FALSE	Tbl1xr1	transducin (beta)-like 1X-linked receptor 1 [Source:MGI Symbol;Acc:MGI:2441730]
ENSMUST00000088217	ENSMUSG00000025246	16.3823	14.3936	1.13816	0.535903	0.762913	FALSE	Tbl1x	transducin (beta)-like 1 X-linked [Source:MGI Symbol;Acc:MGI:1336172]
TCONS_00004068	ENSMUSG00000037573	44.7536	11.977	3.73663	0.183452	0.517558	FALSE	Tob1	transducer of ErbB-2.1 [Source:MGI Symbol;Acc:MGI:1349721]
ENSMUST00000041589	ENSMUSG00000037573	1.46301	14.239	-9.73263	0.372106	0.67491	FALSE	Tob1	transducer of ErbB-2.1 [Source:MGI Symbol;Acc:MGI:1349721]
ENSMUST00000050467	ENSMUSG00000048546	14.7049	10.3657	1.41861	0.224323	0.561249	FALSE	Tob2	transducer of ERBB2, 2 [Source:MGI Symbol;Acc:MGI:1888525]
TCONS_00009789	ENSMUSG00000048546	3.0024	6.53429	-2.17636	0.551523	0.773809	FALSE	Tob2	transducer of ERBB2, 2 [Source:MGI Symbol;Acc:MGI:1888525]
TCONS_00009788	ENSMUSG00000048546	2.09002	0.727996	2.87092	0.941465	0.975194	FALSE	Tob2	transducer of ERBB2, 2 [Source:MGI Symbol;Acc:MGI:1888525]
ENSMUST00000004494	ENSMUSG00000031622	18.6307	14.9796	1.24374	0.00498248	0.0831485	FALSE	Sin3b	transcriptional regulator, SIN3B (yeast) [Source:MGI Symbol;Acc:MGI:107158]
ENSMUST00000212095	ENSMUSG00000031622	8.72518	8.50515	1.02587	0.633983	0.823112	FALSE	Sin3b	transcriptional regulator, SIN3B (yeast) [Source:MGI Symbol;Acc:MGI:107158]
ENSMUST00000109950	ENSMUSG00000031622	25.0321	22.9881	1.08892	0.870734	0.942601	FALSE	Sin3b	transcriptional regulator, SIN3B (yeast) [Source:MGI Symbol;Acc:MGI:107158]
ENSMUST00000049169	ENSMUSG00000042557	0.0735497	2.58396	-35.1322	0.319575	0.629256	FALSE	Sin3a	transcriptional regulator, SIN3A (yeast) [Source:MGI Symbol;Acc:MGI:107157]
TCONS_00027619	ENSMUSG00000042557	9.25372	7.19753	1.28568	0.87309	0.943662	FALSE	Sin3a	transcriptional regulator, SIN3A (yeast) [Source:MGI Symbol;Acc:MGI:107157]
ENSMUST00000168678	ENSMUSG00000042557	4.09275	3.53473	1.15787	0.925884	0.967784	FALSE	Sin3a	transcriptional regulator, SIN3A (yeast) [Source:MGI Symbol;Acc:MGI:107157]
ENSMUST00000031097	ENSMUSG00000029196	12.1685	10.8402	1.12253	0.376646	0.679129	FALSE	Tada2b	transcriptional adaptor 2B [Source:MGI Symbol;Acc:MGI:3035274]
ENSMUST00000027846	ENSMUSG00000026563	15.2376	14.9129	1.02177	0.839776	0.927488	FALSE	Tada1	transcriptional adaptor 1 [Source:MGI Symbol;Acc:MGI:1196415]
ENSMUST00000076941	ENSMUSG00000033222	11.1398	14.3615	-1.28921	0.00283455	0.0648139	FALSE	Ttf2	transcription termination factor, RNA polymerase II [Source:MGI Symbol;Acc:MGI:1921294]
ENSMUST00000100237	ENSMUSG00000026803	3.67122	1.67173	2.19605	0.194904	0.533585	FALSE	Ttf1	transcription termination factor, RNA polymerase I [Source:MGI Symbol;Acc:MGI:105044]
ENSMUST00000086932	ENSMUSG00000023990	7.73029	6.04362	1.27908	0.325556	0.634089	FALSE	Tfeb	transcription factor EB [Source:MGI Symbol;Acc:MGI:103270]
ENSMUST00000077680	ENSMUSG00000000134	0.107702	1.41198	-13.11	0.00978215	0.111595	TRUE	Tfe3	transcription factor E3 [Source:MGI Symbol;Acc:MGI:98511]
ENSMUST00000101695	ENSMUSG00000000134	3.55579	0.001885	1886.36	0.432507	0.714595	FALSE	Tfe3	transcription factor E3 [Source:MGI Symbol;Acc:MGI:98511]
TCONS_00029210	ENSMUSG00000000134	0.310666	2.30346	-7.41459	0.578778	0.790537	FALSE	Tfe3	transcription factor E3 [Source:MGI Symbol;Acc:MGI:98511]
ENSMUST00000165768	ENSMUSG00000032411	2.5631	3.20373	-1.24994	0.875079	0.944528	FALSE	Tfdp2	transcription factor Dp 2 [Source:MGI Symbol;Acc:MGI:107167]
ENSMUST00000188750	ENSMUSG00000032411	1.38955	1.3168	1.05524	0.964427	0.98444	FALSE	Tfdp2	transcription factor Dp 2 [Source:MGI Symbol;Acc:MGI:107167]
ENSMUST00000170909	ENSMUSG00000038482	23.7076	36.4823	-1.53884	0.0133742	0.129955	TRUE	Tfdp1	transcription factor Dp 1 [Source:MGI Symbol;Acc:MGI:101934]
ENSMUST00000209885	ENSMUSG00000038482	0.952319	1.93379	-2.03061	0.45693	0.730117	FALSE	Tfdp1	transcription factor Dp 1 [Source:MGI Symbol;Acc:MGI:101934]
ENSMUST00000209396	ENSMUSG00000038482	2.63043	5.28294	-2.00839	0.679757	0.85075	FALSE	Tfdp1	transcription factor Dp 1 [Source:MGI Symbol;Acc:MGI:101934]
TCONS_00025788	ENSMUSG00000038482	6.27221	5.952	1.0538	0.747487	0.886542	FALSE	Tfdp1	transcription factor Dp 1 [Source:MGI Symbol;Acc:MGI:101934]
ENSMUST00000229696	ENSMUSG00000009733	5.23887	9.03588	-1.72478	0.36356	0.667806	FALSE	Tfcp2	transcription factor CP2 [Source:MGI Symbol;Acc:MGI:98509]
ENSMUST00000041003	ENSMUSG00000036983	5.44956	5.85579	-1.07454	0.0128752	0.127656	FALSE	Tfb1m	transcription factor B1, mitochondrial [Source:MGI Symbol;Acc:MGI:2146851]
ENSMUST00000005862	ENSMUSG00000005718	2.63843	4.40944	-1.67124	0.00487471	0.0824459	TRUE	Tfap4	transcription factor AP4 [Source:MGI Symbol;Acc:MGI:103239]
TCONS_00007483	ENSMUSG00000021359	5.62045	4.08833	1.37475	0.0903317	0.357538	FALSE	Tfap2a	transcription factor AP-2, alpha [Source:MGI Symbol;Acc:MGI:104671]
ENSMUST00000110193	ENSMUSG00000021359	15.3582	11.1824	1.37343	0.263938	0.596638	FALSE	Tfap2a	transcription factor AP-2, alpha [Source:MGI Symbol;Acc:MGI:104671]
TCONS_00007484	ENSMUSG00000021359	5.62944	7.40814	-1.31596	0.27695	0.601435	FALSE	Tfap2a	transcription factor AP-2, alpha [Source:MGI Symbol;Acc:MGI:104671]
ENSMUST00000021787	ENSMUSG00000021359	5.53022	4.65936	1.1869	0.487015	0.747692	FALSE	Tfap2a	transcription factor AP-2, alpha [Source:MGI Symbol;Acc:MGI:104671]
ENSMUST00000092430	ENSMUSG00000003923	13.1375	14.1901	-1.08012	0.20832	0.543587	FALSE	Tfam	transcription factor A, mitochondrial [Source:MGI Symbol;Acc:MGI:107810]
TCONS_00013700	ENSMUSG00000024985	0.03509	2.09981	-59.8408	0.193961	0.53283	FALSE	Tcf7l2	transcription factor 7 like 2, T cell specific, HMG box [Source:MGI Symbol;Acc:MGI:1202879]
TCONS_00013699	ENSMUSG00000024985	2.56911	1.2712	2.02101	0.470441	0.739629	FALSE	Tcf7l2	transcription factor 7 like 2, T cell specific, HMG box [Source:MGI Symbol;Acc:MGI:1202879]
ENSMUST00000105340	ENSMUSG00000020167	3.50819	5.25416	-1.49769	0.0666336	0.304963	FALSE	Tcf3	transcription factor 3 [Source:MGI Symbol;Acc:MGI:98510]
ENSMUST00000105342	ENSMUSG00000020167	2.88275	2.44843	1.17739	0.633626	0.823037	FALSE	Tcf3	transcription factor 3 [Source:MGI Symbol;Acc:MGI:98510]
ENSMUST00000211932	ENSMUSG00000001472	22.4531	16.4442	1.36541	0.00353187	0.0731039	FALSE	Tcf25	transcription factor 25 (basic helix-loop-helix) [Source:MGI Symbol;Acc:MGI:1914105]
ENSMUST00000212880	ENSMUSG00000001472	4.79192	2.62225	1.82741	0.122714	0.423946	FALSE	Tcf25	transcription factor 25 (basic helix-loop-helix) [Source:MGI Symbol;Acc:MGI:1914105]
ENSMUST00000108840	ENSMUSG00000001472	12.419	11.6407	1.06686	0.149206	0.468572	FALSE	Tcf25	transcription factor 25 (basic helix-loop-helix) [Source:MGI Symbol;Acc:MGI:1914105]
ENSMUST00000057934	ENSMUSG00000001472	5.31787	5.25732	1.01152	0.670989	0.845139	FALSE	Tcf25	transcription factor 25 (basic helix-loop-helix) [Source:MGI Symbol;Acc:MGI:1914105]
ENSMUST00000109510	ENSMUSG00000041852	0.749742	1.63279	-2.1778	0.34856	0.654016	FALSE	Tcf20	transcription factor 20 [Source:MGI Symbol;Acc:MGI:108399]
TCONS_00009807	ENSMUSG00000041852	5.75768	1.86815	3.08203	0.424529	0.714068	FALSE	Tcf20	transcription factor 20 [Source:MGI Symbol;Acc:MGI:108399]
TCONS_00009804	ENSMUSG00000041852	13.7805	10.7349	1.28371	0.618969	0.813916	FALSE	Tcf20	transcription factor 20 [Source:MGI Symbol;Acc:MGI:108399]
ENSMUST00000160885	ENSMUSG00000050410	10.9654	16.1904	-1.4765	0.0701916	0.313653	FALSE	Tcf19	transcription factor 19 [Source:MGI Symbol;Acc:MGI:103180]
ENSMUST00000159009	ENSMUSG00000050410	3.26742	7.78327	-2.38209	0.0829636	0.342243	FALSE	Tcf19	transcription factor 19 [Source:MGI Symbol;Acc:MGI:103180]
TCONS_00028636	ENSMUSG00000032228	64.4299	42.1385	1.529	0.0897137	0.356301	FALSE	Tcf12	transcription factor 12 [Source:MGI Symbol;Acc:MGI:101877]
ENSMUST00000183594	ENSMUSG00000032228	1.99155	3.47364	-1.74419	0.746418	0.886291	FALSE	Tcf12	transcription factor 12 [Source:MGI Symbol;Acc:MGI:101877]
ENSMUST00000183918	ENSMUSG00000032228	7.98393	5.65043	1.41298	0.964425	0.98444	FALSE	Tcf12	transcription factor 12 [Source:MGI Symbol;Acc:MGI:101877]
TCONS_00012677	ENSMUSG00000024498	8.504	10.3618	-1.21847	0.110187	0.398836	FALSE	Tcerg1	transcription elongation regulator 1 (CA150) [Source:MGI Symbol;Acc:MGI:1926421]
ENSMUST00000131601	ENSMUSG00000046909	1.89336	2.69131	-1.42145	0.69041	0.856692	FALSE	Tefm	transcription elongation factor, mitochondrial [Source:MGI Symbol;Acc:MGI:1915800]
ENSMUST00000050207	ENSMUSG00000046909	5.38787	5.04097	1.06882	0.997247	0.998213	FALSE	Tefm	transcription elongation factor, mitochondrial [Source:MGI Symbol;Acc:MGI:1915800]
ENSMUST00000048687	ENSMUSG00000042712	51.5092	61.0958	-1.18611	0.421077	0.713159	FALSE	Tceal9	transcription elongation factor A like 9 [Source:MGI Symbol;Acc:MGI:109567]
ENSMUST00000113115	ENSMUSG00000042712	4.28447	4.29747	-1.00303	0.86684	0.940443	FALSE	Tceal9	transcription elongation factor A like 9 [Source:MGI Symbol;Acc:MGI:109567]
ENSMUST00000060101	ENSMUSG00000051579	9.95164	10.096	-1.01451	0.186025	0.521083	FALSE	Tceal8	transcription elongation factor A (SII)-like 8 [Source:MGI Symbol;Acc:MGI:1913934]
ENSMUST00000117942	ENSMUSG00000067869	8.37268	9.57689	-1.14383	0.23326	0.57091	FALSE	Tcea1-ps1	transcription elongation factor A (SII) 1, pseudogene 1 [Source:MGI Symbol;Acc:MGI:1861432]
ENSMUST00000081551	ENSMUSG00000033813	32.0794	37.823	-1.17904	0.00191221	0.055893	FALSE	Tcea1	transcription elongation factor A (SII) 1 [Source:MGI Symbol;Acc:MGI:1196624]
TCONS_00000005	ENSMUSG00000033813	8.13533	8.03083	1.01301	0.65971	0.838568	FALSE	Tcea1	transcription elongation factor A (SII) 1 [Source:MGI Symbol;Acc:MGI:1196624]
TCONS_00007292	ENSMUSG00000033799	5.56164	3.6541	1.52203	0.307614	0.619293	FALSE	Fam208b	transcription activation suppressor family member 2 [Source:MGI Symbol;Acc:MGI:2145274]
TCONS_00007291	ENSMUSG00000033799	4.60944	6.12648	-1.32912	0.376996	0.679549	FALSE	Fam208b	transcription activation suppressor family member 2 [Source:MGI Symbol;Acc:MGI:2145274]
TCONS_00007968	ENSMUSG00000040651	5.87849	0.16921	34.7407	8.58e-05	0.0331924	TRUE	Fam208a	transcription activation suppressor [Source:MGI Symbol;Acc:MGI:1921694]
ENSMUST00000022450	ENSMUSG00000040651	0.29685	2.1211	-7.14537	0.00302456	0.0675949	TRUE	Fam208a	transcription activation suppressor [Source:MGI Symbol;Acc:MGI:1921694]
TCONS_00007967	ENSMUSG00000040651	0.367474	2.50468	-6.81592	0.00847558	0.106269	TRUE	Fam208a	transcription activation suppressor [Source:MGI Symbol;Acc:MGI:1921694]
ENSMUST00000109989	ENSMUSG00000020432	22.5099	5.13692	4.38199	0.120192	0.419141	FALSE	Tcn2	transcobalamin 2 [Source:MGI Symbol;Acc:MGI:98534]
ENSMUST00000109991	ENSMUSG00000020432	3.04811	0.700083	4.35392	0.134123	0.443198	FALSE	Tcn2	transcobalamin 2 [Source:MGI Symbol;Acc:MGI:98534]
ENSMUST00000109992	ENSMUSG00000020432	13.7347	11.1229	1.23481	0.203944	0.539824	FALSE	Tcn2	transcobalamin 2 [Source:MGI Symbol;Acc:MGI:98534]
ENSMUST00000020710	ENSMUSG00000020432	23.6182	12.0181	1.96522	0.368969	0.672175	FALSE	Tcn2	transcobalamin 2 [Source:MGI Symbol;Acc:MGI:98534]
ENSMUST00000109993	ENSMUSG00000020432	9.45636	17.0554	-1.80359	0.462944	0.734687	FALSE	Tcn2	transcobalamin 2 [Source:MGI Symbol;Acc:MGI:98534]
ENSMUST00000026576	ENSMUSG00000025503	54.8022	50.8751	1.07719	0.369205	0.672383	FALSE	Taldo1	transaldolase 1 [Source:MGI Symbol;Acc:MGI:1274789]
ENSMUST00000211654	ENSMUSG00000025503	2.17983	0.263616	8.26896	0.483505	0.747692	FALSE	Taldo1	transaldolase 1 [Source:MGI Symbol;Acc:MGI:1274789]
TCONS_00015890	ENSMUSG00000027109	3.56555	0.379326	9.3997	0.000751803	0.0440898	TRUE	Sp3	trans-acting transcription factor 3 [Source:MGI Symbol;Acc:MGI:1277166]
ENSMUST00000133615	ENSMUSG00000027109	10.0376	12.7428	-1.2695	0.0308359	0.197561	FALSE	Sp3	trans-acting transcription factor 3 [Source:MGI Symbol;Acc:MGI:1277166]
TCONS_00015889	ENSMUSG00000027109	0.0151537	1.47855	-97.5706	0.262946	0.595536	FALSE	Sp3	trans-acting transcription factor 3 [Source:MGI Symbol;Acc:MGI:1277166]
TCONS_00009429	ENSMUSG00000001280	1.10051	2.38744	-2.16941	0.571337	0.785274	FALSE	Sp1	trans-acting transcription factor 1 [Source:MGI Symbol;Acc:MGI:98372]
ENSMUST00000001326	ENSMUSG00000001280	15.9304	14.5754	1.09297	0.606788	0.806488	FALSE	Sp1	trans-acting transcription factor 1 [Source:MGI Symbol;Acc:MGI:98372]
ENSMUST00000165740	ENSMUSG00000031708	2.52119	3.68332	-1.46095	0.0380101	0.221889	FALSE	Tecr	trans-2,3-enoyl-CoA reductase [Source:MGI Symbol;Acc:MGI:1915408]
TCONS_00026920	ENSMUSG00000031708	21.0067	17.1974	1.2215	0.44934	0.724858	FALSE	Tecr	trans-2,3-enoyl-CoA reductase [Source:MGI Symbol;Acc:MGI:1915408]
ENSMUST00000049348	ENSMUSG00000032586	3.37091	5.9402	-1.7622	0.0032008	0.0697428	TRUE	Traip	TRAF-interacting protein [Source:MGI Symbol;Acc:MGI:1096377]
TCONS_00001173	ENSMUSG00000026028	40.0731	17.8686	2.24265	0.195748	0.534554	FALSE	Trak2	trafficking protein, kinesin binding 2 [Source:MGI Symbol;Acc:MGI:1918077]
ENSMUST00000027186	ENSMUSG00000026028	3.56524	9.05255	-2.53911	0.922371	0.966433	FALSE	Trak2	trafficking protein, kinesin binding 2 [Source:MGI Symbol;Acc:MGI:1918077]
ENSMUST00000211187	ENSMUSG00000032536	1.76474	2.90491	-1.64608	0.45339	0.727868	FALSE	Trak1	trafficking protein, kinesin binding 1 [Source:MGI Symbol;Acc:MGI:1914345]
TCONS_00028127	ENSMUSG00000032536	7.17749	6.15269	1.16656	0.502439	0.747692	FALSE	Trak1	trafficking protein, kinesin binding 1 [Source:MGI Symbol;Acc:MGI:1914345]
TCONS_00028129	ENSMUSG00000032536	2.07352	1.14556	1.81006	0.773761	0.8998	FALSE	Trak1	trafficking protein, kinesin binding 1 [Source:MGI Symbol;Acc:MGI:1914345]
ENSMUST00000230025	ENSMUSG00000047921	3.7994	2.27643	1.66902	0.186363	0.52159	FALSE	Trappc9	trafficking protein particle complex 9 [Source:MGI Symbol;Acc:MGI:1923760]
ENSMUST00000089770	ENSMUSG00000047921	7.27359	5.55435	1.30953	0.200142	0.537411	FALSE	Trappc9	trafficking protein particle complex 9 [Source:MGI Symbol;Acc:MGI:1923760]
ENSMUST00000097658	ENSMUSG00000033382	1.22461	3.25187	-2.65543	0.0280206	0.188919	TRUE	Trappc8	trafficking protein particle complex 8 [Source:MGI Symbol;Acc:MGI:2443008]
ENSMUST00000225661	ENSMUSG00000033382	9.28107	5.09533	1.82149	0.103138	0.38313	FALSE	Trappc8	trafficking protein particle complex 8 [Source:MGI Symbol;Acc:MGI:2443008]
TCONS_00012928	ENSMUSG00000033382	8.58067	8.41671	1.01948	0.945014	0.977095	FALSE	Trappc8	trafficking protein particle complex 8 [Source:MGI Symbol;Acc:MGI:2443008]
ENSMUST00000021380	ENSMUSG00000020993	8.28704	2.73875	3.02585	0.177413	0.509049	FALSE	Trappc6b	trafficking protein particle complex 6B [Source:MGI Symbol;Acc:MGI:1925482]
ENSMUST00000217660	ENSMUSG00000020993	2.19476	4.68857	-2.13626	0.192084	0.530065	FALSE	Trappc6b	trafficking protein particle complex 6B [Source:MGI Symbol;Acc:MGI:1925482]
ENSMUST00000218799	ENSMUSG00000020993	2.01691	2.27571	-1.12832	0.416276	0.709858	FALSE	Trappc6b	trafficking protein particle complex 6B [Source:MGI Symbol;Acc:MGI:1925482]
TCONS_00006437	ENSMUSG00000020993	2.72378	1.73322	1.57151	0.501006	0.747692	FALSE	Trappc6b	trafficking protein particle complex 6B [Source:MGI Symbol;Acc:MGI:1925482]
ENSMUST00000218686	ENSMUSG00000020993	8.50127	3.26602	2.60295	0.566395	0.783263	FALSE	Trappc6b	trafficking protein particle complex 6B [Source:MGI Symbol;Acc:MGI:1925482]
ENSMUST00000217873	ENSMUSG00000020993	5.11472	6.9948	-1.36758	0.650513	0.833469	FALSE	Trappc6b	trafficking protein particle complex 6B [Source:MGI Symbol;Acc:MGI:1925482]
ENSMUST00000219652	ENSMUSG00000020993	1.12017	0.855148	1.30991	0.993699	0.996694	FALSE	Trappc6b	trafficking protein particle complex 6B [Source:MGI Symbol;Acc:MGI:1925482]
ENSMUST00000136873	ENSMUSG00000002043	2.50361	3.81867	-1.52526	0.271099	0.601435	FALSE	Trappc6a	trafficking protein particle complex 6A [Source:MGI Symbol;Acc:MGI:1914341]
ENSMUST00000002112	ENSMUSG00000002043	23.445	21.249	1.10335	0.285602	0.604301	FALSE	Trappc6a	trafficking protein particle complex 6A [Source:MGI Symbol;Acc:MGI:1914341]
ENSMUST00000108455	ENSMUSG00000002043	1.69302	0.353369	4.79108	0.585616	0.794692	FALSE	Trappc6a	trafficking protein particle complex 6A [Source:MGI Symbol;Acc:MGI:1914341]
ENSMUST00000135972	ENSMUSG00000002043	4.35621	5.09035	-1.16853	0.968294	0.986062	FALSE	Trappc6a	trafficking protein particle complex 6A [Source:MGI Symbol;Acc:MGI:1914341]
ENSMUST00000213747	ENSMUSG00000032112	6.20327	2.73892	2.26486	0.102193	0.381568	FALSE	Trappc4	trafficking protein particle complex 4 [Source:MGI Symbol;Acc:MGI:1926211]
ENSMUST00000030660	ENSMUSG00000028847	30.9398	28.8909	1.07092	0.512273	0.748341	FALSE	Trappc3	trafficking protein particle complex 3 [Source:MGI Symbol;Acc:MGI:1351486]
ENSMUST00000015157	ENSMUSG00000015013	9.48906	9.49756	-1.0009	0.531455	0.760884	FALSE	Trappc2l	trafficking protein particle complex 2-like [Source:MGI Symbol;Acc:MGI:1916295]
TCONS_00007797	ENSMUSG00000021711	11.2594	10.7805	1.04442	0.880596	0.946713	FALSE	Trappc13	trafficking protein particle complex 13 [Source:MGI Symbol;Acc:MGI:1914225]
ENSMUST00000022224	ENSMUSG00000021711	10.4863	10.339	1.01425	0.917201	0.963947	FALSE	Trappc13	trafficking protein particle complex 13 [Source:MGI Symbol;Acc:MGI:1914225]
ENSMUST00000020954	ENSMUSG00000020628	10.2102	8.29723	1.23055	0.151553	0.472421	FALSE	Trappc12	trafficking protein particle complex 12 [Source:MGI Symbol;Acc:MGI:2445089]
ENSMUST00000039061	ENSMUSG00000038102	16.2925	17.3784	-1.06665	0.140595	0.45476	FALSE	Trappc11	trafficking protein particle complex 11 [Source:MGI Symbol;Acc:MGI:2444585]
ENSMUST00000000384	ENSMUSG00000000374	17.87	15.74	1.13532	0.0348421	0.21129	FALSE	Trappc10	trafficking protein particle complex 10 [Source:MGI Symbol;Acc:MGI:1336209]
ENSMUST00000102602	ENSMUSG00000049299	39.0438	30.0862	1.29773	0.394223	0.693325	FALSE	Trappc1	trafficking protein particle complex 1 [Source:MGI Symbol;Acc:MGI:1098727]
ENSMUST00000102601	ENSMUSG00000049299	3.82691	0.500722	7.64278	0.479731	0.745776	FALSE	Trappc1	trafficking protein particle complex 1 [Source:MGI Symbol;Acc:MGI:1098727]
TCONS_00021524	ENSMUSG00000042726	0.908456	1.98531	-2.18536	0.515455	0.750867	FALSE	Trafd1	TRAF type zinc finger domain containing 1 [Source:MGI Symbol;Acc:MGI:1923551]
TCONS_00021526	ENSMUSG00000042726	2.12077	1.05098	2.01791	0.693218	0.859017	FALSE	Trafd1	TRAF type zinc finger domain containing 1 [Source:MGI Symbol;Acc:MGI:1923551]
ENSMUST00000112494	ENSMUSG00000064289	4.83536	2.82698	1.71043	0.106936	0.391813	FALSE	Tank	TRAF family member-associated Nf-kappa B activator [Source:MGI Symbol;Acc:MGI:107676]
TCONS_00014616	ENSMUSG00000064289	1.03831	1.25259	-1.20637	0.529104	0.759906	FALSE	Tank	TRAF family member-associated Nf-kappa B activator [Source:MGI Symbol;Acc:MGI:107676]
ENSMUST00000112495	ENSMUSG00000064289	2.16846	1.19784	1.8103	0.729093	0.878415	FALSE	Tank	TRAF family member-associated Nf-kappa B activator [Source:MGI Symbol;Acc:MGI:107676]
TCONS_00014617	ENSMUSG00000064289	5.41494	3.34101	1.62075	0.883632	0.947863	FALSE	Tank	TRAF family member-associated Nf-kappa B activator [Source:MGI Symbol;Acc:MGI:107676]
ENSMUST00000169870	ENSMUSG00000015363	9.88057	10.8297	-1.09606	0.735324	0.881539	FALSE	Trabd	TraB domain containing [Source:MGI Symbol;Acc:MGI:1915226]
ENSMUST00000169891	ENSMUSG00000015363	2.26155	2.75994	-1.22038	0.743199	0.88504	FALSE	Trabd	TraB domain containing [Source:MGI Symbol;Acc:MGI:1915226]
ENSMUST00000165690	ENSMUSG00000015363	3.02909	3.81899	-1.26077	0.953602	0.980685	FALSE	Trabd	TraB domain containing [Source:MGI Symbol;Acc:MGI:1915226]
ENSMUST00000109816	ENSMUSG00000027469	1.04775	6.496	-6.19998	0.150637	0.471378	FALSE	Tpx2	TPX2, microtubule-associated [Source:MGI Symbol;Acc:MGI:1919369]
ENSMUST00000028969	ENSMUSG00000027469	8.62884	16.8357	-1.95109	0.178613	0.510731	FALSE	Tpx2	TPX2, microtubule-associated [Source:MGI Symbol;Acc:MGI:1919369]
ENSMUST00000178997	ENSMUSG00000027469	0.230559	1.64125	-7.11857	0.216289	0.551229	FALSE	Tpx2	TPX2, microtubule-associated [Source:MGI Symbol;Acc:MGI:1919369]
TCONS_00015150	ENSMUSG00000027469	6.54461	6.39577	1.02327	0.768674	0.897298	FALSE	Tpx2	TPX2, microtubule-associated [Source:MGI Symbol;Acc:MGI:1919369]
TCONS_00015151	ENSMUSG00000027469	3.04489	2.76062	1.10297	0.827989	0.923783	FALSE	Tpx2	TPX2, microtubule-associated [Source:MGI Symbol;Acc:MGI:1919369]
ENSMUST00000067137	ENSMUSG00000054226	18.6209	11.5853	1.60729	0.000433258	0.0416324	TRUE	Tprkb	Tp53rk binding protein [Source:MGI Symbol;Acc:MGI:1917036]
ENSMUST00000113753	ENSMUSG00000054226	0.451841	2.39396	-5.29823	0.453856	0.727868	FALSE	Tprkb	Tp53rk binding protein [Source:MGI Symbol;Acc:MGI:1917036]
ENSMUST00000031508	ENSMUSG00000029535	8.67292	10.3178	-1.18966	0.0668847	0.305395	FALSE	Triap1	TP53 regulated inhibitor of apoptosis 1 [Source:MGI Symbol;Acc:MGI:1916326]
TCONS_00008104	ENSMUSG00000016831	1.76896	5.28456	-2.98738	0.301608	0.613076	FALSE	Tox4	TOX high mobility group box family member 4 [Source:MGI Symbol;Acc:MGI:1915389]
ENSMUST00000022766	ENSMUSG00000016831	9.78303	6.13597	1.59437	0.561645	0.77989	FALSE	Tox4	TOX high mobility group box family member 4 [Source:MGI Symbol;Acc:MGI:1915389]
TCONS_00008103	ENSMUSG00000016831	1.58675	1.08175	1.46684	0.749153	0.887503	FALSE	Tox4	TOX high mobility group box family member 4 [Source:MGI Symbol;Acc:MGI:1915389]
TCONS_00004282	ENSMUSG00000020694	5.43357	2.07347	2.62052	0.657704	0.837493	FALSE	Tlk2	tousled-like kinase 2 (Arabidopsis) [Source:MGI Symbol;Acc:MGI:1346023]
ENSMUST00000106941	ENSMUSG00000020694	5.25131	5.89972	-1.12348	0.780083	0.903377	FALSE	Tlk2	tousled-like kinase 2 (Arabidopsis) [Source:MGI Symbol;Acc:MGI:1346023]
ENSMUST00000092537	ENSMUSG00000020694	5.28337	5.23133	1.00995	0.865971	0.94022	FALSE	Tlk2	tousled-like kinase 2 (Arabidopsis) [Source:MGI Symbol;Acc:MGI:1346023]
ENSMUST00000038584	ENSMUSG00000041997	9.17513	6.58436	1.39347	0.111673	0.401926	FALSE	Tlk1	tousled-like kinase 1 [Source:MGI Symbol;Acc:MGI:2441683]
TCONS_00015872	ENSMUSG00000041997	11.7646	11.7113	1.00455	0.294533	0.607041	FALSE	Tlk1	tousled-like kinase 1 [Source:MGI Symbol;Acc:MGI:2441683]
ENSMUST00000079625	ENSMUSG00000060519	5.68293	4.72766	1.20206	0.83512	0.926753	FALSE	Tor3a	torsin family 3, member A [Source:MGI Symbol;Acc:MGI:1353652]
ENSMUST00000009707	ENSMUSG00000009563	4.65595	6.34219	-1.36217	0.270227	0.601435	FALSE	Tor2a	torsin family 2, member A [Source:MGI Symbol;Acc:MGI:1353596]
TCONS_00014445	ENSMUSG00000026848	4.17767	4.27315	-1.02285	0.892579	0.952895	FALSE	Tor1b	torsin family 1, member B [Source:MGI Symbol;Acc:MGI:1353605]
ENSMUST00000137694	ENSMUSG00000026849	1.77705	4.01103	-2.25713	0.298485	0.610782	FALSE	Tor1a	torsin family 1, member A (torsin A) [Source:MGI Symbol;Acc:MGI:1353568]
TCONS_00000687	ENSMUSG00000050565	2.34801	3.19171	-1.35933	0.414306	0.708782	FALSE	Tor1aip2	torsin A interacting protein 2 [Source:MGI Symbol;Acc:MGI:3582695]
ENSMUST00000060404	ENSMUSG00000050565	4.05755	1.56189	2.59784	0.595752	0.801256	FALSE	Tor1aip2	torsin A interacting protein 2 [Source:MGI Symbol;Acc:MGI:3582695]
ENSMUST00000111754	ENSMUSG00000050565	3.22675	6.4214	-1.99005	0.69921	0.862179	FALSE	Tor1aip2	torsin A interacting protein 2 [Source:MGI Symbol;Acc:MGI:3582695]
TCONS_00000691	ENSMUSG00000050565	8.48642	7.72309	1.09884	0.982692	0.992232	FALSE	Tor1aip2	torsin A interacting protein 2 [Source:MGI Symbol;Acc:MGI:3582695]
ENSMUST00000097527	ENSMUSG00000026466	15.089	6.68046	2.25868	0.240014	0.576941	FALSE	Tor1aip1	torsin A interacting protein 1 [Source:MGI Symbol;Acc:MGI:3582693]
ENSMUST00000169241	ENSMUSG00000026466	0.00509033	1.52334	-299.262	0.435675	0.715606	FALSE	Tor1aip1	torsin A interacting protein 1 [Source:MGI Symbol;Acc:MGI:3582693]
ENSMUST00000130995	ENSMUSG00000026466	0.180454	1.80123	-9.98163	0.952652	0.980394	FALSE	Tor1aip1	torsin A interacting protein 1 [Source:MGI Symbol;Acc:MGI:3582693]
ENSMUST00000042575	ENSMUSG00000036822	18.2962	20.0005	-1.09315	0.0390218	0.225644	FALSE	Topors	topoisomerase I binding, arginine/serine-rich [Source:MGI Symbol;Acc:MGI:2146189]
ENSMUST00000035164	ENSMUSG00000032555	30.0817	32.1042	-1.06723	0.192117	0.530067	FALSE	Topbp1	topoisomerase (DNA) II binding protein 1 [Source:MGI Symbol;Acc:MGI:1920018]
ENSMUST00000185721	ENSMUSG00000032555	1.85129	4.31959	-2.33329	0.357205	0.661769	FALSE	Topbp1	topoisomerase (DNA) II binding protein 1 [Source:MGI Symbol;Acc:MGI:1920018]
TCONS_00007889	ENSMUSG00000017485	9.62877	0.280512	34.3256	0.00951179	0.110701	TRUE	Top2b	topoisomerase (DNA) II beta [Source:MGI Symbol;Acc:MGI:98791]
ENSMUST00000017629	ENSMUSG00000017485	4.30823	14.7073	-3.41376	0.0100385	0.112859	TRUE	Top2b	topoisomerase (DNA) II beta [Source:MGI Symbol;Acc:MGI:98791]
TCONS_00007891	ENSMUSG00000017485	1.23873	0.0599377	20.667	0.494271	0.747692	FALSE	Top2b	topoisomerase (DNA) II beta [Source:MGI Symbol;Acc:MGI:98791]
ENSMUST00000154332	ENSMUSG00000020914	5.37536	9.25951	-1.72258	0.00053938	0.0416324	TRUE	Top2a	topoisomerase (DNA) II alpha [Source:MGI Symbol;Acc:MGI:98790]
ENSMUST00000068031	ENSMUSG00000020914	65.2171	109.606	-1.68063	0.000572334	0.0416324	TRUE	Top2a	topoisomerase (DNA) II alpha [Source:MGI Symbol;Acc:MGI:98790]
ENSMUST00000139460	ENSMUSG00000020914	28.4003	53.9958	-1.90124	0.00159416	0.0534264	TRUE	Top2a	topoisomerase (DNA) II alpha [Source:MGI Symbol;Acc:MGI:98790]
ENSMUST00000109468	ENSMUSG00000070544	32.1426	31.8232	1.01004	0.431089	0.714068	FALSE	Top1	topoisomerase (DNA) I [Source:MGI Symbol;Acc:MGI:98788]
ENSMUST00000206017	ENSMUSG00000046591	0.391554	2.26816	-5.7927	0.193393	0.532258	FALSE	Ticrr	TOPBP1-interacting checkpoint and replication regulator [Source:MGI Symbol;Acc:MGI:1924261]
ENSMUST00000035977	ENSMUSG00000046591	3.42554	2.01134	1.70311	0.307903	0.619402	FALSE	Ticrr	TOPBP1-interacting checkpoint and replication regulator [Source:MGI Symbol;Acc:MGI:1924261]
ENSMUST00000058136	ENSMUSG00000047123	12.3095	8.40256	1.46497	0.0243468	0.175522	FALSE	Ticam1	toll-like receptor adaptor molecule 1 [Source:MGI Symbol;Acc:MGI:2147032]
ENSMUST00000048096	ENSMUSG00000039005	14.8292	16.982	-1.14517	0.61906	0.813916	FALSE	Tlr4	toll-like receptor 4 [Source:MGI Symbol;Acc:MGI:96824]
TCONS_00018435	ENSMUSG00000039005	1.87862	1.51195	1.24252	0.737219	0.882709	FALSE	Tlr4	toll-like receptor 4 [Source:MGI Symbol;Acc:MGI:96824]
TCONS_00026729	ENSMUSG00000031639	1.62767	0.640608	2.54082	0.607981	0.80712	FALSE	Tlr3	toll-like receptor 3 [Source:MGI Symbol;Acc:MGI:2156367]
ENSMUST00000176685	ENSMUSG00000032041	1.79901	0.741175	2.42724	0.537524	0.764365	FALSE	Tirap	toll-interleukin 1 receptor (TIR) domain-containing adaptor protein [Source:MGI Symbol;Acc:MGI:2152213]
ENSMUST00000001950	ENSMUSG00000025139	28.6541	21.4765	1.33421	0.00452327	0.0788793	FALSE	Tollip	toll interacting protein [Source:MGI Symbol;Acc:MGI:1891808]
ENSMUST00000066296	ENSMUSG00000035614	4.20273	3.54031	1.18711	0.522842	0.755556	FALSE	Togaram1	TOG array regulator of axonemal microtubules 1 [Source:MGI Symbol;Acc:MGI:2684313]
ENSMUST00000223166	ENSMUSG00000035614	6.62482	5.43981	1.21784	0.701931	0.863595	FALSE	Togaram1	TOG array regulator of axonemal microtubules 1 [Source:MGI Symbol;Acc:MGI:2684313]
TCONS_00015282	ENSMUSG00000017679	4.33861	3.71975	1.16637	0.631427	0.82186	FALSE	Ttpal	tocopherol (alpha) transfer protein-like [Source:MGI Symbol;Acc:MGI:1923330]
[truncated: 13,907 more rows]
